# Supplementary material for: Leptospiral Leucine-Rich Repeat Protein-Based Lateral Flow for Assessment of Canine Leptospiral Immunoglobulin G
Source: MDPI journal article supplement (doi:10.3390/tropicalmed7120427), 2022-12-10
Supplement: s1 [file s1]

## Supplementary data

### Evaluation of a Leucine-rich-repeat protein-based lateral flow assay for detection of anti-leptospiral IgG in Thai canine

Sineenat Sripattanakul <sup>1,2,†</sup>, Kanpapat Boonchuay <sup>3,4,†</sup>, Teerasak Prapong <sup>2</sup>, Worawidh Wajjwalku <sup>3,4</sup>, Gerd Katzenmeier <sup>3,4</sup>, Dietmar Haltrich <sup>5</sup>, Ratchanee Hongprayoon <sup>1</sup> and Siriwan Prapong <sup>1,2,\*</sup>

**Supplementary Table S1:** The reference serovars and strains of *Leptospira* spp. utilized in real-time PCR and MAT.

| Genospecies              | Serovars <sup>a</sup> | Strain <sup>a</sup> |
|--------------------------|-----------------------|---------------------|
| <i>L. interrogans</i>    | Autumnalis            | Akiyami             |
|                          | Bataviae              | A Swart             |
|                          | Bratislava            | Jez Bratislava      |
|                          | Canicola              | Houd UtrechtIV      |
|                          | Djasiman              | Djasiman            |
|                          | Hebdomadis            | Hebdomadis          |
|                          | Icterohaemorrhagiae   | RGA                 |
|                          | Pomona                | Pomona              |
|                          | Pyrogenes             | Salinem             |
| <i>L. noguchii</i>       | Louisiana             | LSU 1945            |
|                          | Panama                | CZ 214 K            |
| <i>L. borgpetersenii</i> | Ballum                | MUS 127             |
|                          | Javanica              | Veldrat Batavia 46  |
|                          | Mini                  | Sari                |
|                          | Sejroe                | M 84                |
|                          | Tarassovi             | Perepelitsin        |
| <i>L. santarosai</i>     | Shermani              | 1342 K              |
| <i>L. weilii</i>         | Celledoni             | Celledoni           |
|                          | Manhao                | L 105               |
|                          | Sarmin                | Sarmin              |
| <i>L. kirschneri</i>     | Cynopteri             | 3522 C              |
|                          | Grippotyphosa         | Moskva V            |
| <i>L. meyeri</i>         | Ranarum               | ICF                 |
| <i>L. biflexa</i>        | Patoc                 | Patoc 1             |

<sup>a</sup> The serovars and strains of *Leptospira* were kindly provided by the National Institute of Animal Health, department of Livestock Department, Thailand.

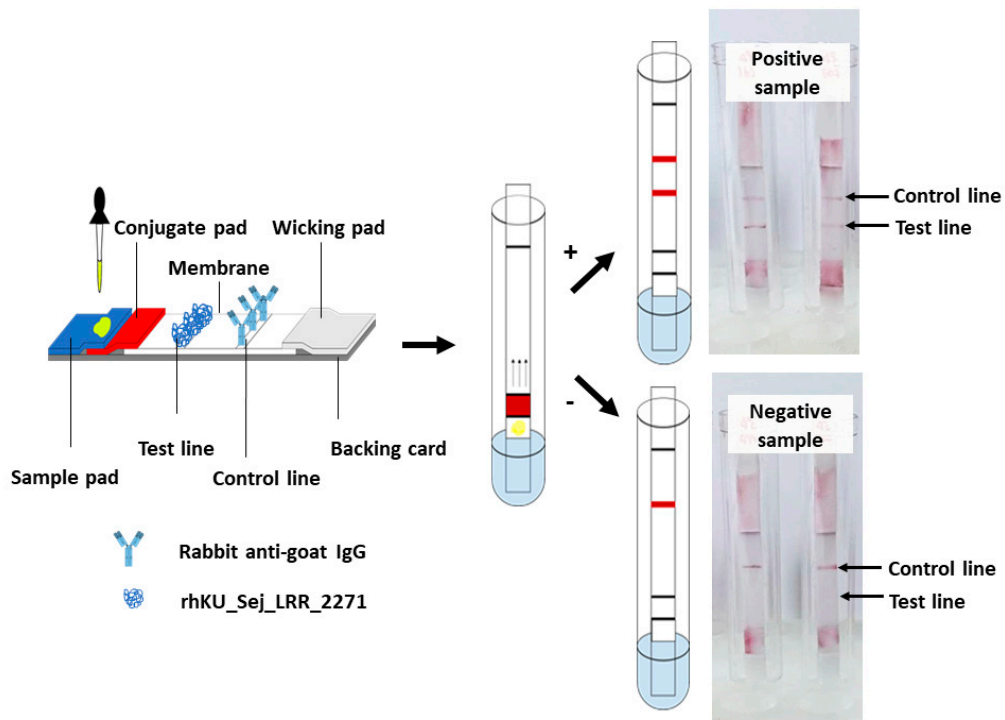

**Supplementary Figure S1:** Schematic representation of the different parts of the rhKU\_Sej\_LRR\_2271 lateral flow strip and representation of the results after testing with positive and negative dog plasma samples. The test line contained 800  $\mu\text{g/ml}$  of rhKU\_Sej\_LRR\_2271 and the control line 100  $\mu\text{g/ml}$  of rabbit anti-goat IgG. The conjugate pad contained of gold nanoparticle conjugated goat anti-dog IgG. The running buffer was 0.2 M SBB with 1 % Tween20 and 0.02 %  $\text{NaN}_3$ .

**Supplementary data S1:** Amino sequence alignment of rhKU\_Sej\_LRR\_2271

BLASTP 2.13.0+

Reference: Stephen F. Altschul, Thomas L. Madden, Alejandro A. Schaffer, Jinghui Zhang, Zheng Zhang, Webb Miller, and David J. Lipman (1997), "Gapped BLAST and PSI-BLAST: a new generation of protein database search programs", Nucleic Acids Res. 25:3389-3402.

Reference for compositional score matrix adjustment: Stephen F. Altschul, John C. Wootton, E. Michael Gertz, Richa Agarwala, Aleksandr Morgulis, Alejandro A. Schaffer, and Yi-Kuo Yu (2005) "Protein database searches using compositionally adjusted substitution matrices", FEBS J. 272:5101-5109.

RID: PN3VPV8W013

Database: All non-redundant GenBank CDS translations+PDB+SwissProt+PIR+PRF excluding environmental samples from WGS projects

512,909,985 sequences; 200,317,139,153 total letters

Query= AFV46188.1 leucine-rich repeat protein, partial [*Leptospira borgpetersenii* serovar Sejroe]

Length=203

| Description                                                                           | Max Score | Total Score | Query Cover | E value   | Per. Ident | Accession      |
|---------------------------------------------------------------------------------------|-----------|-------------|-------------|-----------|------------|----------------|
| leucine-rich repeat protein [Leptospira borgpetersenii serovar Ballum]                | 358       | 358         | 100%        | 6.00E-124 | 100.00%    | AFV46186.1     |
| leucine rich repeat protein [Leptospira borgpetersenii serovar Ballum]                | 359       | 359         | 100%        | 8.00E-124 | 100.00%    | ALO26640.1     |
| leucine-rich repeat domain-containing protein [Leptospira]                            | 358       | 358         | 100%        | 1.00E-123 | 100.00%    | WP_002731979.1 |
| leucine-rich repeat protein [Leptospira borgpetersenii serovar Javanica]              | 354       | 354         | 100%        | 3.00E-122 | 99.01%     | AFV46185.1     |
| leucine rich repeat protein [Leptospira borgpetersenii serovar Pomona str. 200901868] | 354       | 354         | 100%        | 7.00E-122 | 99.01%     | EMO62774.1     |
| leucine-rich repeat domain-containing protein [Leptospira borgpetersenii]             | 352       | 352         | 100%        | 4.00E-121 | 98.52%     | WP_011669694.1 |
| hypothetical protein [Leptospira mayottensis]                                         | 331       | 331         | 100%        | 8.00E-113 | 91.63%     | WP_002745429.1 |
| hypothetical protein [Leptospira weilii]                                              | 330       | 330         | 100%        | 1.00E-112 | 90.15%     | WP_235596156.1 |
| leucine rich repeat protein [Leptospira sp. P2653]                                    | 328       | 328         | 100%        | 1.00E-111 | 91.13%     | EMJ66028.1     |
| leucine-rich repeat domain-containing protein [Leptospira]                            | 328       | 328         | 100%        | 1.00E-111 | 91.13%     | WP_004496751.1 |
| leucine-rich repeat domain-containing protein [Leptospira weilii]                     | 326       | 326         | 100%        | 8.00E-111 | 90.64%     | WP_061219130.1 |
| leucine rich repeat protein [Leptospira weilii str. UI 13098]                         | 325       | 325         | 100%        | 1.00E-110 | 90.64%     | EMN91031.1     |
| leucine-rich repeat domain-containing protein [Leptospira weilii]                     | 325       | 325         | 100%        | 2.00E-110 | 90.64%     | WP_026054684.1 |
| leucine-rich repeat domain-containing protein [Leptospira weilii]                     | 322       | 322         | 99%         | 2.00E-109 | 90.59%     | WP_061217745.1 |
| leucine rich repeat protein [Leptospira alexanderi serovar Manhao 3 str. L 60]        | 312       | 312         | 100%        | 2.00E-105 | 86.70%     | EQA64549.1     |
| hypothetical protein [Leptospira alexanderi]                                          | 311       | 311         | 100%        | 3.00E-105 | 86.70%     | WP_039940928.1 |
| hypothetical protein [Leptospira alexanderi]                                          | 309       | 309         | 100%        | 4.00E-104 | 86.21%     | WP_078124592.1 |
| leucine-rich repeat domain-containing protein [Leptospira santarosai]                 | 307       | 307         | 100%        | 2.00E-103 | 86.34%     | WP_004466481.1 |
| leucine-rich repeat domain-containing protein [Leptospira santarosai]                 | 306       | 306         | 100%        | 4.00E-103 | 85.85%     | WP_046692451.1 |

| Description                                                                         | Max Score | Total Score | Query Cover | E value   | Per. Ident | Accession      |
|-------------------------------------------------------------------------------------|-----------|-------------|-------------|-----------|------------|----------------|
| hypothetical protein LSS_15741 [Leptospira santarosai serovar Shermani str. LT 821] | 305       | 305         | 100%        | 1.00E-102 | 85.85%     | EKT85788.2     |
| leucine-rich repeat domain-containing protein [Leptospira]                          | 305       | 305         | 100%        | 2.00E-102 | 85.85%     | WP_004471631.1 |
| leucine-rich repeat domain-containing protein [Leptospira santarosai]               | 305       | 305         | 100%        | 2.00E-102 | 85.85%     | WP_061216203.1 |
| leucine-rich repeat domain-containing protein [Leptospira santarosai]               | 304       | 304         | 100%        | 3.00E-102 | 85.85%     | WP_004492778.1 |
| leucine rich repeat protein [Leptospira santarosai str. CBC1416]                    | 305       | 305         | 100%        | 3.00E-102 | 85.37%     | EMO58507.1     |
| leucine-rich repeat domain-containing protein [Leptospira santarosai]               | 304       | 304         | 100%        | 4.00E-102 | 85.37%     | WP_004468285.1 |
| leucine-rich repeat domain-containing protein [Leptospira santarosai]               | 303       | 303         | 100%        | 6.00E-102 | 84.88%     | WP_004486481.1 |
| leucine-rich repeat domain-containing protein [Leptospira santarosai]               | 303       | 303         | 100%        | 8.00E-102 | 85.37%     | WP_004473752.1 |
| leucine-rich repeat domain-containing protein [Leptospira santarosai]               | 302       | 302         | 100%        | 2.00E-101 | 84.88%     | WP_004476114.1 |
| leucine rich repeat protein [Leptospira weilii serovar Topaz str. LT2116]           | 294       | 294         | 91%         | 1.00E-98  | 90.27%     | EMF79993.1     |
| leucine rich repeat protein [Leptospira weilii str. Ecochallenge]                   | 290       | 290         | 91%         | 4.00E-97  | 90.27%     | EMY13797.1     |
| leucine-rich repeat domain-containing protein [Leptospira barantonii]               | 289       | 289         | 96%         | 4.00E-96  | 84.62%     | WP_100761136.1 |
| leucine-rich repeat domain-containing protein [Leptospira kmetyi]                   | 280       | 280         | 96%         | 1.00E-92  | 82.05%     | WP_123179347.1 |
| leucine-rich repeat domain-containing protein [Leptospira kmetyi]                   | 280       | 280         | 96%         | 1.00E-92  | 82.56%     | WP_100755326.1 |
| leucine-rich repeat domain-containing protein [Leptospira kmetyi]                   | 279       | 279         | 96%         | 3.00E-92  | 82.05%     | WP_135607718.1 |
| leucine-rich repeat domain-containing protein [Leptospira alstonii]                 | 278       | 278         | 96%         | 6.00E-92  | 83.59%     | WP_020775386.1 |
| leucine-rich repeat domain-containing protein [Leptospira kmetyi]                   | 278       | 278         | 96%         | 6.00E-92  | 82.05%     | WP_010574016.1 |

| Description                                                               | Max Score | Total Score | Query Cover | E value  | Per. Ident | Accession      |
|---------------------------------------------------------------------------|-----------|-------------|-------------|----------|------------|----------------|
| leucine-rich repeat domain-containing protein [Leptospira kmetyi]         | 278       | 278         | 96%         | 7.00E-92 | 81.54%     | WP_135653950.1 |
| leucine-rich repeat domain-containing protein [Leptospira kmetyi]         | 278       | 278         | 96%         | 7.00E-92 | 81.54%     | WP_100738364.1 |
| hypothetical protein [Leptospira yasudae]                                 | 277       | 277         | 95%         | 1.00E-91 | 81.87%     | MBW0432169.1   |
| hypothetical protein EHR10_00815 [Leptospira yasudae]                     | 277       | 277         | 95%         | 2.00E-91 | 81.87%     | TGN02502.1     |
| hypothetical protein [Leptospira yasudae]                                 | 276       | 276         | 95%         | 2.00E-91 | 82.38%     | WP_118964127.1 |
| leucine-rich repeat domain-containing protein [Leptospira alstonii]       | 276       | 276         | 96%         | 3.00E-91 | 83.08%     | WP_061249228.1 |
| leucine rich repeat protein [Leptospira weilii serovar Ranarum str. ICFT] | 277       | 277         | 100%        | 4.00E-91 | 78.05%     | EMY77189.1     |
| hypothetical protein [Leptospira sanjuanensis]                            | 276       | 276         | 95%         | 4.00E-91 | 81.87%     | WP_238730679.1 |
| hypothetical protein [Leptospira sanjuanensis]                            | 276       | 276         | 95%         | 6.00E-91 | 81.87%     | WP_238747060.1 |
| hypothetical protein [Leptospira yasudae]                                 | 275       | 275         | 99%         | 9.00E-91 | 79.70%     | WP_135574399.1 |
| hypothetical protein [Leptospira yasudae]                                 | 273       | 273         | 95%         | 7.00E-90 | 81.35%     | WP_135581985.1 |
| hypothetical protein [Leptospira yasudae]                                 | 271       | 271         | 95%         | 2.00E-89 | 80.83%     | WP_118956310.1 |
| hypothetical protein [Leptospira kirschneri]                              | 270       | 270         | 95%         | 2.00E-88 | 81.44%     | WP_004767299.1 |
| hypothetical protein [Leptospira kirschneri]                              | 270       | 270         | 95%         | 2.00E-88 | 81.44%     | WP_004759233.1 |
| hypothetical protein [Leptospira]                                         | 269       | 269         | 95%         | 3.00E-88 | 80.93%     | WP_004750770.1 |
| hypothetical protein [Leptospira kirschneri]                              | 269       | 269         | 95%         | 3.00E-88 | 80.93%     | WP_004779378.1 |
| hypothetical protein [Leptospira kirschneri]                              | 268       | 268         | 95%         | 4.00E-88 | 80.93%     | WP_016752856.1 |
| hypothetical protein [Leptospira kirschneri]                              | 268       | 268         | 95%         | 7.00E-88 | 80.93%     | WP_020778543.1 |
| hypothetical protein [Leptospira kirschneri]                              | 268       | 268         | 95%         | 1.00E-87 | 80.41%     | WP_082292870.1 |
| hypothetical protein [Leptospira kirschneri]                              | 267       | 267         | 95%         | 2.00E-87 | 80.41%     | WP_004768364.1 |
| hypothetical protein [Leptospira kirschneri]                              | 266       | 266         | 95%         | 2.00E-87 | 80.93%     | WP_004760926.1 |
| hypothetical protein [Leptospira tipperaryensis]                          | 261       | 261         | 95%         | 4.00E-85 | 78.24%     | WP_069608131.1 |
| hypothetical protein [Leptospira ainlahdjerensis]                         | 261       | 261         | 95%         | 4.00E-85 | 77.72%     | WP_205279762.1 |
| hypothetical protein [Leptospira ainazelensis]                            | 258       | 258         | 95%         | 5.00E-84 | 77.20%     | WP_232371773.1 |
| hypothetical protein [Leptospira ainazelensis]                            | 258       | 258         | 95%         | 6.00E-84 | 77.20%     | MBM9502464.1   |
| hypothetical protein [Leptospira noguchii]                                | 255       | 255         | 99%         | 7.00E-83 | 78.22%     | WP_004443975.1 |

| Description                                                           | Max Score | Total Score | Query<br>Cover | E value  | Per. Ident | Accession      |
|-----------------------------------------------------------------------|-----------|-------------|----------------|----------|------------|----------------|
| hypothetical protein [Leptospira noguchii]                            | 254       | 254         | 95%            | 1.00E-82 | 80.93%     | WP_004449517.1 |
| hypothetical protein [Leptospira noguchii]                            | 254       | 254         | 95%            | 2.00E-82 | 80.93%     | WP_004422093.1 |
| hypothetical protein [Leptospira noguchii]                            | 254       | 254         | 95%            | 2.00E-82 | 80.93%     | WP_004455400.1 |
| hypothetical protein [Leptospira noguchii]                            | 254       | 254         | 95%            | 3.00E-82 | 80.41%     | WP_243817925.1 |
| hypothetical protein [Leptospira noguchii]                            | 254       | 254         | 95%            | 3.00E-82 | 80.41%     | WP_053522720.1 |
| hypothetical protein [Leptospira noguchii]                            | 253       | 253         | 99%            | 4.00E-82 | 77.72%     | WP_004452014.1 |
| hypothetical protein [Leptospira noguchii]                            | 253       | 253         | 99%            | 5.00E-82 | 77.72%     | WP_243827912.1 |
| hypothetical protein [Leptospira noguchii]                            | 253       | 253         | 99%            | 8.00E-82 | 77.72%     | WP_061233070.1 |
| hypothetical protein [Leptospira interrogans]                         | 252       | 252         | 95%            | 1.00E-81 | 80.93%     | WP_017852233.1 |
| hypothetical protein [Leptospira interrogans]                         | 251       | 251         | 95%            | 3.00E-81 | 80.93%     | WP_061241709.1 |
| hypothetical protein [Leptospira interrogans]                         | 251       | 251         | 95%            | 3.00E-81 | 80.93%     | WP_001010180.1 |
| hypothetical protein [Leptospira]                                     | 251       | 251         | 95%            | 3.00E-81 | 80.93%     | WP_001011126.1 |
| hypothetical protein [Leptospira stimsonii]                           | 251       | 251         | 96%            | 4.00E-81 | 74.36%     | WP_118981207.1 |
| hypothetical protein [Leptospira noguchii]                            | 251       | 251         | 95%            | 4.00E-81 | 79.38%     | WP_004427427.1 |
| hypothetical protein [Leptospira noguchii]                            | 251       | 251         | 99%            | 5.00E-81 | 77.23%     | WP_004438578.1 |
| leucine rich repeat protein [Leptospira interrogans str. L1207]       | 250       | 250         | 95%            | 6.00E-81 | 80.41%     | EMN50877.1     |
| hypothetical protein [Leptospira]                                     | 250       | 250         | 95%            | 7.00E-81 | 80.41%     | WP_001010181.1 |
| hypothetical protein [Leptospira interrogans]                         | 250       | 250         | 95%            | 8.00E-81 | 80.41%     | WP_001010177.1 |
| hypothetical protein [Leptospira noguchii]                            | 250       | 250         | 95%            | 1.00E-80 | 79.90%     | WP_002177142.1 |
| hypothetical protein [Leptospira adleri]                              | 249       | 249         | 95%            | 1.00E-80 | 74.61%     | WP_100785841.1 |
| hypothetical protein [Leptospira adleri]                              | 249       | 249         | 95%            | 2.00E-80 | 74.61%     | WP_135691680.1 |
| hypothetical protein CH379_21015 [Leptospira ellisii]                 | 248       | 248         | 98%            | 4.00E-80 | 71.50%     | PJZ91020.1     |
| hypothetical protein [Leptospira interrogans]                         | 248       | 248         | 95%            | 5.00E-80 | 79.90%     | WP_002188945.1 |
| hypothetical protein [Leptospira stimsonii]                           | 248       | 248         | 95%            | 6.00E-80 | 75.13%     | WP_118970865.1 |
| hypothetical protein [Leptospira ellisii]                             | 246       | 246         | 95%            | 2.00E-79 | 73.20%     | WP_243399589.1 |
| leucine-rich repeat domain-containing protein [Leptospira gomenensis] | 244       | 244         | 95%            | 2.00E-78 | 70.47%     | WP_135589926.1 |
| hypothetical protein [Leptospira interrogans]                         | 232       | 232         | 95%            | 1.00E-73 | 80.41%     | WP_250180949.1 |
| hypothetical protein [Leptospira interrogans]                         | 231       | 231         | 95%            | 2.00E-73 | 80.41%     | WP_061272825.1 |

| <b>Description</b>                                                                 | <b>Max Score</b> | <b>Total Score</b> | <b>Query<br/>Cover</b> | <b>E value</b> | <b>Per. Ident</b> | <b>Accession</b> |
|------------------------------------------------------------------------------------|------------------|--------------------|------------------------|----------------|-------------------|------------------|
| hypothetical protein [Leptospira interrogans]                                      | 231              | 231                | 95%                    | 2.00E-73       | 80.41%            | WP_002127204.1   |
| hypothetical protein [Leptospira interrogans]                                      | 231              | 231                | 95%                    | 2.00E-73       | 79.38%            | WP_061286495.1   |
| hypothetical protein [Leptospira interrogans]                                      | 231              | 231                | 95%                    | 3.00E-73       | 79.90%            | WP_001010185.1   |
| hypothetical protein [Leptospira]                                                  | 231              | 231                | 95%                    | 3.00E-73       | 79.90%            | WP_001010184.1   |
| hypothetical protein [Leptospira interrogans]                                      | 231              | 231                | 95%                    | 3.00E-73       | 79.38%            | WP_001010182.1   |
| hypothetical protein [Leptospira interrogans]                                      | 231              | 231                | 95%                    | 3.00E-73       | 79.90%            | WP_001010178.1   |
| hypothetical protein [Leptospira interrogans]                                      | 231              | 231                | 95%                    | 4.00E-73       | 79.90%            | WP_001010183.1   |
| hypothetical protein [Leptospira interrogans]                                      | 229              | 229                | 95%                    | 1.00E-72       | 79.38%            | WP_192505591.1   |
| leucine rich repeat protein [Leptospira interrogans serovar<br>Zanoni str. LT2156] | 218              | 218                | 92%                    | 1.00E-68       | 78.61%            | EMM97254.1       |
| hypothetical protein [Leptospira interrogans]                                      | 216              | 216                | 91%                    | 5.00E-68       | 79.03%            | MBW9228790.1     |



# ALIGNMENTS

>AFV46186.1 leucine-rich repeat protein, partial [Leptospira borgpetersenii serovar Ballum]

AFV46187.1 leucine-rich repeat protein, partial [Leptospira borgpetersenii serovar Mini]

AFV46188.1 leucine-rich repeat protein, partial [Leptospira borgpetersenii serovar Sejroe]

Length=203

Score = 358 bits (920), Expect = 6e-124, Method: Compositional matrix adjust.  
Identities = 203/203 (100%), Positives = 203/203 (100%), Gaps = 0/203 (0%)

|       |     |                                                               |     |
|-------|-----|---------------------------------------------------------------|-----|
| Query | 1   | GFVCFTASFDCKKNAEEILGEAKAKPELVQTLDFGMQKLSTVPEEVCGFNLTKLDLRLN   | 60  |
|       |     | GFVCFTASFDCKKNAEEILGEAKAKPELVQTLDFGMQKLSTVPEEVCGFNLTKLDLRLN   |     |
| Sbjct | 1   | GFVCFTASFDCKKNAEEILGEAKAKPELVQTLDFGMQKLSTVPEEVCGFNLTKLDLRLN   | 60  |
| Query | 61  | SLTFLPEFIGECKRLEQLNLFGNDLTTFPSTFSKLKNLKVLLAGNNDFTILPSELLFLPL  | 120 |
|       |     | SLTFLPEFIGECKRLEQLNLFGNDLTTFPSTFSKLKNLKVLLAGNNDFTILPSELLFLPL  |     |
| Sbjct | 61  | SLTFLPEFIGECKRLEQLNLFGNDLTTFPSTFSKLKNLKVLLAGNNDFTILPSELLFLPL  | 120 |
| Query | 121 | IKILYVDRNKLTLTETDVeilaslssleeldlslnsGIKALPFNYEKLVLNLINLKRLNIK | 180 |
|       |     | IKILYVDRNKLTLTETDVEILASLSSLEELDLSLNSGIKALPFNYEKLVLNLINLKRLNIK |     |
| Sbjct | 121 | IKILYVDRNKLTLTETDVEILASLSSLEELDLSLNSGIKALPFNYEKLVLNLINLKRLNIK | 180 |
| Query | 181 | KTSLKGEDADKLQAILPNTKIDY                                       | 203 |
|       |     | KTSLKGEDADKLQAILPNTKIDY                                       |     |
| Sbjct | 181 | KTSLKGEDADKLQAILPNTKIDY                                       | 203 |

>AL026640.1 leucine rich repeat protein [Leptospira borgpetersenii serovar Ballum]  
 ANH01207.1 leucine rich repeat protein [Leptospira borgpetersenii str. 4E]  
 EMN15214.1 leucine rich repeat protein [Leptospira borgpetersenii str. Brem 307]  
 EMN18108.1 leucine rich repeat protein [Leptospira borgpetersenii str. Brem 328]  
 PTM44326.1 leucine rich repeat (LRR) protein [Leptospira borgpetersenii serovar Javanica]  
 GIM19917.1 hypothetical protein KHM09\_23680 [Leptospira borgpetersenii]  
 Length=222

Score = 359 bits (921), Expect = 8e-124, Method: Compositional matrix adjust.  
 Identities = 203/203 (100%), Positives = 203/203 (100%), Gaps = 0/203 (0%)

|       |     |                                                                 |     |
|-------|-----|-----------------------------------------------------------------|-----|
| Query | 1   | GFVCFTASFDCKKNAEEILGEAKAKPELVQTLDFGMQKLSTVPEEVC GFPNLTKDLRLN    | 60  |
|       |     | GFVCFTASFDCKKNAEEILGEAKAKPELVQTLDFGMQKLSTVPEEVC GFPNLTKDLRLN    |     |
| Sbjct | 20  | GFVCFTASFDCKKNAEEILGEAKAKPELVQTLDFGMQKLSTVPEEVC GFPNLTKDLRLN    | 79  |
|       |     |                                                                 |     |
| Query | 61  | SLTFLPEFIGECKRLEQLNLF GNDLTTFPSTFSKLKNLKVLLAGNNDFTILPSELLFLPL   | 120 |
|       |     | SLTFLPEFIGECKRLEQLNLF GNDLTTFPSTFSKLKNLKVLLAGNNDFTILPSELLFLPL   |     |
| Sbjct | 80  | SLTFLPEFIGECKRLEQLNLF GNDLTTFPSTFSKLKNLKVLLAGNNDFTILPSELLFLPL   | 139 |
|       |     |                                                                 |     |
| Query | 121 | IKILYVDRNKLTLTETDVeilaslsleeeldslslnsGIKALPFNYEKL VNLINLKRNLNIK | 180 |
|       |     | IKILYVDRNKLTLTETDVEILASLSLEEELDSLNSGIKALPFNYEKL VNLINLKRNLNIK   |     |
| Sbjct | 140 | IKILYVDRNKLTLTETDVEILASLSLEEELDSLNSGIKALPFNYEKL VNLINLKRNLNIK   | 199 |
|       |     |                                                                 |     |
| Query | 181 | KTSLKGEDADKLQAILPNTKIDY                                         | 203 |
|       |     | KTSLKGEDADKLQAILPNTKIDY                                         |     |
| Sbjct | 200 | KTSLKGEDADKLQAILPNTKIDY                                         | 222 |

>WP\_002731979.1 MULTISPECIES: leucine-rich repeat domain-containing protein [Leptospira]  
 EMG00720.1 leucine rich repeat protein [Leptospira borgpetersenii str. 200701203]  
 EM009583.1 leucine rich repeat protein [Leptospira borgpetersenii str. Noumea 25]  
 AXX17321.1 hypothetical protein C4Q31\_14790 [Leptospira borgpetersenii serovar Ceylonica]  
 EKP15606.1 leucine rich repeat protein [Leptospira borgpetersenii str. 200801926]  
 EKQ91706.1 leucine rich repeat protein [Leptospira borgpetersenii str. UI 09149]  
 Length=215

Score = 358 bits (920), Expect = 1e-123, Method: Compositional matrix adjust.  
 Identities = 203/203 (100%), Positives = 203/203 (100%), Gaps = 0/203 (0%)

|       |    |                                                               |     |
|-------|----|---------------------------------------------------------------|-----|
| Query | 1  | GFVCFTASFDCKKNAEEILGEAKAKPELVQTLDFGMQKLSTVPEEVC GFPNLTKDLRLN  | 60  |
|       |    | GFVCFTASFDCKKNAEEILGEAKAKPELVQTLDFGMQKLSTVPEEVC GFPNLTKDLRLN  |     |
| Sbjct | 13 | GFVCFTASFDCKKNAEEILGEAKAKPELVQTLDFGMQKLSTVPEEVC GFPNLTKDLRLN  | 72  |
|       |    |                                                               |     |
| Query | 61 | SLTFLPEFIGECKRLEQLNLF GNDLTTFPSTFSKLKNLKVLLAGNNDFTILPSELLFLPL | 120 |
|       |    | SLTFLPEFIGECKRLEQLNLF GNDLTTFPSTFSKLKNLKVLLAGNNDFTILPSELLFLPL |     |
| Sbjct | 73 | SLTFLPEFIGECKRLEQLNLF GNDLTTFPSTFSKLKNLKVLLAGNNDFTILPSELLFLPL | 132 |

|       |     |                                                               |     |
|-------|-----|---------------------------------------------------------------|-----|
| Query | 121 | IKILYVDRNKLTLTETDVeilaslssleeldlslnsGIKALPFNYEKLVLNLINLKRLNIK | 180 |
|       |     | IKILYVDRNKLTLTETDVEILASLSSLEELDLSLNSGIKALPFNYEKLVLNLINLKRLNIK |     |
| Sbjct | 133 | IKILYVDRNKLTLTETDVEILASLSSLEELDLSLNSGIKALPFNYEKLVLNLINLKRLNIK | 192 |
| Query | 181 | KTSLKGEDADKLQAILPNTKIDY                                       | 203 |
|       |     | KTSLKGEDADKLQAILPNTKIDY                                       |     |
| Sbjct | 193 | KTSLKGEDADKLQAILPNTKIDY                                       | 215 |

>AFV46185.1 leucine-rich repeat protein, partial [*Leptospira borgpetersenii* serovar Javanica]  
Length=203  
Score = 354 bits (909), Expect = 3e-122, Method: Compositional matrix adjust.  
Identities = 201/203 (99%), Positives = 202/203 (99%), Gaps = 0/203 (0%)

|       |     |                                                                |     |
|-------|-----|----------------------------------------------------------------|-----|
| Query | 1   | GFVCFTASFDCKKNAEEILGEAKAKPELVQTLDFGMQKLSTVPPEEVC GFPNLTKLDLRLN | 60  |
|       |     | GF+CFTASFDCKKNAEEILGEAKAKPELVQTLDFGMQKLSTVPPEEVC GFPNLTKLDLRLN |     |
| Sbjct | 1   | GFLCFTASFDCKKNAEEILGEAKAKPELVQTLDFGMQKLSTVPPEEVC GFPNLTKLDLRLN | 60  |
| Query | 61  | SLTFLPEFIGECKRLEQLNLF GNDLTTFPSTFSKLKNLKVLLAGNNDFTILPSELLFLPL  | 120 |
|       |     | SLTFLPEFIGECKRLEQLNLF GNDLTTFPSTFSKLKNLKVLLAGNNDFTILPSELLFLPL  |     |
| Sbjct | 61  | SLTFLPEFIGECKRLEQLNLF GNDLTTFPSTFSKLKNLKVLLAGNNDFTILPSELLFLPL  | 120 |
| Query | 121 | IKILYVDRNKLTLTETDVeilaslssleeldlslnsGIKALPFNYEKLVLNLINLKRLNIK  | 180 |
|       |     | IKILYVDRNKLTLTETDVEILASLSSLEELDLSLNSGIKALPFNYEKLVLNLINLKRLNIK  |     |
| Sbjct | 121 | IKILYVDRNKLTLTETDVEILASLSSLEELDLSLNSGIKALPFNYEKLVLNLINLKRLNIK  | 180 |
| Query | 181 | KTSLKGEDADKLQAILPNTKIDY                                        | 203 |
|       |     | KTSLKGEDADKLQAIL NTKIDY                                        |     |
| Sbjct | 181 | KTSLKGEDADKLQAILRNTKIDY                                        | 203 |

>EM062774.1 leucine rich repeat protein [*Leptospira borgpetersenii* serovar Pomona str. 200901868]  
Length=215  
Score = 354 bits (908), Expect = 7e-122, Method: Compositional matrix adjust.  
Identities = 201/203 (99%), Positives = 202/203 (99%), Gaps = 0/203 (0%)

|       |     |                                                                |     |
|-------|-----|----------------------------------------------------------------|-----|
| Query | 1   | GFVCFTASFDCKKNAEEILGEAKAKPELVQTLDFGMQKLSTVPPEEVC GFPNLTKLDLRLN | 60  |
|       |     | GFVCFTASF+CKKNAEEILGEAKAKPELVQTLDFGMQKLSTVPE VCGFPNLTKLDLRLN   |     |
| Sbjct | 13  | GFVCFTASFNCKKNAEEILGEAKAKPELVQTLDFGMQKLSTVPEGVC GFPNLTKLDLRLN  | 72  |
| Query | 61  | SLTFLPEFIGECKRLEQLNLF GNDLTTFPSTFSKLKNLKVLLAGNNDFTILPSELLFLPL  | 120 |
|       |     | SLTFLPEFIGECKRLEQLNLF GNDLTTFPSTFSKLKNLKVLLAGNNDFTILPSELLFLPL  |     |
| Sbjct | 73  | SLTFLPEFIGECKRLEQLNLF GNDLTTFPSTFSKLKNLKVLLAGNNDFTILPSELLFLPL  | 132 |
| Query | 121 | IKILYVDRNKLTLTETDVeilaslssleeldlslnsGIKALPFNYEKLVLNLINLKRLNIK  | 180 |
|       |     | IKILYVDRNKLTLTETDVEILASLSSLEELDLSLNSGIKALPFNYEKLVLNLINLKRLNIK  |     |
| Sbjct | 133 | IKILYVDRNKLTLTETDVEILASLSSLEELDLSLNSGIKALPFNYEKLVLNLINLKRLNIK  | 192 |
| Query | 181 | KTSLKGEDADKLQAILPNTKIDY                                        | 203 |
|       |     | KTSLKGEDADKLQAILPNTKIDY                                        |     |
| Sbjct | 193 | KTSLKGEDADKLQAILPNTKIDY                                        | 215 |

>WP\_011669694.1 leucine-rich repeat domain-containing protein [Leptospira borgpetersenii]  
 ABJ76745.1 Leucine-rich-repeat protein [Leptospira borgpetersenii serovar Hardjo-bovis str. JB197]  
 ABJ78391.1 Leucine-rich-repeat protein [Leptospira borgpetersenii serovar Hardjo-bovis str. L550]  
 AMX57620.1 hypothetical protein LBK6\_04345 [Leptospira borgpetersenii serovar Hardjo]  
 AWW71582.1 hypothetical protein B9T54\_04730 [Leptospira borgpetersenii serovar Hardjo-bovis]  
 EMJ80931.1 leucine rich repeat protein [Leptospira borgpetersenii serovar Hardjo-bovis str. Sponselee]  
 Length=215

Score = 352 bits (903), Expect = 4e-121, Method: Compositional matrix adjust.  
 Identities = 200/203 (99%), Positives = 201/203 (99%), Gaps = 0/203 (0%)

|       |     |                                                               |     |
|-------|-----|---------------------------------------------------------------|-----|
| Query | 1   | GFVCFTASFDCKKNAEEILGEAKAKPELVQTLDFGMQKLSTVPPEEVCGFNPNTKLDLRLN | 60  |
|       |     | GFVCFTASF+CKKNAEEILGEAKAKPELVQTLDFGMQKLSTVPE VCGFPNTKLDLRLN   |     |
| Sbjct | 13  | GFVCFTASFNCKKNAEEILGEAKAKPELVQTLDFGMQKLSTVPEGVCGFPNTKLDLRLN   | 72  |
|       |     |                                                               |     |
| Query | 61  | SLTFLPEFIGECKRLEQLNLFNDLTTFPSTFSKLKNLKVLLAGNNDFTILPSELLFLPL   | 120 |
|       |     | SLTFLPEFIGECKRLEQLNLFNDLTTFPSTFSKLKNLKVLLAGNNDFTILPSELLFLPL   |     |
| Sbjct | 73  | SLTFLPEFIGECKRLEQLNLFNDLTTFPSTFSKLKNLKVLLAGNNDFTILPSELLFLPL   | 132 |
|       |     |                                                               |     |
| Query | 121 | IKILYVDRNKLTLTETDVeilaslsleeeldslslnsGIKALPFNYEKLVLNLNLRNLK   | 180 |
|       |     | IKILYVDRNKL LTETDVEILASLSLEEELDLSLNSGIKALPFNYEKLVLNLNLRNLK    |     |
| Sbjct | 133 | IKILYVDRNKLTLTETDVEILASLSLEEELDLSLNSGIKALPFNYEKLVLNLNLRNLK    | 192 |
|       |     |                                                               |     |
| Query | 181 | KTSLKGEDADKLQAILPNTKIDY                                       | 203 |
|       |     | KTSLKGEDADKLQAILPNTKIDY                                       |     |
| Sbjct | 193 | KTSLKGEDADKLQAILPNTKIDY                                       | 215 |

>WP\_002745429.1 hypothetical protein [Leptospira mayottensis]  
 AXR62112.1 hypothetical protein DQM68\_17050 [Leptospira mayottensis]  
 AXR62988.1 hypothetical protein DQM28\_00680 [Leptospira mayottensis]  
 AXR66734.1 hypothetical protein DPV73\_00510 [Leptospira mayottensis]  
 AZQ01438.1 hypothetical protein LEP1GSC190\_04660 [Leptospira mayottensis 200901116]  
 EKS00741.1 leucine rich repeat protein [Leptospira mayottensis 200901122]  
 Length=219

Score = 331 bits (849), Expect = 8e-113, Method: Compositional matrix adjust.  
 Identities = 186/203 (92%), Positives = 191/203 (94%), Gaps = 0/203 (0%)

|       |     |                                                               |     |
|-------|-----|---------------------------------------------------------------|-----|
| Query | 1   | GFVCFTASFDCKKNAEEILGEAKAKPELVQTLDFGMQKLSTVPPEEVCGFNPNTKLDLRLN | 60  |
|       |     | GF+CFTASFDCKKNAEEILGEAKAKPELVQ LDFGMQKLSTVPE VCGFPNTKLDLRLN   |     |
| Sbjct | 17  | GFICFTASFDCKKNAEEILGEAKAKPELVQILDFGMQKLSTVPEAVCGFPNTKLDLRLN   | 76  |
|       |     |                                                               |     |
| Query | 61  | SLTFLPEFIGECKRLEQLNLFNDLTTFPSTFSKLKNLKVLLAGNNDFTILPSELLFLPL   | 120 |
|       |     | SLTFLPE IGEC+RLEQLNLFNDLT PSTFSKLKNLKVLLAG NDFITLPSELLFLPL    |     |
| Sbjct | 77  | SLTFLPESIGECRRLEQLNLFNDLTALPSTFSKLKNLKVLLAGGNDFTILPSELLFLPL   | 136 |
|       |     |                                                               |     |
| Query | 121 | IKILYVDRNKLTLTETDVeilaslsleeeldslslnsGIKALPFNYEKLVLNLNLRNLK   | 180 |
|       |     | I+ LY D+NKLTLTETDVEILASLSLEEELDL+LN GIK LPFNYEKL NL NLKRLNIK  |     |
| Sbjct | 137 | IRTLYFDQNKLTLTETDVEILASLSLEEELDLNLNLGIKTLPFNYEKLRLNLNLRNLK    | 196 |

Query 181 KTSKKGEDADKLQAILPNTKIDY 203  
 KTSKKGEDADKLQAILPNTKIDY  
 Sbjct 197 KTSKKGEDADKLQAILPNTKIDY 219

>WP\_235596156.1 hypothetical protein [Leptospira weilii]  
 Length=205

Score = 330 bits (846), Expect = 1e-112, Method: Compositional matrix adjust.  
 Identities = 183/203 (90%), Positives = 194/203 (96%), Gaps = 0/203 (0%)

Query 1 GFVCFTASFDCKKNAEEILGEAKAKPELVQTLDFGMQKLSTVPEEVC GFPNLT KLDLRLN 60  
 GF+CF ASFDCKKNAEEILGEAKAKP+ +QTLDFGMQKLST+PE VCGFPNLT KLDLRLN  
 Sbjct 3 GFICFAASFDCKKNAEEILGEAKAKPKSIQTLDFGMQKLSTIPEGVC GFPNLT KLDLRLN 62

Query 61 SLTFLPEFIGECKRLEQLNLF GNDLTTFPSTFSKLKNLKVLLAGNNDFTILPSELLFLPL 120  
 SL LPEFIGEC+RLEQLNLF GNDL TFPSTFSKLKNLKVLLAG+NDF+ILPSELLFLPL  
 Sbjct 63 SLISLPEFIGECRRLEQLNLF GNDLATFPSTFSKLKNLKVLLAGSNDFSILPSELLFLPL 122

Query 121 IKILYVDRNKLTLTETDVeilaslsleeldlslnsGIKALPFNYEKL VNLINLKRLNIK 180  
 IKILYVD+NKLTLTETDVEILASLS+LEELD+LN GIK+LPFNYEKL NL NLKRLNIK  
 Sbjct 123 IKILYVDQNKLTLTETDVEILASLSNLEELDNLNLGIKSLPFNYEKLGNLTNLKRLNIK 182

Query 181 KTSKKGEDADKLQAILPNTKIDY 203  
 KTSKKGEDADKLQAILPNTKIDY  
 Sbjct 183 KTSKKGEDADKLQAILPNTKIDY 205

>EMJ66028.1 leucine rich repeat protein [Leptospira sp. P2653]  
 Length=222

Score = 328 bits (842), Expect = 1e-111, Method: Compositional matrix adjust.  
 Identities = 185/203 (91%), Positives = 193/203 (95%), Gaps = 0/203 (0%)

Query 1 GFVCFTASFDCKKNAEEILGEAKAKPELVQTLDFGMQKLSTVPEEVC GFPNLT KLDLRLN 60  
 GF+CFTASFDCKKNAEEILGEAKAK E ++TLDFGMQKLSTVPE VCGFPNLT KLDLRLN  
 Sbjct 20 GFICFTASFDCKKNAEEILGEAKAKSESIRTLD FGMQKLSTVPEGVC GFPNLT KLDLRLN 79

Query 61 SLTFLPEFIGECKRLEQLNLF GNDLTTFPSTFSKLKNLKVLLAGNNDFTILPSELLFLPL 120  
 SLT LPEFIG+CK LEQLNLF GNDL TFP TFSKLKNLKVLLAG+NDF+ILPSELLFLPL  
 Sbjct 80 SLTSLPEFIGDCKNLEQLNLF GNDLATFPPTFSKLKNLKVLLAGSNDF+ILPSELLFLPL 139

Query 121 IKILYVDRNKLTLTETDVeilaslsleeldlslnsGIKALPFNYEKL VNLINLKRLNIK 180  
 IKILYVDRNKLTLTETDVEILASLS+LEELD+LN GIK+LPFNYEKL NL NLKRLNIK  
 Sbjct 140 IKILYVDRNKLTLTETDVEILASLSNLEELDNLNLGIKSLPFNYEKLGNLTNLKRLNIK 199

Query 181 KTSKKGEDADKLQAILPNTKIDY 203  
 KTSKKGEDADKLQAILPNTKIDY  
 Sbjct 200 KTSKKGEDADKLQAILPNTKIDY 222

>WP\_004496751.1 MULTISPECIES: leucine-rich repeat domain-containing protein [Leptospira]  
 EMM72486.1 leucine rich repeat protein [Leptospira weilii str. 2006001855]  
 EKR63142.1 leucine rich repeat protein [Leptospira weilii str. 2006001853]  
 EMN43504.1 leucine rich repeat protein [Leptospira weilii str. LNT 1234]  
 MCL8266298.1 leucine-rich repeat domain-containing protein [Leptospira weilii]  
 OMI17312.1 hypothetical protein BUQ74\_11030 [Leptospira weilii serovar Heyan]  
 Length=215

Score = 328 bits (840), Expect = 1e-111, Method: Compositional matrix adjust.  
 Identities = 185/203 (91%), Positives = 193/203 (95%), Gaps = 0/203 (0%)

|       |     |                                                               |     |
|-------|-----|---------------------------------------------------------------|-----|
| Query | 1   | GFVCFTASFDCKKNAEEILGEAKAKPELVQTLDFGMQKLSTVPPEEVCGFNPNTKLDLRLN | 60  |
|       |     | GF+CFTASFDCKKNAEEILGEAKAK E ++TLDFGMQKLSTVPE VCGFPNTKLDLRLN   |     |
| Sbjct | 13  | GFICFTASFDCKKNAEEILGEAKAKSESIRTLDFGMQKLSTVPEGVCGFPNTKLDLRLN   | 72  |
|       |     |                                                               |     |
| Query | 61  | SLTFLPEFIGECKRLEQLNLFGNLTTFPSTFSKLKNLKVLLAGNNDFTILPSELLFLPL   | 120 |
|       |     | SLT LPEFIG+CK LEQLNLFGNL TFP TFSKLKNLKVLLAG+NDFTILPSELLFLPL   |     |
| Sbjct | 73  | SLTSLPEFIGDCKNLEQLNLFGNLDTFPPTFSKLKNLKVLLAGSNDFITLPSSELLFLPL  | 132 |
|       |     |                                                               |     |
| Query | 121 | IKILYVDRNKLTLTETDVeilaslsleeldlslnsGIKALPFNYEKLVLNLINLKRLNIK  | 180 |
|       |     | IKILYVDRNKLTLTETDVEILASLS+LEELD+LN GIK+LPFNYEKL NL NLKRLNIK   |     |
| Sbjct | 133 | IKILYVDRNKLTLTETDVEILASLSNLEELDNLNLGIKSLPFNYEKLGNLTNLKRLNIK   | 192 |
|       |     |                                                               |     |
| Query | 181 | KTSLKGEDADKLQAILPNTKIDY                                       | 203 |
|       |     | KTSLKGEDADKLQAILPNTKIDY                                       |     |
| Sbjct | 193 | KTSLKGEDADKLQAILPNTKIDY                                       | 215 |

>WP\_061219130.1 leucine-rich repeat domain-containing protein [Leptospira weilii]  
 Length=215

Score = 326 bits (835), Expect = 8e-111, Method: Compositional matrix adjust.  
 Identities = 184/203 (91%), Positives = 193/203 (95%), Gaps = 0/203 (0%)

|       |     |                                                               |     |
|-------|-----|---------------------------------------------------------------|-----|
| Query | 1   | GFVCFTASFDCKKNAEEILGEAKAKPELVQTLDFGMQKLSTVPPEEVCGFNPNTKLDLRLN | 60  |
|       |     | GF+CFTASFDCKKNAEEILGEAKAK E ++TLDFGMQKLSTVPE VCGFPNTKLDLRLN   |     |
| Sbjct | 13  | GFICFTASFDCKKNAEEILGEAKAKSESIRTLDFGMQKLSTVPEGVCGFPNTKLDLRLN   | 72  |
|       |     |                                                               |     |
| Query | 61  | SLTFLPEFIGECKRLEQLNLFGNLTTFPSTFSKLKNLKVLLAGNNDFTILPSELLFLPL   | 120 |
|       |     | SLT LPEFIG+CK LEQLNLFGNL TFP TFSKLKNLKVLLAG+NDFTILPSELLFLPL   |     |
| Sbjct | 73  | SLTSLPEFIGDCKNLEQLNLFGNLDTFPPTFSKLKNLKVLLAGSNDFITLPSSELLFLPL  | 132 |
|       |     |                                                               |     |
| Query | 121 | IKILYVDRNKLTLTETDVeilaslsleeldlslnsGIKALPFNYEKLVLNLINLKRLNIK  | 180 |
|       |     | IKILYVD+NKLTLTETDVEILASLS+LEELD+LN GIK+LPFNYEKL NL NLKRLNIK   |     |
| Sbjct | 133 | IKILYVDQNKLTLTETDVEILASLSNLEELDNLNLGIKSLPFNYEKLGNLTNLKRLNIK   | 192 |
|       |     |                                                               |     |
| Query | 181 | KTSLKGEDADKLQAILPNTKIDY                                       | 203 |
|       |     | KTSLKGEDADKLQAILPNTKIDY                                       |     |
| Sbjct | 193 | KTSLKGEDADKLQAILPNTKIDY                                       | 215 |

>EMN91031.1 leucine rich repeat protein [Leptospira weilii str. UI 13098]  
Length=222

Score = 325 bits (834), Expect = 1e-110, Method: Compositional matrix adjust.  
Identities = 184/203 (91%), Positives = 192/203 (95%), Gaps = 0/203 (0%)

```
Query 1 GFVCFTASFDCKKNAEEILGEAKAKPELVQTLDFGMQKLSTVPEEVCGFNLTCLDLRLN 60
        GF+CFTASFDCKKNAEEILGEAKAK E ++TLDFGMQKLSTVPE VCGFPNLTCLDLRLN
Sbjct 20 GFICFTASFDCKKNAEEILGEAKAKSESIRTLDFGMQKLSTVPEGVCGFNLTCLDLRLN 79

Query 61 SLTFLPEFIGECKRLEQLNLFGNDLTTFPSTFSKLKNLKVLLAGNNDFTILPSELLFLPL 120
        SLT LPEFIG+CK LEQLNLFGNDL TFP TFSKLKNLKVLLAG+NDFTILPSELLFLPL
Sbjct 80 SLTSLPEFIGDCKNLEQLNLFGNDLATFPPTFSKLKNLKVLLAGSNDFILPSELLFLPL 139

Query 121 IKILYVDRNKLTLTETDVeilaslsleeldslslnsGIKALPFNYEKLVLNLNLKRLNIK 180
        IKILYVDRNKLTLTETDVEILASLS+LEELDL+LN IK+LPFNYEKL NL NLKRLNIK
Sbjct 140 IKILYVDRNKLTLTETDVEILASLSNLEELDLNLNLEIKSLPFNYEKLGNLTNLKRLNIK 199

Query 181 KTSKKGEDADKLQAILPNTKIDY 203
        KTSKKGEDADKLQAILPNTKIDY
Sbjct 200 KTSKKGEDADKLQAILPNTKIDY 222
```

>WP\_026054684.1 leucine-rich repeat domain-containing protein [Leptospira weilii]  
Length=215

Score = 325 bits (832), Expect = 2e-110, Method: Compositional matrix adjust.  
Identities = 184/203 (91%), Positives = 192/203 (95%), Gaps = 0/203 (0%)

```
Query 1 GFVCFTASFDCKKNAEEILGEAKAKPELVQTLDFGMQKLSTVPEEVCGFNLTCLDLRLN 60
        GF+CFTASFDCKKNAEEILGEAKAK E ++TLDFGMQKLSTVPE VCGFPNLTCLDLRLN
Sbjct 13 GFICFTASFDCKKNAEEILGEAKAKSESIRTLDFGMQKLSTVPEGVCGFNLTCLDLRLN 72

Query 61 SLTFLPEFIGECKRLEQLNLFGNDLTTFPSTFSKLKNLKVLLAGNNDFTILPSELLFLPL 120
        SLT LPEFIG+CK LEQLNLFGNDL TFP TFSKLKNLKVLLAG+NDFTILPSELLFLPL
Sbjct 73 SLTSLPEFIGDCKNLEQLNLFGNDLATFPPTFSKLKNLKVLLAGSNDFILPSELLFLPL 132

Query 121 IKILYVDRNKLTLTETDVeilaslsleeldslslnsGIKALPFNYEKLVLNLNLKRLNIK 180
        IKILYVDRNKLTLTETDVEILASLS+LEELDL+LN IK+LPFNYEKL NL NLKRLNIK
Sbjct 133 IKILYVDRNKLTLTETDVEILASLSNLEELDLNLNLEIKSLPFNYEKLGNLTNLKRLNIK 192

Query 181 KTSKKGEDADKLQAILPNTKIDY 203
        KTSKKGEDADKLQAILPNTKIDY
Sbjct 193 KTSKKGEDADKLQAILPNTKIDY 215
```

>WP\_061217745.1 leucine-rich repeat domain-containing protein [Leptospira weilii]  
Length=215

Score = 322 bits (826), Expect = 2e-109, Method: Compositional matrix adjust.  
Identities = 183/202 (91%), Positives = 191/202 (95%), Gaps = 0/202 (0%)

```
Query 2 FVCFTASFDCKKNAEEILGEAKAKPELVQTLDFGMQKLSTVPEEVC GFPNLTKDLRLNS 61
      F+CFTASFDCKKNAEEILGEAKAK E ++TLDFGMQKLSTVPE VCGFPNLTKDLRLNS
Sbjct 14 FICFTASFDCKKNAEEILGEAKAKSESIRTLDFGMQKLSTVPEGVC GFPNLTKDLRLNS 73

Query 62 LTFLPEFIGECKRLEQLNLFGNDLTTFPSTFSKLKNLKVLLAGNNDFTILPSELLFLPLI 121
      LT LPEFIG+CK LEQLNLFGNDL TFP TFSKLKNLKVLLAG+NDFTILPSELLFLPLI
Sbjct 74 LTSLPEFIGDCKNLEQLNLFGNDLATFPPTFSKLKNLKVLLAGSNDFTILPSELLFLPLI 133

Query 122 KILYVDRNKLTLTETDVeilaslssleeldslslnsGIKALPFNYEKLVLNLINLKRLNIKK 181
      KILYVDRNKLTLTETDVEILASLS+LEELD+LN IK+LPFNYEKL NL NLKRLNIKK
Sbjct 134 KILYVDRNKLTLTETDVEILASLSNLEELDNLNLLEIKSLPFNYEKLGNLTNLKRLNIKK 193

Query 182 TSLKGEDADKLQAILPNTKIDY 203
      TSLKGEDADKLQAILPNTKIDY
Sbjct 194 TSLKGEDADKLQAILPNTKIDY 215
```

>EQA64549.1 leucine rich repeat protein [Leptospira alexanderi serovar Manhao  
3 str. L 60]  
Length=222

Score = 312 bits (800), Expect = 2e-105, Method: Compositional matrix adjust.  
Identities = 176/203 (87%), Positives = 187/203 (92%), Gaps = 0/203 (0%)

```
Query 1 GFVCFTASFDCKKNAEEILGEAKAKPELVQTLDFGMQKLSTVPEEVC GFPNLTKDLRLN 60
      GF+CFTASFDCKKNAEEILGEAKAKPELVQTLDFGMQKLSTVPE VCGFPNLTKDLRLN
Sbjct 20 GFICFTASFDCKKNAEEILGEAKAKPELVQTLDFGMQKLSTVPEGVC GFPNLTKDLRLN 79

Query 61 SLTFLPEFIGECKRLEQLNLFGNDLTTFPSTFSKLKNLKVLLAGNNDFTILPSELLFLPL 120
      SL+ LP+ IG+CK LEQLNLFGNDLTTFP+ SKLK L++LLAGNND LPSELLFLP
Sbjct 80 SLSSLPDEIGDCKNLEQLNLFGNDLTTFPAALSKLKKLRILLAGNNDLKFLPSELLFLPE 139

Query 121 IKILYVDRNKLTLTETDVeilaslssleeldslslnsGIKALPFNYEKLVLNLINLKRLNIK 180
      IK +Y+D+NKLTLTETDVEILASLSLEELD+LN GIK LPFNYEKL NL NLKRLNIK
Sbjct 140 IKTIYMDQNKLTLTETDVEILASLSLEELDNLNLGIKTLPFNYEKLGNLTNLKRLNIK 199

Query 181 KTSKKGEDADKLQAILPNTKIDY 203
      KTSKKGEDADKLQAILPNTKIDY
Sbjct 200 KTSKKGEDADKLQAILPNTKIDY 222
```



>WP\_039940928.1 hypothetical protein [Leptospira alexanderi]  
Length=215

Score = 311 bits (798), Expect = 3e-105, Method: Compositional matrix adjust.  
Identities = 176/203 (87%), Positives = 187/203 (92%), Gaps = 0/203 (0%)

```
Query 1 GFVCFTASFDCKKNAEEILGEAKAKPELVQTLDFGMQKLSTVPEEVC GFPNLT KDLRLN 60
        GF+CFTASFDCKKNAEEILGEAKAKPELVQTLDFGMQKLSTVPE VCGFPNLT KDLRLN
Sbjct 13 GFICFTASFDCKKNAEEILGEAKAKPELVQTLDFGMQKLSTVPEGVC GFPNLT KDLRLN 72

Query 61 SLTFLPEFIGECKRLEQLNLF GNDLTTFPSTF SKLKNLKVLLAGNNDFTILPSELLFLPL 120
        SL+ LP+ IG+CK LEQLNLF GNDLTTFP+ SKLK L++LLAGNND LPSELLFLP
Sbjct 73 SLSSLPDEIGDCKNLEQLNLF GNDLTTFPAALSKLKKLRILLAGNNDLKFLPSELLFLPE 132

Query 121 IKILYVDRNKLTLTETDVeilaslssleeldslnsGIKALPFNYEKL VNLINLKRLNIK 180
        IK +Y+D+NKLTLTETDVEILASLSSLEELD+LN GIK LPFNYEKL NL NLKRLNIK
Sbjct 133 IKTIYMDQNKLTLTETDVEILASLSSLEELDNLNLGIKTLPFNYEKLGNLTNLKRLNIK 192

Query 181 KTSKKGEDADKLQAILPNTKIDY 203
        KTSKKGEDADKLQAILPNTKIDY
Sbjct 193 KTSKKGEDADKLQAILPNTKIDY 215
```

>WP\_078124592.1 hypothetical protein [Leptospira alexanderi]  
Length=215

Score = 309 bits (791), Expect = 4e-104, Method: Compositional matrix adjust.  
Identities = 175/203 (86%), Positives = 186/203 (92%), Gaps = 0/203 (0%)

```
Query 1 GFVCFTASFDCKKNAEEILGEAKAKPELVQTLDFGMQKLSTVPEEVC GFPNLT KDLRLN 60
        GF+CFTASFDCKKNAEEILGEAKAKPELVQTLDFGMQKLSTVPE VCGFPNLT KDLRLN
Sbjct 13 GFICFTASFDCKKNAEEILGEAKAKPELVQTLDFGMQKLSTVPEGVC GFPNLT KDLRLN 72

Query 61 SLTFLPEFIGECKRLEQLNLF GNDLTTFPSTF SKLKNLKVLLAGNNDFTILPSELLFLPL 120
        SL+ LP+ IG+CK LEQLNLF GNDLTTFP+ SKLK L++LLAGNND LPSELLFLP
Sbjct 73 SLSSLPDEIGDCKNLEQLNLF GNDLTTFPAALSKLKKLRILLAGNNDLKFLPSELLFLPE 132

Query 121 IKILYVDRNKLTLTETDVeilaslssleeldslnsGIKALPFNYEKL VNLINLKRLNIK 180
        IK +Y+D+NKLTLTETDVEILASLSSLEELD+LN GIK LPFNYEKL NL NLKRLNIK
Sbjct 133 IKTIYMDQNKLTLTETDVEILASLSSLEELDNLNLGIKTLPFNYEKLGNLTNLKRLNIK 192

Query 181 KTSKKGEDADKLQAILPNTKIDY 203
        KTSKKG DADKLQAILPNTKIDY
Sbjct 193 KTSKGGDADKLQAILPNTKIDY 215
```

>WP\_004466481.1 leucine-rich repeat domain-containing protein [Leptospira santarosai]  
EMM76134.1 leucine rich repeat protein [Leptospira santarosai str. 2000030832]  
Length=217

Score = 307 bits (787), Expect = 2e-103, Method: Compositional matrix adjust.  
Identities = 177/205 (86%), Positives = 184/205 (90%), Gaps = 2/205 (1%)

```
Query 1 GFVCFTASF--DCKKNAEEILGEAKAKPELVQTLDFGMQKLSTVPPEVCGFPNLTKDLR 58
        GF+CFTAS DCKKN EEIL EAKA+PE VQTLDFGM+KLS VPE VCGFPNLTKDLR
Sbjct 13 GFICFTASLEIDCKKNTEEILEEAKARPESVQTLDFGMRKLSAVPEGVCGFPNLTKDLR 72

Query 59 LNSLTFLPEFIGECKRLEQLNLFNDLTTFSTFSKLKLNKVLLAGNNDFTILPSELLFL 118
        LNSLT LPEFIGECK LEQLNLFNDLTTFSTFSKLKLNKVLLAG+NDFT+LPSELLFL
Sbjct 73 LNSLTSLPEFIGECKSLEQLNLFNDLTTFSTFSKLKLNKVLLAGSNDFTVLPSELLFL 132

Query 119 PLIKILYVDRNKLTLTETDVeilaslssleeldlslnsGIKALPFNYEKLVLNLINKRLN 178
        P IK LYVDRN+LTLTETDVEILASLSSLEELD+ NSGI LPFNYEKL NL LKRLN
Sbjct 133 PSIKTLYVDRNRLTLTETDVEILASLSSLEELDNLQNSGIGTLPFNYEKLRLNLTGLKRLN 192

Query 179 IKKTSLKGEDADKLQAILPNTKIDY 203
        IKKTSLKGEDA KLQAILPN KIDY
Sbjct 193 IKKTSLKGEDAGKLQAILPNAKIDY 217
```

>WP\_046692451.1 leucine-rich repeat domain-containing protein [Leptospira santarosai]  
AVQ11281.1 Leucine rich repeat protein [Leptospira santarosai]  
Length=217

Score = 306 bits (785), Expect = 4e-103, Method: Compositional matrix adjust.  
Identities = 176/205 (86%), Positives = 184/205 (90%), Gaps = 2/205 (1%)

```
Query 1 GFVCFTASF--DCKKNAEEILGEAKAKPELVQTLDFGMQKLSTVPPEVCGFPNLTKDLR 58
        GF+CFTAS DCKKN EEIL EAKA+PE VQTLDFGM+KLS VPE VCGFPNL KDLR
Sbjct 13 GFICFTASLEIDCKKNTEEILEEAKARPESVQTLDFGMRKLSAVPEGVCGFPNLIKDLR 72

Query 59 LNSLTFLPEFIGECKRLEQLNLFNDLTTFSTFSKLKLNKVLLAGNNDFTILPSELLFL 118
        LNSLT LPEFIGECKRLEQLNLFNDLTTFSTFSKLKLNKVLL G+NDFT+LPSELLFL
Sbjct 73 LNSLTSLPEFIGECKRLEQLNLFNDLTTFSTFSKLKLNKVLLVGSNDFTVLPSELLFL 132

Query 119 PLIKILYVDRNKLTLTETDVeilaslssleeldlslnsGIKALPFNYEKLVLNLINKRLN 178
        P IK LYVDRN+LTLTETDVEILASLSSLEELD+ NSGI+ LPFNYEKL NL LKRLN
Sbjct 133 PSIKTLYVDRNRLTLTETDVEILASLSSLEELDNLQNSGIETLPFNYEKLRLNLTGLKRLN 192

Query 179 IKKTSLKGEDADKLQAILPNTKIDY 203
        IKKTSLKGEDA KLQAILPN KIDY
Sbjct 193 IKKTSLKGEDAGKLQAILPNAKIDY 217
```

>EKT85788.2 hypothetical protein LSS\_15741 [Leptospira santarosai serovar  
Shermani str. LT 821]  
Length=224

Score = 305 bits (782), Expect = 1e-102, Method: Compositional matrix adjust.  
Identities = 176/205 (86%), Positives = 183/205 (89%), Gaps = 2/205 (1%)

|       |     |                                                               |     |
|-------|-----|---------------------------------------------------------------|-----|
| Query | 1   | GFVCFTASF--DCKKNAEEILGEAKAKPELVQTLDFGMQKLSTVPPEVCGFPNLTKDLR   | 58  |
|       |     | GF+CFTAS DCKKN EEIL EAKA+PE VQTLDFGM+KLS VPE VCGFPNL KDLR     |     |
| Sbjct | 20  | GFICFTASLEIDCKKNTEEILEEAKARPESVQTLDFGMRKLSAVPEGVCGFPNLIKDLR   | 79  |
| Query | 59  | LNSLTFLPEFIGECKRLEQLNLFGNLTTFPSTFSKLKNLKVLLAGNNDFTILPSELLFL   | 118 |
|       |     | LNSLT LPEFIGECK LEQLNLFGNLTT PSTFSKLKNLKVLLAG+NDFT+LPSELLFL   |     |
| Sbjct | 80  | LNSLTSLPEFIGECKSLEQLNLFGNLTTLPSTFSKLKNLKVLLAGSNDFTVLPSELLFL   | 139 |
| Query | 119 | PLIKILYVDRNKLTLTETDVeilaslssleeIdlslnsGIKALPFNYEKLVLNLINLKRLN | 178 |
|       |     | P IK LYVDRN+LTLTETDVEILASLSSLEELD+ NSGI LPFNYEKL NL LKRLN     |     |
| Sbjct | 140 | PSIKTLYVDRNRLTLTETDVEILASLSSLEELDNLQNSGIGTLPFNYEKLRLNLTGLKRLN | 199 |
| Query | 179 | IKKTSLKGEDADKLQAILPNTKIDY                                     | 203 |
|       |     | IKKTSLKGEDA KLQAILPN KIDY                                     |     |
| Sbjct | 200 | IKKTSLKGEDAGKLQAILPNAKIDY                                     | 224 |

>WP\_004471631.1 MULTISPECIES: leucine-rich repeat domain-containing protein [Leptospira]

ASV13101.1 hypothetical protein B2G51\_00410 [Leptospira santarosai]  
EK079664.1 leucine rich repeat protein [Leptospira sp. Fiocruz LV3954]  
EKS08892.1 leucine rich repeat protein [Leptospira santarosai str. JET]  
EMI62768.1 leucine rich repeat protein [Leptospira sp. Fiocruz LV4135]  
EMN21750.1 leucine rich repeat protein [Leptospira santarosai serovar Arenal str. MAVJ 401]  
Length=217

Score = 305 bits (781), Expect = 2e-102, Method: Compositional matrix adjust.  
Identities = 176/205 (86%), Positives = 183/205 (89%), Gaps = 2/205 (1%)

|       |     |                                                               |     |
|-------|-----|---------------------------------------------------------------|-----|
| Query | 1   | GFVCFTASF--DCKKNAEEILGEAKAKPELVQTLDFGMQKLSTVPPEEVCGFPNLTKLDLR | 58  |
|       |     | GF+CFTAS DCKKN EEIL EAKA+PE VQTLDFGM+KLS VPE VCGFPNL KLDLR    |     |
| Sbjct | 13  | GFICFTASLEIDCKKNTEEILEEAKARPESVQTLDFGMRLSAVPEGVCGFPNLIKLDLR   | 72  |
| Query | 59  | LNSLTFLPEFIGECKRLEQLNLFGNLTTFPSTFSKLKNLKVLLAGNNDFTILPSELLFL   | 118 |
|       |     | LNSLT LPEFIGECK LEQLNLFGNLTT PSTFSKLKNLKVLLAG+NDFT+LPSELLFL   |     |
| Sbjct | 73  | LNSLTSLPEFIGECKSLEQLNLFGNLTTLPSTFSKLKNLKVLLAGSNDFTVLPSELLFL   | 132 |
| Query | 119 | PLIKILYVDRNKLTLTETDVeilaslssleeldslnsGIKALPFNYEKLVLNLINLKRNL  | 178 |
|       |     | P IK LYVDRN+LTLTETDVEILASLSSLEELD+ NSGI LPFNYEKL NL LKRNL     |     |
| Sbjct | 133 | PSIKTLYVDRNRLTLTETDVEILASLSSLEELDNLQNSGIGTLPFNYEKLRLNLTKLRNL  | 192 |
| Query | 179 | IKKTSLKGEDADKLQAILPNTKIDY                                     | 203 |
|       |     | IKKTSLKGEDA KLQAILPN KIDY                                     |     |
| Sbjct | 193 | IKKTSLKGEDAGKLQAILPNAKIDY                                     | 217 |

>WP\_061216203.1 leucine-rich repeat domain-containing protein [Leptospira santarosai]  
Length=217

Score = 305 bits (781), Expect = 2e-102, Method: Compositional matrix adjust.  
Identities = 176/205 (86%), Positives = 183/205 (89%), Gaps = 2/205 (1%)

|       |     |                                                               |     |
|-------|-----|---------------------------------------------------------------|-----|
| Query | 1   | GFVCFTASF--DCKKNAEEILGEAKAKPELVQTLDFGMQKLSTVPPEEVCGFPNLTKLDLR | 58  |
|       |     | GF+CFTAS DCKKN EEIL EAKA+PE VQTLDFGM+KLS VPE VCGFPNL KLDLR    |     |
| Sbjct | 13  | GFICFTASLEIDCKKNTEEILEEAKARPESVQTLDFGMRLSAVPEGVCGFPNLIKLDLR   | 72  |
| Query | 59  | LNSLTFLPEFIGECKRLEQLNLFGNLTTFPSTFSKLKNLKVLLAGNNDFTILPSELLFL   | 118 |
|       |     | LNSLT LPEFIGECK LEQLNLFGNLTT PSTFSKLKNLKVLLAG+NDFT+LPSELLFL   |     |
| Sbjct | 73  | LNSLTSLPEFIGECKSLEQLNLFGNLTTLPSTFSKLKNLKVLLAGSNDFTVLPSELLFL   | 132 |
| Query | 119 | PLIKILYVDRNKLTLTETDVeilaslssleeldslnsGIKALPFNYEKLVLNLINLKRNL  | 178 |
|       |     | P IK LYVDRN+LTLTETDVEILASLSSLEELD+ NSGI LPFNYEKL NL LKRNL     |     |
| Sbjct | 133 | PSIKTLYVDRNRLTLTETDVEILASLSSLEELDNLQNSGIGTLPFNYEKLRLNLTKLRNL  | 192 |
| Query | 179 | IKKTSLKGEDADKLQAILPNTKIDY                                     | 203 |
|       |     | IKKTSLKGEDA KLQAILPN KIDY                                     |     |
| Sbjct | 193 | IKKTSLKGEDAGKLQAILPNVKIDY                                     | 217 |

>WP\_004492778.1 leucine-rich repeat domain-containing protein [Leptospira santarosai]  
EMF91397.1 leucine rich repeat protein [Leptospira santarosai str. ST188]  
Length=217

Score = 304 bits (779), Expect = 3e-102, Method: Compositional matrix adjust.  
Identities = 176/205 (86%), Positives = 183/205 (89%), Gaps = 2/205 (1%)

```
Query 1 GFVCFTASF--DCKKNAEEILGEAKAKPELVQTLDFGMQKLSTVPPEVCGFPNLTKDLR 58
        GF+CFTAS DCKKN EEIL EAKA+PE VQTLDFGM+KLS VPE VCGFPNL KDLR
Sbjct 13 GFICFTASLEIDCKKNTEEILEEAKARPESVQTLDFGMRKLSEVPEGVCGFPNLIKDLR 72

Query 59 LNSLTFLPEFIGECKRLEQLNLFGNDLTTFPSTFSKLKLNKVLLAGNNDFTILPSELLFL 118
        LNSLT LPEFIGECK LEQLNLFGNDLTTFSTFSKLKLNKVLLAG+NDFT+LPSELLFL
Sbjct 73 LNSLTSLPEFIGECKSLEQLNLFGNDLTTLPTFSKLKLNKVLLAGSNDFTVLPSELLFL 132

Query 119 PLIKILYVDRNKLTLTETDVeilaslssleeldlslnsGIKALPFNYEKLVLNLINKRLN 178
        P IK LYVDRN+LTLTETDVEILASLSSLEELD+ NSGI LPFNYEKL NL LKRLN
Sbjct 133 PSIKTLYVDRNRLTLTETDVEILASLSSLEELDNLQNSGIGTLPFNYEKLRLNTGLKRLN 192

Query 179 IKKTSLKGEDADKLQAILPNTKIDY 203
        IKKTSLKGEDA KLQAILPN KIDY
Sbjct 193 IKKTSLKGEDAGKLQAILPNAKIDY 217
```

>EM058507.1 leucine rich repeat protein [Leptospira santarosai str. CBC1416]  
Length=224

Score = 305 bits (780), Expect = 3e-102, Method: Compositional matrix adjust.  
Identities = 175/205 (85%), Positives = 183/205 (89%), Gaps = 2/205 (1%)

```
Query 1 GFVCFTASF--DCKKNAEEILGEAKAKPELVQTLDFGMQKLSTVPPEVCGFPNLTKDLR 58
        GF+CFTAS DCKKN EEIL EAKA+PE VQTLDFGM+KLS VPE VCGFPNL KDLR
Sbjct 20 GFICFTASLEIDCKKNTEEILEEAKARPESVQTLDFGMRKLSAVPEGVCGFPNLIKDLR 79

Query 59 LNSLTFLPEFIGECKRLEQLNLFGNDLTTFPSTFSKLKLNKVLLAGNNDFTILPSELLFL 118
        LNSLT LPEFIGECK LEQLNLFGNDLTTFSTFSKLKLN+VLLAG+NDFT+LPSELLFL
Sbjct 80 LNSLTSLPEFIGECKSLEQLNLFGNDLTTLPTFSKLKLNQVLLAGSNDFTVLPSELLFL 139

Query 119 PLIKILYVDRNKLTLTETDVeilaslssleeldlslnsGIKALPFNYEKLVLNLINKRLN 178
        P IK LYVDRN+LTLTETDVEILASLSSLEELD+ NSGI LPFNYEKL NL LKRLN
Sbjct 140 PSIKTLYVDRNRLTLTETDVEILASLSSLEELDNLQNSGIGTLPFNYEKLRLNTGLKRLN 199

Query 179 IKKTSLKGEDADKLQAILPNTKIDY 203
        IKKTSLKGEDA KLQAILPN KIDY
Sbjct 200 IKKTSLKGEDAGKLQAILPNAKIDY 224
```

>WP\_004468285.1 leucine-rich repeat domain-containing protein [Leptospira santarosai]  
EK033314.1 leucine rich repeat protein [Leptospira santarosai str. MOR084]  
EMM87883.1 leucine rich repeat protein [Leptospira santarosai str. 2000027870]  
EM012096.1 leucine rich repeat protein [Leptospira santarosai str. CBC523]  
EM021776.1 leucine rich repeat protein [Leptospira santarosai str. HAI134]  
Length=217

Score = 304 bits (779), Expect = 4e-102, Method: Compositional matrix adjust.  
Identities = 175/205 (85%), Positives = 183/205 (89%), Gaps = 2/205 (1%)

|       |     |                                                              |     |
|-------|-----|--------------------------------------------------------------|-----|
| Query | 1   | GFVCFTASF--DCKKNAEEILGEAKAKPELVQTLDFGMQKLSTVPPEVCGFPNLTKLDLR | 58  |
|       |     | GF+CFTAS DCKKN EEIL EAKA+PE VQTLDFGM+KLS VPE VCGFPNL KLDLR   |     |
| Sbjct | 13  | GFICFTASLEIDCKKNTEEILEEAKARPESVQTLDFGMRLSAVPEGVCGFPNLIKLDLR  | 72  |
| Query | 59  | LNSLTFLPEFIGECKRLEQLNLFGNLTTFPSTFSKLKNLVLLAGNNDFTILPSELLFL   | 118 |
|       |     | LNSLT LPEFIGECK LEQLNLFGNLTT PSTFSKLKNL+VLLAG+NDFT+LPSELLFL  |     |
| Sbjct | 73  | LNSLTSLPEFIGECKSLEQLNLFGNLTTLPSTFSKLKNLQVLLAGSNDFTVLPSELLFL  | 132 |
| Query | 119 | PLIKILYVDRNKLTLTETDVeilaslssleeldlslnsGIKALPFNYEKLVLNLINKRLN | 178 |
|       |     | P IK LYVDRN+LTLTETDVEILASLSSLEELD+ NSGI LPFNYEKL NL LKRLN    |     |
| Sbjct | 133 | PSIKTLYVDRNRLTLTETDVEILASLSSLEELDNLQNSGIGTLPFNYEKLRLNLTKLRLN | 192 |
| Query | 179 | IKKTSKKGEDADKLQAILPNTKIDY                                    | 203 |
|       |     | IKKTSKKGEDA KLQAILPN KIDY                                    |     |
| Sbjct | 193 | IKKTSKKGEDAGKLQAILPNAKIDY                                    | 217 |

>WP\_004486481.1 leucine-rich repeat domain-containing protein [Leptospira santarosai]  
EMJ51727.1 leucine rich repeat protein [Leptospira santarosai str. HAI1349]  
EM043962.1 leucine rich repeat protein [Leptospira santarosai str. ZUN179]  
EMP80142.1 leucine rich repeat protein [Leptospira santarosai str. CBC1531]  
Length=217

Score = 303 bits (777), Expect = 6e-102, Method: Compositional matrix adjust.  
Identities = 174/205 (85%), Positives = 183/205 (89%), Gaps = 2/205 (1%)

|       |     |                                                              |     |
|-------|-----|--------------------------------------------------------------|-----|
| Query | 1   | GFVCFTASF--DCKKNAEEILGEAKAKPELVQTLDFGMQKLSTVPPEVCGFPNLTKLDLR | 58  |
|       |     | GF+CFTAS DCKKN EEIL EAKA+PE +QTLDFGM+KLS VPE VCGFPNL KLDLR   |     |
| Sbjct | 13  | GFICFTASLEIDCKKNTEEILEEAKARPESIQTLDFGMRLSAVPEGVCGFPNLIKLDLR  | 72  |
| Query | 59  | LNSLTFLPEFIGECKRLEQLNLFGNLTTFPSTFSKLKNLVLLAGNNDFTILPSELLFL   | 118 |
|       |     | LNSLT LPEFIGECK LEQLNLFGNLTT PSTFSKLKNL+VLLAG+NDFT+LPSELLFL  |     |
| Sbjct | 73  | LNSLTSLPEFIGECKSLEQLNLFGNLTTLPSTFSKLKNLQVLLAGSNDFTVLPSELLFL  | 132 |
| Query | 119 | PLIKILYVDRNKLTLTETDVeilaslssleeldlslnsGIKALPFNYEKLVLNLINKRLN | 178 |
|       |     | P IK LYVDRN+LTLTETDVEILASLSSLEELD+ NSGI LPFNYEKL NL LKRLN    |     |
| Sbjct | 133 | PSIKTLYVDRNRLTLTETDVEILASLSSLEELDNLQNSGIGTLPFNYEKLRLNLTKLRLN | 192 |
| Query | 179 | IKKTSKKGEDADKLQAILPNTKIDY                                    | 203 |
|       |     | IKKTSKKGEDA KLQAILPN KIDY                                    |     |
| Sbjct | 193 | IKKTSKKGEDAGKLQAILPNAKIDY                                    | 217 |

>WP\_004473752.1 leucine-rich repeat domain-containing protein [Leptospira santarosai]  
 AVV50234.1 Leucine rich repeat protein [Leptospira santarosai]  
 AVV80614.1 Leucine rich repeat protein [Leptospira santarosai]  
 EM070761.1 leucine rich repeat protein [Leptospira santarosai str. 200403458]  
 EM099203.1 leucine rich repeat protein [Leptospira santarosai str. 200702252]  
 KXZ30505.1 hypothetical protein AYB33\_17160 [Leptospira santarosai]  
 Length=217

Score = 303 bits (776), Expect = 8e-102, Method: Compositional matrix adjust.  
 Identities = 175/205 (85%), Positives = 182/205 (89%), Gaps = 2/205 (1%)

|       |     |                                                                |     |
|-------|-----|----------------------------------------------------------------|-----|
| Query | 1   | GFVCFTASF--DCKKNAEEILGEAKAKPELVQTLDFGMQKLSTVPPEEVCGFPNLTKLDLR  | 58  |
|       |     | GF+CFTA DCKKN EEIL EAKA+PE VQTLDFGM+KLS VPE VCGFPNL KLDLR      |     |
| Sbjct | 13  | GFICFTAGLEIDCKKNTEEILEEAKARPESVQTLDFGMRKLSAVPEGVCGFPNLIKLDLR   | 72  |
|       |     |                                                                |     |
| Query | 59  | LNSLTFLPEFIGECKRLEQLNLF GNDLTTFSTFSKLKLNKVLLAGNNDFTILPSELLFL   | 118 |
|       |     | LNSLT LPEFIGECK LEQLNLF GNDLTTFSTFSKLKLNKVLLAG+NDFT+LPSELLFL   |     |
| Sbjct | 73  | LNSLTSLPEFIGECKSLEQLNLF GNDLTTLPTFSKLKLNKVLLAGSNDFTVLPSELLFL   | 132 |
|       |     |                                                                |     |
| Query | 119 | PLIKILYVDRNKLTLTETDVeilaslssleeldslslnsGIKALPFNYEKL VNLINLKRLN | 178 |
|       |     | P IK LYVDRN+LTLTETDVEILASLSSLEELD+ NSGI LPFNYEKL NL LKRLN      |     |
| Sbjct | 133 | PSIKTLYVDRNRLLTETDVEILASLSSLEELDNLQNSGIGTLPFNYEKLRLNLTGLKRLN   | 192 |
|       |     |                                                                |     |
| Query | 179 | IKKTSKLGEDADKLQAILPNTKIDY                                      | 203 |
|       |     | IKKTSKLGEDA KLQAILPN KIDY                                      |     |
| Sbjct | 193 | IKKTSKLGEDAGKLQAILPNAKIDY                                      | 217 |

>WP\_004476114.1 leucine-rich repeat domain-containing protein [Leptospira santarosai]  
 EKR92365.1 leucine rich repeat protein [Leptospira santarosai str. CBC379]  
 EM032349.1 leucine rich repeat protein [Leptospira santarosai str. HAI821]  
 EMP02889.1 leucine rich repeat protein [Leptospira santarosai str. HAI1380]  
 Length=217

Score = 302 bits (774), Expect = 2e-101, Method: Compositional matrix adjust.  
 Identities = 174/205 (85%), Positives = 182/205 (89%), Gaps = 2/205 (1%)

|       |     |                                                                |     |
|-------|-----|----------------------------------------------------------------|-----|
| Query | 1   | GFVCFTASF--DCKKNAEEILGEAKAKPELVQTLDFGMQKLSTVPPEEVCGFPNLTKLDLR  | 58  |
|       |     | GF+CFTA DCKKN EEIL EAKA+PE VQTLDFGM+KLS VPE VCGFPNL KLDLR      |     |
| Sbjct | 13  | GFICFTAGLEIDCKKNTEEILEEAKARPESVQTLDFGMRKLSAVPEGVCGFPNLIKLDLR   | 72  |
|       |     |                                                                |     |
| Query | 59  | LNSLTFLPEFIGECKRLEQLNLF GNDLTTFSTFSKLKLNKVLLAGNNDFTILPSELLFL   | 118 |
|       |     | LNSLT LPEFIGECK LEQLNLF GNDLTTFSTFSKLKLN+VLLAG+NDFT+LPSELLFL   |     |
| Sbjct | 73  | LNSLTSLPEFIGECKSLEQLNLF GNDLTTLPTFSKLKLNQVLLAGSNDFTVLPSELLFL   | 132 |
|       |     |                                                                |     |
| Query | 119 | PLIKILYVDRNKLTLTETDVeilaslssleeldslslnsGIKALPFNYEKL VNLINLKRLN | 178 |
|       |     | P IK LYVDRN+LTLTETDVEILASLSSLEELD+ NSGI LPFNYEKL NL LKRLN      |     |
| Sbjct | 133 | PSIKTLYVDRNRLLTETDVEILASLSSLEELDNLQNSGIGTLPFNYEKLRLNLTGLKRLN   | 192 |
|       |     |                                                                |     |
| Query | 179 | IKKTSKLGEDADKLQAILPNTKIDY                                      | 203 |
|       |     | IKKTSKLGEDA KLQAILPN KIDY                                      |     |
| Sbjct | 193 | IKKTSKLGEDAGKLQAILPNAKIDY                                      | 217 |

>EMF79993.1 leucine rich repeat protein [Leptospira weilii serovar Topaz

str. LT2116]  
Length=185

Score = 294 bits (753), Expect = 1e-98, Method: Compositional matrix adjust.  
Identities = 167/185 (90%), Positives = 177/185 (96%), Gaps = 0/185 (0%)

```
Query 19  LG EAKAKPELVQTLD FGMQKLSTVPEE VCGFPNLTKDLRLNSLTFLPEFIGECKRLEQL 78
          +GEAKAKPE +QTLD FGMQKLST+PE VCGFPNLTKDLRLNSLT LPEFIGEC+RLEQL
Sbjct 1  MGEAKAKPESIQTLDFGMQKLSTIPEGVCGFPNLTKDLRLNSLTSLPEFIGECRRLEQL 60

Query 79  NLFGNDLTTFPSTFSKLK NLKVLLAGNNDFTILPSELLFLPLIKILYVDRNKLTLTETDV 138
          NLFGNDL TFPSTFSKLK NLKVLLAG+NDF+ILPSELLFLPLIKILYVD+NKLTLTETDV
Sbjct 61  NLFGNDLATFPSTFSKLK NLKVLLAGSNDFSILPSELLFLPLIKILYVDQNKLTLTETDV 120

Query 139 eilaslsleeeldslslnsGIKALPFNYEKL VNLINLKRLNIKKTSLKGEDADKLQAILPN 198
          EILASLS+LEELD L+LN GIK+LPFNYEKL NL NLKRLNIKKTSLKGEDA KLQAILPN
Sbjct 121 EILASLSNLEELD LNLNLGIKSLPFNYEKLGNLTNLKRLNIKKTSLKGEDAYKLQAILPN 180

Query 199 TKIDY 203
          TKIDY
Sbjct 181 TKIDY 185
```

>EMY13797.1 leucine rich repeat protein [Leptospira weilii str. Ecochallenge]  
Length=185

Score = 290 bits (742), Expect = 4e-97, Method: Compositional matrix adjust.  
Identities = 167/185 (90%), Positives = 175/185 (95%), Gaps = 0/185 (0%)

```
Query 19  LG EAKAKPELVQTLD FGMQKLSTVPEE VCGFPNLTKDLRLNSLTFLPEFIGECKRLEQL 78
          +GEAKAK E ++TLDFGMQKLSTVPE VCGFPNLTKDLRLNSLT LPEFIG+CK LEQL
Sbjct 1  MGEAKAKSESIRTLD FGMQKLSTVPEGVCGFPNLTKDLRLNSLTSLPEFIGDCKNLEQL 60

Query 79  NLFGNDLTTFPSTFSKLK NLKVLLAGNNDFTILPSELLFLPLIKILYVDRNKLTLTETDV 138
          NLFGNDL TFP TFSKLK NLKVLLAG+NDF+ILPSELLFLPLIKILYVDRNKLTLTETDV
Sbjct 61  NLFGNDLATFPPTFSKLK NLKVLLAGSNDFILPSELLFLPLIKILYVDRNKLTLTETDV 120

Query 139 eilaslsleeeldslslnsGIKALPFNYEKL VNLINLKRLNIKKTSLKGEDADKLQAILPN 198
          EILASLS+LEELD L+LN GIK+LPFNYEKL NL NLKRLNIKKTSLKGEDADKLQAILPN
Sbjct 121 EILASLSNLEELD LNLNLGIKSLPFNYEKLGNLTNLKRLNIKKTSLKGEDADKLQAILPN 180

Query 199 TKIDY 203
          TKIDY
Sbjct 181 TKIDY 185
```

>WP\_100761136.1 leucine-rich repeat domain-containing protein [Leptospira barantonii]  
PJZ59167.1 hypothetical protein CH367\_03875 [Leptospira barantonii]  
Length=217

Score = 289 bits (739), Expect = 4e-96, Method: Compositional matrix adjust.  
Identities = 165/195 (85%), Positives = 176/195 (90%), Gaps = 0/195 (0%)

```
Query 9  FDCKKNAEEILGEAKAKPELVQTLD FGMQKLSTVPEE VCGFPNLTKDLRLNSLTFLPEF 68
          DCKKNAEEIL EAKAKPE VQ LD GMQKL+ VPE VCGFP+LTKDLRLNSLT LPEF
```



|       |     |                                                               |     |
|-------|-----|---------------------------------------------------------------|-----|
| Sbjct | 23  | IDCKKNAEEILEEAKAKPESVQVLDLGMQKLTAVPESVCGFPSLTKDLRLNSLTSLPEF   | 82  |
| Query | 69  | IGECKRLEQLNLFGNDLTTFPSTFSKLKLNKVLLAGNNDFTILPSELLFLPLIKILYVDR  | 128 |
|       |     | IGECK LEQLNLFGNDLT+ PS+FSKLKLNKVLLAG+ND T+LPSELLFLPLIK LY+D+  |     |
| Sbjct | 83  | IGECKNLEQLNLFGNDLTSIPSSFSKLKLNKVLLAGSNDLTVLPSELLFLPLIKTLYLDQ  | 142 |
| Query | 129 | NKLTLTETDVeilaslssleeldslslnsGIKALPFNYEKLVLNINLKRLNIKKTSLKGED | 188 |
|       |     | NKL L ETDVEILASLS LEELDL+LNSGIKALP NYEKL +L LKRLNIKKTSLKGED   |     |
| Sbjct | 143 | NKLVLNETDVEILASLSGLEELDLNLSGIKALPSNYEKLKSLTRLKRLNIKKTSLKGED   | 202 |
| Query | 189 | ADKLQAILPNTKIDY 203                                           |     |
|       |     | ADKLQA+LPNTKIDY                                               |     |
| Sbjct | 203 | ADKLQALLPNTKIDY 217                                           |     |

>WP\_123179347.1 leucine-rich repeat domain-containing protein [Leptospira kmetyi]  
AYV55126.1 hypothetical protein EFP84\_06105 [Leptospira kmetyi]  
Length=217

Score = 280 bits (716), Expect = 1e-92, Method: Compositional matrix adjust.  
Identities = 160/195 (82%), Positives = 172/195 (88%), Gaps = 0/195 (0%)

|       |     |                                                               |     |
|-------|-----|---------------------------------------------------------------|-----|
| Query | 9   | FDCKKNAEEILGEAKAKPELVQTLDFGMQKLSTVPEEVCGFNLTCLDLRLNSLTFLPEF   | 68  |
|       |     | DCKKNA E+L EAKAKPE VQTLG GMQKL+ VPE VC FPNLTCLDLRLNSLT LP+    |     |
| Sbjct | 23  | IDCKKNAGEVLEEAKAKPESVQTLDFGMQKLTAVPEGVCAFPNLTCLDLRLNSLTVLPDS  | 82  |
| Query | 69  | IGECKRLEQLNLFGNDLTTFPSTFSKLKLNKVLLAGNNDFTILPSELLFLPLIKILYVDR  | 128 |
|       |     | IGECK LEQLNLFGNDLT+ PS+FSKLKLNKVLLAG+ND T+LPSELLFLP I+ LY+D+  |     |
| Sbjct | 83  | IGECKNLEQLNLFGNDLTSIPSSFSKLKLNKVLLAGSNDLTVLPSELLFLPSIRTLYLDQ  | 142 |
| Query | 129 | NKLTLTETDVeilaslssleeldslslnsGIKALPFNYEKLVLNINLKRLNIKKTSLKGED | 188 |
|       |     | NKL L ETDVEILASL LEELDL+LNSGIKALP NYEKL +L LKRLNIKKTSLKGED    |     |
| Sbjct | 143 | NKLVLNETDVEILASLPGLEELDLNLSGIKALPSNYEKLKSLTRLKRLNIKKTSLKGED   | 202 |
| Query | 189 | ADKLQAILPNTKIDY 203                                           |     |
|       |     | ADKLQAILPNTKIDY                                               |     |
| Sbjct | 203 | ADKLQAILPNTKIDY 217                                           |     |

>WP\_100755326.1 leucine-rich repeat domain-containing protein [Leptospira kmetyi]  
PJZ30273.1 hypothetical protein CH378\_08580 [Leptospira kmetyi]  
Length=217

Score = 280 bits (715), Expect = 1e-92, Method: Compositional matrix adjust.  
Identities = 161/195 (83%), Positives = 172/195 (88%), Gaps = 0/195 (0%)

|       |     |                                                               |     |
|-------|-----|---------------------------------------------------------------|-----|
| Query | 9   | FDCKKNAEEILGEAKAKPELVQTLDFGMQKLSTVPEEVCGFNLTCLDLRLNSLTFLPEF   | 68  |
|       |     | DCKKNA E+L EAKAKPE VQTLG GMQKL+ VPE VC FPNLTCLDLRLNSLT LP+    |     |
| Sbjct | 23  | IDCKKNAGEVLEEAKAKPESVQTLDFGMQKLTAVPEGVCAFPNLTCLDLRLNSLTVLPDS  | 82  |
| Query | 69  | IGECKRLEQLNLFGNDLTTFPSTFSKLKLNKVLLAGNNDFTILPSELLFLPLIKILYVDR  | 128 |
|       |     | IGECK LEQLNLFGNDLT+ PS+FSKLKLNKVLLAG+ND T+LPSELLFLP IK LY+D+  |     |
| Sbjct | 83  | IGECKNLEQLNLFGNDLTSIPSSFSKLKLNKVLLAGSNDLTVLPSELLFLPSIKTLYLDQ  | 142 |
| Query | 129 | NKLTLTETDVeilaslssleeldslslnsGIKALPFNYEKLVLNINLKRLNIKKTSLKGED | 188 |

```

          NKL L ETDVEILASLS LEELDL+LNSGIK LP NYEKL +L LKRLNIKKTSLKGED
Sbjct  143 NKLALNETDVEILASLSGLEELDLNLNSGIKVLPSNYEKLKSLTRLKRLNIKKTSLKGED  202

Query  189 ADKLQAILPNTKIDY  203
          ADKLQAILPNTKIDY
Sbjct  203 ADKLQAILPNTKIDY  217

```

>WP\_135607718.1 leucine-rich repeat domain-containing protein [Leptospira kmetyi]  
 TGK19466.1 hypothetical protein EH062\_05620 [Leptospira kmetyi]  
 TGK32832.1 hypothetical protein EH066\_03605 [Leptospira kmetyi]  
 Length=217

Score = 279 bits (713), Expect = 3e-92, Method: Compositional matrix adjust.  
 Identities = 160/195 (82%), Positives = 172/195 (88%), Gaps = 0/195 (0%)

```

Query   9   FDCKKNAAEILGEAKAKPELVQTLDFGMQKLSTVPEEVCGFNLTCLDLRLNSLTFLPEF  68
          DCKKNA E+L EAKAKPE VQTLG GMQKL+ VPE VC FPNLTCLDLRLNSLT LP+
Sbjct  23   IDCKKNAGEVLEEAKAKPESVQTLDLGMQKLTAPEGVCAFPNLTCLDLRLNSLTVLPDS  82

Query   69   IGECKRLEQLNLFGNLDTTFPSTFSKLKLNKVLLAGNNDFTILPSELLFLPLIKILYVDR  128
          IGECK LEQLNLFGNLDT+ PS+FSKLKLNKVLLAG+ND T+LPSELLFLP I+ LY+D+
Sbjct  83   IGECKNLEQLNLFGNLDTSIPSSFSLKLNKVLLAGSNDLTVLPSELLFLPSIRTLYLDQ  142

Query   129  NKLTLTETDVeilaslsleeldlslnsGIKALPFNYEKLVLNLINKRLNIKKTSLKGED  188
          NKL L ETDVEILASLS LEELDL+LNSGIK LP NYEKL +L LKRLNIKKTSLKGED
Sbjct  143  NKLVLNETDVEILASLSGLEELDLNLNSGIKVLPSNYEKLKSLTRLKRLNIKKTSLKGED  202

Query   189  ADKLQAILPNTKIDY  203
          ADKLQAILPNTKIDY
Sbjct  203  ADKLQAILPNTKIDY  217

```

>WP\_020775386.1 leucine-rich repeat domain-containing protein [Leptospira alstonii]  
 EMJ90581.1 leucine rich repeat protein [Leptospira alstonii serovar Sichuan  
 str. 79601]  
 EQA82096.1 leucine rich repeat protein [Leptospira alstonii serovar Pingchang  
 str. 80-412]  
 Length=217

Score = 278 bits (712), Expect = 6e-92, Method: Compositional matrix adjust.  
 Identities = 163/195 (84%), Positives = 172/195 (88%), Gaps = 0/195 (0%)

```

Query   9   FDCKKNAAEILGEAKAKPELVQTLDFGMQKLSTVPEEVCGFNLTCLDLRLNSLTFLPEF  68
          DCKKNAAEIL EA KPE V+ LD GMQKLS+VP+ VCGFPNLT LDLRLNSLT LPEF
Sbjct  23   IDCKKNAAEILREANTKPESVRVLDLGMQKLSSVPDGVCGFPNLTNLDLRLNSLTSLPEF  82

Query   69   IGECKRLEQLNLFGNLDTTFPSTFSKLKLNKVLLAGNNDFTILPSELLFLPLIKILYVDR  128
          IGECK LEQLNLFGNLDT TFP++ SKLKLNKVLLAGNNDF LPSELLFLP IK LY+DR
Sbjct  83   IGECKNLEQLNLFGNLDTGTFPASISKLNKVLLAGNNDFAALPSELLFLPSIKTLYLDR  142

Query   129  NKLTLTETDVeilaslsleeldlslnsGIKALPFNYEKLVLNLINKRLNIKKTSLKGED  188
          NKLTLTETDVEILASLS LEELDL+LNS IKALP NY+KL NL LKRLNIKKTSLKGED
Sbjct  143  NKLTLTETDVEILASLSGLEELDLNLNSDIKALPSNYKKLNLTRKRLNIKKTSLKGED  202

```

Query 189 ADKLQAILPNTKIDY 203  
A+KLQAILPNTKIDY  
Sbjct 203 AEKLQAILPNTKIDY 217

>WP\_010574016.1 leucine-rich repeat domain-containing protein [Leptospira kmetyi]  
EQA55239.1 leucine rich repeat protein [Leptospira kmetyi serovar Malaysia  
str. Bejo-Iso9]  
Length=217

Score = 278 bits (711), Expect = 6e-92, Method: Compositional matrix adjust.  
Identities = 160/195 (82%), Positives = 172/195 (88%), Gaps = 0/195 (0%)

Query 9 FDCKKNAEEILGEAKAKPELVQTLDFGMQKLSTVPEEVCGFNLT KD LRLNSLTFLPEF 68  
DCKKNA E+L EAKAKPE VQ LD GMQKL+ VPE VC FPNLT+LDLRLNSLT LP+  
Sbjct 23 IDCKKNAGEVLEEAKAKPESVQNLDLGMQKLTA VPEGVCAFPNLTQLDLRLNSLT VLPDS 82

Query 69 IGECKRLEQLNLF GNDLTTFPSTFSKLK NLKVLLAGNNDFTILPSELLFLPLIKILYVDR 128  
IGECK LEQLNLF GNDLT+ PS+FSKLK NLKVLLAG+ND T+LPSELLFLP IK LY+D+  
Sbjct 83 IGECKNLEQLNLF GNDLTSIPSSFSKLK NLKVLLAGSNDLTVLPSELLFLPSIKTLYLDQ 142

Query 129 NKLT LTETDVeilas lssleeldlslns GIKALPFNYEKL VNLINL KRLNIKKTSLKGED 188  
NKL L ETDVEILASLS LEELDL+LNSGIKALP NYEKL +L LKRLNIKKTSLKGED  
Sbjct 143 NKLV LNETDVEILASLSGLEELDLNLNSGIKALPSNYEKLKSLTRLKRLNIKKTSLKGED 202

Query 189 ADKLQAILPNTKIDY 203  
ADKLQAILPNTKIDY  
Sbjct 203 ADKLQAILPNTKIDY 217

>WP\_135653950.1 leucine-rich repeat domain-containing protein [Leptospira kmetyi]  
TGL70325.1 hypothetical protein EHQ67\_05935 [Leptospira kmetyi]  
Length=217

Score = 278 bits (711), Expect = 7e-92, Method: Compositional matrix adjust.  
Identities = 159/195 (82%), Positives = 171/195 (88%), Gaps = 0/195 (0%)

Query 9 FDCKKNAEEILGEAKAKPELVQTLDFGMQKLSTVPEEVCGFNLT KD LRLNSLTFLPEF 68  
DCKKNA E+L EAKAKPE VQTL D GMQKL+ VPE VC FPNLT KD LRLNSLT LP+  
Sbjct 23 IDCKKNAGEVLEEAKAKPESVQTL D LGMQKLTA VPEGVCAFPNLT KD LRLNSLT VLPDS 82

Query 69 IGECKRLEQLNLF GNDLTTFPSTFSKLK NLKVLLAGNNDFTILPSELLFLPLIKILYVDR 128  
IGECK LEQLNLF GNDLT+ PS+FSKLK NLKVLLAG+ND T+LPSELLFLP I+ LY+D+  
Sbjct 83 IGECKNLEQLNLF GNDLTSIPSSFSKLK NLKVLLAGSNDLTVLPSELLFLPSIRTLYLDQ 142

Query 129 NKLT LTETDVeilas lssleeldlslns GIKALPFNYEKL VNLINL KRLNIKKTSLKGED 188  
NKL L ETDVEILASL LEELDL+LNSGIKALP NYEKL +L LKRLNIKKTSLKGED  
Sbjct 143 NKLV LNETDVEILASLPGLEELDLNLNSGIKALPSNYEKLKSLTRLKRLNIKKTSLKGED 202

Query 189 ADKLQAILPNTKIDY 203  
ADKLQ ILPNTKIDY  
Sbjct 203 ADKLQ TILPNTKIDY 217

>WP\_100738364.1 leucine-rich repeat domain-containing protein [Leptospira kmetyi]

PJZ40049.1 hypothetical protein CH370\_17970 [Leptospira kmetyi]  
Length=217

Score = 278 bits (711), Expect = 7e-92, Method: Compositional matrix adjust.  
Identities = 159/195 (82%), Positives = 171/195 (88%), Gaps = 0/195 (0%)

```
Query   9      FDCKKNAEEILGEAKAKPELVQTLDFGMQKLSTVPEEVCGFNLTCLDLRLNSLTFLPEF  68
          DCKKNA E+L EAKAKPE VQTLG GMQKL+ VPE VC FPNLTCLDLRLNSLT LP+
Sbjct   23      IDCKKNAGEVLEEAKAKPESVQTLGGMQKLTA VPEGVCAFPNLTCLDLRLNSLT VLPDS  82

Query   69      IGECKRLEQLNLF GNDLTTFPSTFSKLKLNKVLLAGNNDFTILPSELLFLPLIKILYVDR  128
          IGECK LEQLNLF GNDLT+ PS+FSKLKLNKVLLAG+ND T+LPSELLFLP I+ LY+D+
Sbjct   83      IGECKNLEQLNLF GNDLTSIPSSFSKLKLNKVLLAGSNDLTVLPSELLFLPSIRTLYLDQ  142

Query   129     NKLTLTETDVeilaslsleeldlslnsGIKALPFNYEKLVLNINLKRLNIKKTSKLGED  188
          NKL L ETDVEILASL LEELDL+LNSGIK LP NYEKL +L LKRLNIKKTSKLGED
Sbjct   143     NKLVLNETDVEILASLPGLEELDLNLSGIKVLPSNYEKLKSLTRLKRLNIKKTSKLGED  202

Query   189     ADKLQAILPNTKIDY  203
          ADKLQAILPNTKIDY
Sbjct   203     ADKLQAILPNTKIDY  217
```

>MBW0432169.1 hypothetical protein [Leptospira yasudae]  
Length=217

Score = 277 bits (709), Expect = 1e-91, Method: Compositional matrix adjust.  
Identities = 158/193 (82%), Positives = 174/193 (90%), Gaps = 0/193 (0%)

```
Query   11      CKKNAEEILGEAKAKPELVQTLDFGMQKLSTVPEEVCGFNLTCLDLRLNSLTFLPEFIG  70
          CKKN+ EIL EAKAKPE VQ LD GMQKLS++P+ VC FPNLT+LDLRLNSLT LP+FIG
Sbjct   25      CKKNSAEILEEAKAKPESVQILDGGMQKLSSIPDGVCAPNLTCLDLRLNSLTALPDFIG  84

Query   71      ECKRLEQLNLF GNDLTTFPSTFSKLKLNKVLLAGNNDFTILPSELLFLPLIKILYVDRNK  130
          +C +LEQLN+FGNDL FPS+FSKLKLNKVLLAG+ND TILPSELLFLPLIK LYVD+NK
Sbjct   85      DCTKLEQLNVFGNDLNAFPSSFSKLKLNKVLLAGSNDLTVLPSELLFLPLIKTLYVDQNK  144

Query   131     LTLTETDVeilaslsleeldlslnsGIKALPFNYEKLVLNINLKRLNIKKTSKLGEDAD  190
          LTLTETDVEILASLS+LEELDL+LNS I ALP NY+KL +L LKRLNIKKTSKLGEDAD
Sbjct   145     LTLTETDVEILASLSALEELDLNLSKIAALPSNYQKLKSLTRLKRLNIKKTSKLGEDAD  204

Query   191     KLQAILPNTKIDY  203
          KLQAILPNTKIDY
Sbjct   205     KLQAILPNTKIDY  217
```

>TGN02502.1 hypothetical protein EHR10\_00815 [Leptospira yasudae]  
Length=217

Score = 277 bits (709), Expect = 2e-91, Method: Compositional matrix adjust.  
Identities = 158/193 (82%), Positives = 174/193 (90%), Gaps = 0/193 (0%)

```
Query   11      CKKNAEEILGEAKAKPELVQTLDFGMQKLSTVPEEVCGFNLTCLDLRLNSLTFLPEFIG  70
          CKKN+ EIL EAKAKPE VQ LD GMQKLS++P+ VC FPNLT+LDLRLNSLT LP+FIG
Sbjct   25      CKKNSAEILEEAKAKPESVQILDGGMQKLSSIPDGVCAPNLTCLDLRLNSLTALPDFIG  84
```

|       |     |                                                              |     |
|-------|-----|--------------------------------------------------------------|-----|
| Query | 71  | ECKRLEQLNLFGNDLTTFPSTFSKLKNLKVLLAGNNDFTILPSELLFLPLIKILYVDRNK | 130 |
|       |     | +C +LEQLN+FGNDL FPS+FSKLKNLKVLLAG+ND TILPSELLFLPLIK LYVD+NK  |     |
| Sbjct | 85  | DCTKLEQLNVFGNDLNAFPSSFSKLKNLKVLLAGSNDLTILPSELLFLPLIKTLYVDQNK | 144 |
|       |     |                                                              |     |
| Query | 131 | LTLTETDVeilaslsleeldlslnsGIKALPFNYEKLVLNLINLKRNIKKTSLKGEDAD  | 190 |
|       |     | LTLTETDVEILASLS+LEELDL+LNS I ALP NY+KL +L LKRLNIKKTSLKGEDAD  |     |
| Sbjct | 145 | LTLTETDVEILASLSALEELDLNLNSKIAALPSNYQKLKSLTRLKRLNIKKTSLKGEDAD | 204 |
|       |     |                                                              |     |
| Query | 191 | KLQAILPNTKIDY                                                | 203 |
|       |     | KLQAILPNTKIDY                                                |     |
| Sbjct | 205 | KLQAILPNTKIDY                                                | 217 |

>WP\_118964127.1 hypothetical protein [Leptospira yasudae]  
 RHX95586.1 hypothetical protein DLM76\_00905 [Leptospira yasudae]  
 Length=217

Score = 276 bits (707), Expect = 2e-91, Method: Compositional matrix adjust.  
 Identities = 159/193 (82%), Positives = 174/193 (90%), Gaps = 0/193 (0%)

|       |     |                                                                |     |
|-------|-----|----------------------------------------------------------------|-----|
| Query | 11  | CKKNAEEILGEAKAKPELVQTLDFGMQKLSTVPEEVC GFPNLTKDLRLNSLTFLPEFIG   | 70  |
|       |     | CKKNA EIL EAKAKPE VQ LD GMQKLS++P+ VC FPNLT+LDLRLNSLT LP+FIG   |     |
| Sbjct | 25  | CKKNAEEILEEAKAKPESVQILD LGMQKLSSIPDGVC AFPNLTRLDLRLNSLTTLPDFIG | 84  |
|       |     |                                                                |     |
| Query | 71  | ECKRLEQLNLFGNDLTTFPSTFSKLKNLKVLLAGNNDFTILPSELLFLPLIKILYVDRNK   | 130 |
|       |     | +C +LEQLN+FGNDL FPS+FSKLKNLKVLLAG+ND TILPSELLFLPLIK LYVD+NK    |     |
| Sbjct | 85  | DCTKLEQLNVFGNDLNAFPSSFSKLKNLKVLLAGSNDLTILPSELLFLPLIKTLYVDQNK   | 144 |
|       |     |                                                                |     |
| Query | 131 | LTLTETDVeilaslsleeldlslnsGIKALPFNYEKLVLNLINLKRNIKKTSLKGEDAD    | 190 |
|       |     | LTLTETDVEILASLS+LEELDL+LNS I ALP NY+KL +L LKRLNIKKTSLKGEDAD    |     |
| Sbjct | 145 | LTLTETDVEILASLSALEELDLNLNSKITALPSNYQKLKSLTRLKRLNIKKTSLKGEDAD   | 204 |
|       |     |                                                                |     |
| Query | 191 | KLQAILPNTKIDY                                                  | 203 |
|       |     | KLQAILPNTKIDY                                                  |     |
| Sbjct | 205 | KLQAILPNTKIDY                                                  | 217 |

>WP\_061249228.1 leucine-rich repeat domain-containing protein [Leptospira alstonii]  
 Length=217

Score = 276 bits (707), Expect = 3e-91, Method: Compositional matrix adjust.  
 Identities = 162/195 (83%), Positives = 172/195 (88%), Gaps = 0/195 (0%)

|       |     |                                                               |     |
|-------|-----|---------------------------------------------------------------|-----|
| Query | 9   | FDCKKNAEEILGEAKAKPELVQTLDFGMQKLSTVPEEVC GFPNLTKDLRLNSLTFLPEF  | 68  |
|       |     | DCKKNAEEIL EA KPE V+ LD GMQKLS+VP+ VCGFPNLT LDLRLNSLT LPEF    |     |
| Sbjct | 23  | IDCKKNAEEILREANTKPESVRVLD LGMQKLSSVPDGVCGFPNLTNLDLRLNSLTSLPEF | 82  |
|       |     |                                                               |     |
| Query | 69  | IGECKRLEQLNLFGNDLTTFPSTFSKLKNLKVLLAGNNDFTILPSELLFLPLIKILYVDR  | 128 |
|       |     | IGECK LEQLNLFGNDL TFP++ SKLKNLKVLLAGNNDF LPSELLFLP IK LY+DR   |     |
| Sbjct | 83  | IGECKNLEQLNLFGNDLGTFPASISKLKNLKVLLAGNNDFAALPSELLFLPSIKTLYLDR  | 142 |
|       |     |                                                               |     |
| Query | 129 | NKLTLTETDVeilaslsleeldlslnsGIKALPFNYEKLVLNLINLKRNIKKTSLKGED   | 188 |
|       |     | NKLTLTETDVEILASLS LEELDL+LNS IKALP NY+KL NL LK+LNIKKTSLKGED   |     |
| Sbjct | 143 | NKLTLTETDVEILASLSGLEELDLNLNSDIKALPSNYKKLKNLTRLKKLNIKKTSLKGED  | 202 |

Query 189 ADKLQAILPNTKIDY 203  
A+KLQAILPNTKIDY  
Sbjct 203 AEKLQAILPNTKIDY 217

>EMY77189.1 leucine rich repeat protein [Leptospira weilii serovar Ranarum  
str. ICFT]  
Length=241

Score = 277 bits (708), Expect = 4e-91, Method: Compositional matrix adjust.  
Identities = 160/205 (78%), Positives = 178/205 (87%), Gaps = 2/205 (1%)

Query 1 GFVCFTASF--DCKKNAEEILGEAKAKPELVQTLDFGMQKLSTVPPEEVC GFPNLTKDLR 58  
G++ F + F DCKK AEEILGEAKA P V LD GMQKLS++PE +C FPNLT KDLR  
Sbjct 37 GWLFFASIFWIDCKKTAEEILGEAKASPSSVLLLDLGMQKLSSIPEGICSFPNLTKDLR 96

Query 59 LNSLTFLPEFIGECKRLEQLNLF GNDLTTFPSTFSKLKNLKVLLAGNNDFTILPSELLFL 118  
LNSLT LPE +GECK LEQLNLF GNDLTTFP++FSKLKNLKVLLAGNND T+LPSELLFL  
Sbjct 97 LNSLTSLPESVGECKNLEQLNLF GNDLTTFPASFSKLKNLKVLLAGNNDLTVLPSELLFL 156

Query 119 PLIKILYVDRNKLTLTETDVeilaslsleeIdlslnsGIKALPFNYEKL VNLINLKRLN 178  
P IK LY+D+NK+TLTETDVEILASLS LEELDL+LN+GIK LP NY KL +L LK+LN  
Sbjct 157 PRIKTLYLDQNKITLTETDVEILASLSELEELDLNLNTGIKTLPSNYGKLKSLARLKKLN 216

Query 179 IKKTSLKGEDADKLQAILPNTKIDY 203  
IKKTSLKGEDA+KLQAILPNTKIDY  
Sbjct 217 IKKTSLKGEDAEKLQAILPNTKIDY 241

>WP\_238730679.1 hypothetical protein [Leptospira sanjuanensis]  
MCG6194236.1 hypothetical protein [Leptospira sanjuanensis]  
Length=217

Score = 276 bits (706), Expect = 4e-91, Method: Compositional matrix adjust.  
Identities = 158/193 (82%), Positives = 173/193 (90%), Gaps = 0/193 (0%)

Query 11 CKKNAEEILGEAKAKPELVQTLDFGMQKLSTVPPEEVC GFPNLTKDLRLNSLTFLPEFIG 70  
CKKNA EIL EAKAKPE VQ LD GMQKLS +PE VC +PNLT+LDLRLNSLT LP+FIG  
Sbjct 25 CKKNAEEILEEAKAKPESVQILD LGMQKLSAIEPEGVCAYPNLTRLDLRLNSLTLPDFIG 84

Query 71 ECKRLEQLNLF GNDLTTFPSTFSKLKNLKVLLAGNNDFTILPSELLFLPLIKILYVDRNK 130  
+C +LEQLN+FGNDL+ FPS+FSKLKNLKVLLAG+ND TILPSELLFLPLIK LYVD+NK  
Sbjct 85 DCTKLEQLNVFGNDLSGFPSSFSKLKNLKVLLAGSNDLTILPSELLFLPLIKTLYVDQNK 144

Query 131 LTLTETDVeilaslsleeIdlslnsGIKALPFNYEKL VNLINLKRLNIKKTSLKGEDAD 190  
LTLTETDVEILASLS LEELDL+LNS I ALP NY+KL +L LKRLNIKKTSLKGEDA+  
Sbjct 145 LTLTETDVEILASLSVLEELDLNLSKITALPSNYQKLKSLTRLKRLNIKKTSLKGEDAE 204

Query 191 KLQAILPNTKIDY 203  
KLQAILPNTKIDY  
Sbjct 205 KLQAILPNTKIDY 217

>WP\_238747060.1 hypothetical protein [Leptospira sanjuanensis]

MCG6168822.1 hypothetical protein [Leptospira sanjuanensis]  
Length=217

Score = 276 bits (705), Expect = 6e-91, Method: Compositional matrix adjust.  
Identities = 158/193 (82%), Positives = 173/193 (90%), Gaps = 0/193 (0%)

```
Query 11  CKKNAEEILGEAKAKPELVQTLDFGMQKLSTVPEEVC GFPNLT KDLRLNSLTFLPEFIG 70
          CKKNA EIL EAKAKPE VQ LD GMQKLS +PE VC +PNLT+LDLRLNSLT LP+FIG
Sbjct 25  CKKNAEEILEEAKAKPESVQILD LGMQKLSAIPEGVCAYPNLTRLDLRLNSLTTLPDFIG 84

Query 71  ECKRLEQLNLF GNDLTTFPSTFSKLKLNKVLLAGNNDFTILPSELLFLPLIKILYVDRNK 130
          +C +LEQLN+FGNDL+ FPS+FSKLKLNKVLLAG+ND TILPSELLFLPLIK LYVD+NK
Sbjct 85  DCTKLEQLNVFGNDLSGFPSSFSKLKLNKVLLAGSNDLTILPSELLFLPLIKTLYVDQNK 144

Query 131 LTLTETDVeilaslssleeldslnsGIKALPFNYEKLVLNINLKRLNIKKTSLKGEDAD 190
          LTLTETDVEILASLS LEELDL+LNS I ALP NY+KL +L LKRLNIKKTSLKGEDA+
Sbjct 145 LTLTETDVEILASLSVLEELDLNLSKITALPSNYQKLKSLTRLKRLNIKKTSLKGEDAE 204

Query 191 KLQAILPNTKIDY 203
          KLQAILPNTKIDY
Sbjct 205 KLQAILPNTKIDY 217
```

>WP\_135574399.1 hypothetical protein [Leptospira yasudae]  
TGL76867.1 hypothetical protein EH077\_17875 [Leptospira yasudae]  
TGL79657.1 hypothetical protein EH072\_08705 [Leptospira yasudae]  
TGL83601.1 hypothetical protein EH083\_12525 [Leptospira yasudae]  
Length=217

Score = 275 bits (704), Expect = 9e-91, Method: Compositional matrix adjust.  
Identities = 161/202 (80%), Positives = 176/202 (87%), Gaps = 1/202 (0%)

```
Query 2  FVCFTASFDCKKNAEEILGEAKAKPELVQTLDFGMQKLSTVPEEVC GFPNLT KDLRLNS 61
          V F A CKKNA EIL EAKAKPE VQ LD GMQKLS++P+ VC FPNLT+LDLRLNS
Sbjct 17  LVSFLA-VACKKNAEEILEEAKAKPESVQILD LGMQKLSSIPDGVCAPNLT RLDLRLNS 75

Query 62  LTFLPEFIGECKRLEQLNLF GNDLTTFPSTFSKLKLNKVLLAGNNDFTILPSELLFLPLI 121
          LT LP+FIG+C +LEQLN+FGNDL FPS+FSKLKLN VLLAG+ND TILPSELLFLPLI
Sbjct 76  LTTLPDFIGDCTKLEQLNVFGNDLNAFPSSFSKLKLNVLVLAGSNDLTILPSELLFLPLI 135

Query 122 KILYVDRNKLTLTETDVeilaslssleeldslnsGIKALPFNYEKLVLNINLKRLNIKK 181
          K LYVD+NKLTLTETDVEILASLS+LEELDL+LNS I ALP NY+KL +L LKRLNIKK
Sbjct 136 KTLYVDQNKLTLTETDVEILASLSALEELDLNLSKIAALPSNYQKLKSLTRLKRLNIKK 195

Query 182 TSLKGEDADKLQAILPNTKIDY 203
          TSLKGEDADKLQAILPNTKIDY
Sbjct 196 TSLKGEDADKLQAILPNTKIDY 217
```

>WP\_135581985.1 hypothetical protein [Leptospira yasudae]  
TGK27116.1 hypothetical protein EH005\_09670 [Leptospira yasudae]  
TGM08091.1 hypothetical protein EH086\_03500 [Leptospira yasudae]  
Length=217

Score = 273 bits (698), Expect = 7e-90, Method: Compositional matrix adjust.

Identities = 157/193 (81%), Positives = 172/193 (89%), Gaps = 0/193 (0%)

```
Query 11  CKKNAEEILGEAKAKPELVQTLDFGMQKLSTVPEEVC GFPNLTKDLRLNSLTFLPEFIG 70
          CKKNA EIL EAKAK E VQ LD GMQKLS++P+ VC FPNLT+LDLRLNSLT LP+FIG
Sbjct 25  CKKNAEEILEEAKAKSESVQILD LGMQKLSSIPDGVCAFPNLTRDLRLNSLTALPDFIG 84

Query 71  ECKRLEQLNLF GNDLTTFPSTFSKLK NLKVLLAGNNDFTILPSELLFLPLIKILYVDRNK 130
          +C +LEQLN+FGNDL FPS+FSKLK NLKVLLAG+ND TILPSELLFLPLIK LYVD+NK
Sbjct 85  DCTKLEQLNVFGNDLNAFPSSFSKLK NLKVLLAGSNDLTILPSELLFLPLIKTLYVDQNK 144

Query 131 LTLTETDVeilaslsleeldlslnsGIKALPFNYEKLVLNLINLKRNLNIKKTSLKGEDAD 190
          LTLTETDVEILASL +LEELD L+LNS I ALP NY+KL +L LKRLNIKKTSLKGEDAD
Sbjct 145 LTLTETDVEILASLPAL EELD LNLNSKITALPSNYQKLKSLTRLKRNLNIKKTSLKGEDAD 204

Query 191 KLQAILPNTKIDY 203
          KLQAILPNTKIDY
Sbjct 205 KLQAILPNTKIDY 217
```

>WP\_118956310.1 hypothetical protein [Leptospira yasudae]  
RHX79626.1 hypothetical protein DLM77\_12155 [Leptospira yasudae]  
Length=217

Score = 271 bits (694), Expect = 2e-89, Method: Compositional matrix adjust.  
Identities = 156/193 (81%), Positives = 171/193 (89%), Gaps = 0/193 (0%)

```
Query 11  CKKNAEEILGEAKAKPELVQTLDFGMQKLSTVPEEVC GFPNLTKDLRLNSLTFLPEFIG 70
          CKKNA EIL EAKAK E VQ LD GMQKLS++P+ VC FPNLT+LDLRLNSLT LP+FIG
Sbjct 25  CKKNAEEILEEAKAKSESVQILD LGMQKLSSIPDGVCAFPNLTRDLRLNSLTALPDFIG 84

Query 71  ECKRLEQLNLF GNDLTTFPSTFSKLK NLKVLLAGNNDFTILPSELLFLPLIKILYVDRNK 130
          +C +LEQLN+FGNDL FPS+FSKLK NLKVLLAG+ND TILPSELLFLPLIK LYVD+NK
Sbjct 85  DCTKLEQLNVFGNDLNAFPSSFSKLK NLKVLLAGSNDLTILPSELLFLPLIKTLYVDQNK 144

Query 131 LTLTETDVeilaslsleeldlslnsGIKALPFNYEKLVLNLINLKRNLNIKKTSLKGEDAD 190
          LTLTE DVEILASL +LEELD L+LNS I ALP NY+KL +L LKRLNIKKTSLKGEDAD
Sbjct 145 LTLTEADVEILASLPAL EELD LNLNSKITALPSNYQKLKSLTRLKRNLNIKKTSLKGEDAD 204

Query 191 KLQAILPNTKIDY 203
          KLQAILPNTKIDY
Sbjct 205 KLQAILPNTKIDY 217
```

>WP\_004767299.1 hypothetical protein [Leptospira kirschneri]  
EKR10488.1 leucine rich repeat protein [Leptospira kirschneri serovar Valbuzzi  
str. 200702274]  
Length=217

Score = 270 bits (689), Expect = 2e-88, Method: Compositional matrix adjust.  
Identities = 158/194 (81%), Positives = 170/194 (88%), Gaps = 0/194 (0%)

```
Query 10  DCKKNAEEILGEAKAKPELVQTLDFGMQKLSTVPEEVC GFPNLTKDLRLNSLTFLPEFI 69
          DCKKNA EIL EAK K E VQ LD GMQKL+++PE +C FPNLT+LDLRLNSL LP++I
Sbjct 24  DCKKNAVEILEEAKRKSESVQILD LGMQKLTSIPEGICSFPNLTQLDLRLNSLNSLPDWI 83
```



```

Query 70  GECKRLEQLNLF GNDLTTFPSTFSKLKNLKVLLAGNNDFTILPSELLFLPLIKILYVDRN 129
          G CK LEQ+NLFGNDL T PS+FSKLKNLKVLL GNNDF LPSELLFLPLIKILY+D+N
Sbjct 84  GTCKNLEQINLFGNDLATIPSSFSKLKNLKVLLVGNNDF AFLPSELLFLPLIKILYLDQN 143

Query 130 KLTLTETDVeilaslssleeldslslnsGIKALPFNYEKLVLNLINLKRNLNIKKTSLKGEDA 189
          KLTLTETDVEILASLSSLEELD+LNSGIK LP NY KL NL LKRLNIKKTSLKGEDA
Sbjct 144 KLTLTETDVEILASLSSLEELDNLNSGIKMLPSNYNKLKLNRLKRLNIKKTSLKGEDA 203

Query 190 DKLQAILPNTKIDY 203
          DKLQAILPNTKIDY
Sbjct 204 DKLQAILPNTKIDY 217

```

```

>WP_004759233.1 hypothetical protein [Leptospira kirschneri]
  EKP03838.1 leucine rich repeat protein [Leptospira kirschneri str. 2008720114]
  EMK16725.1 leucine rich repeat protein [Leptospira kirschneri serovar Bim
str. PUO 1247]
  EMN03438.1 leucine rich repeat protein [Leptospira kirschneri serovar Bim
str. 1051]
  EMN24755.1 leucine rich repeat protein [Leptospira kirschneri serovar Sokoine
str. RM1]
  EPG48343.1 leucine rich repeat protein [Leptospira kirschneri serovar Cynopteri
str. 3522 CT]
Length=217

```

Score = 270 bits (689), Expect = 2e-88, Method: Compositional matrix adjust.  
Identities = 158/194 (81%), Positives = 170/194 (88%), Gaps = 0/194 (0%)

```

Query 10  DCKKNAEEILGEAKAKPELVQTLDFGMQKLSTVP EECVGFPNLT KDLRLNSLTLFPEFI 69
          DCKKNA EIL EAK K E VQ LD GMQKL+++PE +C FPNLT+LDLRLNSL LP++I
Sbjct 24  DCKKNAVEILEEAKRKSESQVILD LGMQKLTSIPEGICSFPNLTQLDLRLNSLNSLPDWI 83

Query 70  GECKRLEQLNLF GNDLTTFPSTFSKLKNLKVLLAGNNDFTILPSELLFLPLIKILYVDRN 129
          G CK LEQ+NLFGNDL T PS+FSKLKNLKVLL GNNDF LPSELLFLPLIKILY+D+N
Sbjct 84  GTCKNLEQINLFGNDLATIPSSFSKLKNLKVLLVGNNDF AFLPSELLFLPLIKILYLDQN 143

Query 130 KLTLTETDVeilaslssleeldslslnsGIKALPFNYEKLVLNLINLKRNLNIKKTSLKGEDA 189
          KLTLTETDVEILASLSSLEELD+LNSGIK LP NY KL NL LKRLNIKKTSLKGEDA
Sbjct 144 KLTLTETDVEILASLSSLEELDNLNSGIKTLPSNYNKLKLNRLKRLNIKKTSLKGEDA 203

Query 190 DKLQAILPNTKIDY 203
          DKLQAILPNTKIDY
Sbjct 204 DKLQAILPNTKIDY 217

```

```

>WP_004750770.1 MULTISPECIES: hypothetical protein [Leptospira]
  EJ071711.1 leucine rich repeat protein [Leptospira kirschneri serovar Grippytyphosa
str. RM52]
  EK050626.1 leucine rich repeat protein [Leptospira kirschneri str. 200802841]
  EMK05056.1 leucine rich repeat protein [Leptospira kirschneri str. MMD1493]
  EMK06448.1 leucine rich repeat protein [Leptospira kirschneri]
  EM080710.1 leucine rich repeat protein [Leptospira kirschneri str. 200801774]
Length=217

```

Score = 269 bits (687), Expect = 3e-88, Method: Compositional matrix adjust.

Identities = 157/194 (81%), Positives = 170/194 (88%), Gaps = 0/194 (0%)

```
Query 10 DCKKNAEEILGEAKAKPELVQTLDFGMQKLSTVPPEVCGFPNLTKDLRLNSLTFLPEFI 69
          DCKKNA EIL EAK K E VQ LD GMQKL+++PE +C FPNLT+LDLRLNSL LP++I
Sbjct 24 DCKKNAVEILEEAKRKSESQILDGLMQKLTSIPEGICSFPNLTLQLDLRLNSLNSLPDWI 83

Query 70 GECKRLEQLNLFGNLTTFPSTFSKLKNLKVLLAGNNDFTILPSELLFLPLIKILYVDRN 129
          G CK LEQ+NLFGNDL T PS+FSKLKNLKVLL GNNDF LPSELLFLPLIKILY+D+N
Sbjct 84 GTCKNLEQINLFGNDLATIPSSFSLKLNKVLVGNNDFAFLPSELLFLPLIKILYLDQN 143

Query 130 KLTLTETDVeilaslssleeldslslnsGIKALPFNYEKLVLNLINLKRLNIKKTSLKGEDA 189
          KLTLTETDVEILASLSSLEELD+LNSGIK LP NY KL NL LKRLNIKKTS+GEDA
Sbjct 144 KLTLTETDVEILASLSSLEELDNLNSGIKTLPSNYNKLKLNRLKRLNIKKTSLRGEDA 203

Query 190 DKLQAILPNTKIDY 203
          DKLQAILPNTKIDY
Sbjct 204 DKLQAILPNTKIDY 217
```

>WP\_004779378.1 hypothetical protein [Leptospira kirschneri]  
EK060426.1 leucine rich repeat protein [Leptospira kirschneri str. H2]  
EMK25402.1 leucine rich repeat protein [Leptospira kirschneri serovar Bulgarica str. Nikolaevo]  
Length=217

Score = 269 bits (687), Expect = 3e-88, Method: Compositional matrix adjust.  
Identities = 157/194 (81%), Positives = 170/194 (88%), Gaps = 0/194 (0%)

```
Query 10 DCKKNAEEILGEAKAKPELVQTLDFGMQKLSTVPPEVCGFPNLTKDLRLNSLTFLPEFI 69
          DCKKNA EI+ EAK K E VQ LD GMQKL+++PE +C FPNLT+LDLRLNSL LP++I
Sbjct 24 DCKKNAVEIIIEAKRKSESQILDGLMQKLTSIPEGICSFPNLTLQLDLRLNSLNSLPDWI 83

Query 70 GECKRLEQLNLFGNLTTFPSTFSKLKNLKVLLAGNNDFTILPSELLFLPLIKILYVDRN 129
          G CK LEQ+NLFGNDL T PS+FSKLKNLKVLL GNNDF LPSELLFLPLIKILY+D+N
Sbjct 84 GTCKNLEQINLFGNDLATIPSSFSLKLNKVLVGNNDFAFLPSELLFLPLIKILYLDQN 143

Query 130 KLTLTETDVeilaslssleeldslslnsGIKALPFNYEKLVLNLINLKRLNIKKTSLKGEDA 189
          KLTLTETDVEILASLSSLEELD+LNSGIK LP NY KL NL LKRLNIKKTSLKGEDA
Sbjct 144 KLTLTETDVEILASLSSLEELDNLNSGIKTLPSNYNKLKLNRLKRLNIKKTSLKGEDA 203

Query 190 DKLQAILPNTKIDY 203
          DKLQAILPNTKIDY
Sbjct 204 DKLQAILPNTKIDY 217
```

>WP\_016752856.1 hypothetical protein [Leptospira kirschneri]  
Length=217

Score = 268 bits (686), Expect = 4e-88, Method: Compositional matrix adjust.  
Identities = 157/194 (81%), Positives = 170/194 (88%), Gaps = 0/194 (0%)

```
Query 10 DCKKNAEEILGEAKAKPELVQTLDFGMQKLSTVPPEVCGFPNLTKDLRLNSLTFLPEFI 69
          DCKKNA EI+ EAK K E VQ LD GMQKL+++PE +C FPNLT+LDLRLNSL LP++I
Sbjct 24 DCKKNAVEIIIEAKRKSESQILDGLMQKLTSIPEGICSFPNLTLQLDLRLNSLNSLPDWI 83
```

```

Query   70   GECKRLEQLNLF GNDLTTFPSTFSKLKNLKVLLAGNNDFTILPSELLFLPLIKILYVDRN   129
          G CK LEQ+NLFGNDL T PS+FSKLKNLKVLL GNNDF LPSELLFLPLIKILY+D+N
Sbjct   84   GTCKNLEQINLFGNDLATIPSSFSKLKNLKVLLVGNNDF AFLPSELLFLPLIKILYLDQN   143

Query   130  KLTLTETDVeilaslssleeldlslnsGIKALPFNYEKLVLNLINLKRLNIKKTSLKGEDA   189
          KLTLTETDVEILASLSSLEELD L+LNSGIK LP NY KL NL LKRLNIKKTSLKGEDA
Sbjct   144  KLTLTETDVEILASLSSLEELD LNLNSGIKTLPSNYNKLKLNRLKRLNIKKTSLKGEDA   203

Query   190  DKLQAILPNTKIDY   203
          DKLQAILPNTKIDY
Sbjct   204  DKLQAILPNTKIDY   217

```

>WP\_020778543.1 hypothetical protein [Leptospira kirschneri]  
 EMJ94579.1 leucine rich repeat protein [Leptospira kirschneri str. JB]  
 Length=217

Score = 268 bits (685), Expect = 7e-88, Method: Compositional matrix adjust.  
 Identities = 157/194 (81%), Positives = 170/194 (88%), Gaps = 0/194 (0%)

```

Query   10   DCKKNAEEILGEAKAKPELVQTLDFGMQKLSTVP EEVCGFPNLTKLDLRLNSLTFLPEFI   69
          DCKKNA EIL EAK K E VQ LD GMQKL+++PE +C FPNLT+LDLRLNSL LP++I
Sbjct   24   DCKKNAVEIIEEAKRKSESQILD LGMQKLTSIPEGICSFPNLTLQLDLRLNSLNSLPDWI   83

Query   70   GECKRLEQLNLF GNDLTTFPSTFSKLKNLKVLLAGNNDFTILPSELLFLPLIKILYVDRN   129
          G CK LEQ+NLFGNDL T PS+FSKLKNLKVLL GNNDF LPSELLFLPLIKILY+D+N
Sbjct   84   GTCKNLEQINLFGNDLATIPSSFSKLKNLKVLLVGNNDF AFLPSELLFLPLIKILYLDQN   143

Query   130  KLTLTETDVeilaslssleeldlslnsGIKALPFNYEKLVLNLINLKRLNIKKTSLKGEDA   189
          KLTLTETDVEIL+SLSSLEELD L+LNSGIK LP NY KL NL LKRLNIKKTSLKGEDA
Sbjct   144  KLTLTETDVEILSSSLSSLEELD LNLNSGIKTLPSNYNKLKLNRLKRLNIKKTSLKGEDA   203

Query   190  DKLQAILPNTKIDY   203
          DKLQAILPNTKIDY
Sbjct   204  DKLQAILPNTKIDY   217

```

>WP\_082292870.1 hypothetical protein [Leptospira kirschneri]  
 OOV43912.1 hypothetical protein B1J93\_06785 [Leptospira kirschneri serovar  
 Pomona]  
 Length=217

Score = 268 bits (684), Expect = 1e-87, Method: Compositional matrix adjust.  
 Identities = 156/194 (80%), Positives = 170/194 (88%), Gaps = 0/194 (0%)

```

Query   10   DCKKNAEEILGEAKAKPELVQTLDFGMQKLSTVP EEVCGFPNLTKLDLRLNSLTFLPEFI   69
          DCKKNA EI+ EAK K E VQ LD GMQKL+++PE +C FPNLT+LDLRLNSL LP++I
Sbjct   24   DCKKNAVEIIEEAKRKSESQILD LGMQKLTSIPEGICSFPNLTLQLDLRLNSLNSLPDWI   83

Query   70   GECKRLEQLNLF GNDLTTFPSTFSKLKNLKVLLAGNNDFTILPSELLFLPLIKILYVDRN   129
          G CK LEQ+NLFGNDL T PS+FSKLKNLKVLL GNNDF LPSELLFLPLIKILY+D+N
Sbjct   84   GTCKNLEQINLFGNDLATIPSSFSKLKNLKVLLVGNNDF AFLPSELLFLPLIKILYLDQN   143

Query   130  KLTLTETDVeilaslssleeldlslnsGIKALPFNYEKLVLNLINLKRLNIKKTSLKGEDA   189
          KLTLTETDVEIL+SLSSLEELD L+LNSGIK LP NY KL NL LKRLNIKKTSLKGEDA

```

Sbjct 144 KLTLTETDVEILSSSLEELDNLNSGIKTLPSNYNKLKLNRLKRLNIKKTSLKGEDA 203

Query 190 DKLQAILPNTKIDY 203  
DKLQAILPNTKIDY

Sbjct 204 DKLQAILPNTKIDY 217

>WP\_004768364.1 hypothetical protein [Leptospira kirschneri]  
EM067317.1 leucine rich repeat protein [Leptospira kirschneri str. 200803703]  
Length=217

Score = 267 bits (682), Expect = 2e-87, Method: Compositional matrix adjust.  
Identities = 156/194 (80%), Positives = 170/194 (88%), Gaps = 0/194 (0%)

Query 10 DCKKNAEEILGEAKAKPELVQTLDFGMQKLSTVPPEEVC GFPNLT KDLRLNSLTFLPEFI 69  
DCK+NA EI+ EAK K E VQ LD GMQKL+++PE +C FPNLT+LDLRLNSL LP++I

Sbjct 24 DCKENAVEIIEEAKRKSESVQILD LGMQKLTSIPEGICSFPNLT QDLRLNSLNSLPDWI 83

Query 70 GECKRLEQLNLF GNDLTTFPSTFSKLKNLKVLLAGNNDFTILPSELLFLPLIKILYVDRN 129  
G CK LEQ+NLF GNDL T PS+FSKLKNLKVLL GNNDF LPSELLFLPLIKILY+D+N

Sbjct 84 GTCKNLEQINLFGNDLATIPSSFSKLKNLKVLLVGNNDF AFLPSELLFLPLIKILYLDQN 143

Query 130 KLTLTETDVeilaslssleeldlslnsGIKALPFNYEKL VNLINLKRLNIKKTSLKGEDA 189  
KLTLTETDVEILASLSSLEELD L+LNSGIK LP NY KL NL LKRLNIKKTSLKGEDA

Sbjct 144 KLTLTETDVEILASLSSLEELDNLNSGIKTLPSNYNKLKLNRLKRLNIKKTSLKGEDA 203

Query 190 DKLQAILPNTKIDY 203  
DKLQAILPNTKIDY

Sbjct 204 DKLQAILPNTKIDY 217

>WP\_004760926.1 hypothetical protein [Leptospira kirschneri]  
EKQ84072.1 leucine rich repeat protein [Leptospira kirschneri serovar Grippotyphosa  
str. Moskva]  
O0V50381.1 hypothetical protein B1J94\_00195 [Leptospira kirschneri serovar  
Grippotyphosa]  
Length=217

Score = 266 bits (681), Expect = 2e-87, Method: Compositional matrix adjust.  
Identities = 157/194 (81%), Positives = 169/194 (87%), Gaps = 0/194 (0%)

Query 10 DCKKNAEEILGEAKAKPELVQTLDFGMQKLSTVPPEEVC GFPNLT KDLRLNSLTFLPEFI 69  
DCKKNA EIL EAK K E VQ LD GMQKL+++PE +C FPNLT+LDLRLNSL L ++I

Sbjct 24 DCKKNAVEIIEEAKRKSESVQILD LGMQKLTSIPEGICSFPNLT QDLRLNSLNSLTDWI 83

Query 70 GECKRLEQLNLF GNDLTTFPSTFSKLKNLKVLLAGNNDFTILPSELLFLPLIKILYVDRN 129  
G CK LEQ+NLF GNDL T PS+FSKLKNLKVLL GNNDF LPSELLFLPLIKILY+D+N

Sbjct 84 GTCKNLEQINLFGNDLATIPSSFSKLKNLKVLLVGNNDF AFLPSELLFLPLIKILYLDQN 143

Query 130 KLTLTETDVeilaslssleeldlslnsGIKALPFNYEKL VNLINLKRLNIKKTSLKGEDA 189  
KLTLTETDVEILASLSSLEELD L+LNSGIK LP NY KL NL LKRLNIKKTSLKGEDA

Sbjct 144 KLTLTETDVEILASLSSLEELDNLNSGIKTLPSNYNKLKLNRLKRLNIKKTSLKGEDA 203

Query 190 DKLQAILPNTKIDY 203  
DKLQAILPNTKIDY

Sbjct 204 DKLQAILPNTKIDY 217

>WP\_069608131.1 hypothetical protein [Leptospira tipperaryensis]  
AOP34913.1 hypothetical protein A0128\_14300 [Leptospira tipperaryensis]  
Length=217

Score = 261 bits (667), Expect = 4e-85, Method: Compositional matrix adjust.  
Identities = 151/193 (78%), Positives = 165/193 (85%), Gaps = 0/193 (0%)

|       |     |                                                              |     |
|-------|-----|--------------------------------------------------------------|-----|
| Query | 11  | CKKNAAEEILGEAKAKPELVQTLDFGMQKLSTVPEEVCGFNLT                  | 70  |
|       |     | CKKNAAEEIL EAKA P V LD GMQKL+ +PE CGFPNL +LDLRLNSL LP+ +G    |     |
| Sbjct | 25  | CKKNAAEEILNEAKANPASVTILDLMQKLTAIPEGACGFNLT                   | 84  |
|       |     | CKKNAAEEILNEAKANPASVTILDLMQKLTAIPEGACGFNLT                   |     |
| Query | 71  | ECKRLEQLNLFGNDLTTFPSTFSKLKLNKVLLAGNNDFTILPSELLFLPLIKILYVDRNK | 130 |
|       |     | ECK +EQLN+FGNDLTTFPS SKLKLNKVLLAGNND T LPSELLFLP IK +Y+D+NK  |     |
| Sbjct | 85  | ECKSVEQLNVFGNDLTTFPSELSKLKLNKVLLAGNNDLTNLPSELLFLPEIKTIYMDQNK | 144 |
|       |     | ECKSVEQLNVFGNDLTTFPSELSKLKLNKVLLAGNNDLTNLPSELLFLPEIKTIYMDQNK |     |
| Query | 131 | LTLTETDVeilaslsleeldslslnsGIKALPFNYEKLVLNINLKRLNIKKTSLKGEDAD | 190 |
|       |     | LTLTETDV+ILASLS+LEELDL+LNSGIK LP NY KL NL LKRLNIKKTSLKGEDA+  |     |
| Sbjct | 145 | LTLTETDVIDILASLSNLEELDLNLNSGIKLPANYTKLNLT                    | 204 |
|       |     | LTLTETDVIDILASLSNLEELDLNLNSGIKLPANYTKLNLT                    |     |
| Query | 191 | KLQAILPNTKIDY 203                                            |     |
|       |     | KLQAILP TKIDY                                                |     |
| Sbjct | 205 | KLQAILPKTKIDY 217                                            |     |
|       |     | KLQAILPKTKIDY                                                |     |

>WP\_205279762.1 hypothetical protein [Leptospira ainlahdjerensis]  
MBM9577638.1 hypothetical protein [Leptospira ainlahdjerensis]  
Length=217

Score = 261 bits (667), Expect = 4e-85, Method: Compositional matrix adjust.  
Identities = 150/193 (78%), Positives = 164/193 (85%), Gaps = 0/193 (0%)

|       |     |                                                              |     |
|-------|-----|--------------------------------------------------------------|-----|
| Query | 11  | CKKNAAEEILGEAKAKPELVQTLDFGMQKLSTVPEEVCGFNLT                  | 70  |
|       |     | CKKNAAEEIL EAKA P V LD GMQKL+ +PE CGFPNL +LDLRLNSL LP+ +G    |     |
| Sbjct | 25  | CKKNAAEEILNEAKANPASVTILDLMQKLTAIPEGACGFNLT                   | 84  |
|       |     | CKKNAAEEILNEAKANPASVTILDLMQKLTAIPEGACGFNLT                   |     |
| Query | 71  | ECKRLEQLNLFGNDLTTFPSTFSKLKLNKVLLAGNNDFTILPSELLFLPLIKILYVDRNK | 130 |
|       |     | ECK +EQLN+FGNDLTTFPS SKLKLNKVLLAGNND T LPSELLFLP IK +Y+D+NK  |     |
| Sbjct | 85  | ECKSVEQLNVFGNDLTTFPSALS                                      | 144 |
|       |     | ECKSVEQLNVFGNDLTTFPSALS                                      |     |
| Query | 131 | LTLTETDVeilaslsleeldslslnsGIKALPFNYEKLVLNINLKRLNIKKTSLKGEDAD | 190 |
|       |     | LTLTETDV+ILASLS+LEELDL+LN GIK LP NY KL NL LKRLNIKKTSLKGEDA+  |     |
| Sbjct | 145 | LTLTETDVIDILASLSNLEELDLNLNVGIKILPANYTKLNLT                   | 204 |
|       |     | LTLTETDVIDILASLSNLEELDLNLNVGIKILPANYTKLNLT                   |     |
| Query | 191 | KLQAILPNTKIDY 203                                            |     |
|       |     | KLQAILP TKIDY                                                |     |
| Sbjct | 205 | KLQAILPKTKIDY 217                                            |     |
|       |     | KLQAILPKTKIDY                                                |     |

>WP\_232371773.1 hypothetical protein [Leptospira ainazelensis]  
Length=199

Score = 258 bits (658), Expect = 5e-84, Method: Compositional matrix adjust.

Identities = 149/193 (77%), Positives = 166/193 (86%), Gaps = 0/193 (0%)

```
Query 11  CKKNAEEILGEAKAKPELVQTLDFGMQKLSTVPEEVC GFPNLTKDLRLNSLTFLPEFIG 70
          CKKN EEIL EA AK + V LD GMQKL+++P+ VC FPNL +LDLRLNSL LP+FIG
Sbjct 7   CKKNVEEILNEANAKADSVTILD LGMQKLTSIPDGVCKFPNLKRLDLRLNSLASLPDFIG 66

Query 71  ECKRLEQLNLF GNDLTTFPSTFSKLK NLKVLLAGNNDFTILPSELLFLPLIKILYVDRNK 130
          ECK +EQLN+FGNDLTTFPS SKLKNLKV LAGNND T LPSELLFLP IK +Y+D+NK
Sbjct 67  ECKSVEQLNVFGNDLTTFPSALS KLK NLKVFLAGNNDLTNLPSELLFLPEIKTIYMDQNK 126

Query 131  LTLTETDVeilaslssleeldslslnsGIKALPFNYEKLVLNLINLKRNLNIKKTSLKGEDAD 190
          LTLTETDV+ILASLS+LEELDL+LNSGIK+LP NY KL NL LKRLNIKKTSLKGEDA+
Sbjct 127  LTLTETDVIDILASLSNLEELDLNLNSGIKSLPSNYTKLKNLTRLKRLNIKKTSLKGEDAE 186

Query 191  KLQAILPNTKIDY 203
          KLQAILP TKIDY
Sbjct 187  KLQAILPKTKIDY 199
```

>MBM9502464.1 hypothetical protein [Leptospira ainazelensis]  
Length=217

Score = 258 bits (659), Expect = 6e-84, Method: Compositional matrix adjust.  
Identities = 149/193 (77%), Positives = 166/193 (86%), Gaps = 0/193 (0%)

```
Query 11  CKKNAEEILGEAKAKPELVQTLDFGMQKLSTVPEEVC GFPNLTKDLRLNSLTFLPEFIG 70
          CKKN EEIL EA AK + V LD GMQKL+++P+ VC FPNL +LDLRLNSL LP+FIG
Sbjct 25  CKKNVEEILNEANAKADSVTILD LGMQKLTSIPDGVCKFPNLKRLDLRLNSLASLPDFIG 84

Query 71  ECKRLEQLNLF GNDLTTFPSTFSKLK NLKVLLAGNNDFTILPSELLFLPLIKILYVDRNK 130
          ECK +EQLN+FGNDLTTFPS SKLKNLKV LAGNND T LPSELLFLP IK +Y+D+NK
Sbjct 85  ECKSVEQLNVFGNDLTTFPSALS KLK NLKVFLAGNNDLTNLPSELLFLPEIKTIYMDQNK 144

Query 131  LTLTETDVeilaslssleeldslslnsGIKALPFNYEKLVLNLINLKRNLNIKKTSLKGEDAD 190
          LTLTETDV+ILASLS+LEELDL+LNSGIK+LP NY KL NL LKRLNIKKTSLKGEDA+
Sbjct 145  LTLTETDVIDILASLSNLEELDLNLNSGIKSLPSNYTKLKNLTRLKRLNIKKTSLKGEDAE 204

Query 191  KLQAILPNTKIDY 203
          KLQAILP TKIDY
Sbjct 205  KLQAILPKTKIDY 217
```

>WP\_004443975.1 hypothetical protein [Leptospira noguchii]  
EM090500.1 leucine rich repeat protein [Leptospira noguchii str. 2001034031]  
Length=217

Score = 255 bits (652), Expect = 7e-83, Method: Compositional matrix adjust.  
Identities = 158/202 (78%), Positives = 174/202 (86%), Gaps = 0/202 (0%)

```
Query 2   FVCFTASFDCKKNAEEILGEAKAKPELVQTLDFGMQKLSTVPEEVC GFPNLTKDLRLNS 61
          F+          DCKKNA EIL EAK K E VQ LD GMQKL+++PE VC FPNLT+LDLRLNS
Sbjct 16  FLISIFWIDCKKNAIEILEEAKKKSESVQILD LGMQKLTSIPEGVCSFPNLQLDLRLNS 75

Query 62  LTFLPEFIGECKRLEQLNLF GNDLTTFPSTFSKLK NLKVLLAGNNDFTILPSELLFLPLI 121
          L+FLP++IG CK LEQ+NLF GNDLTT PS+FSKLK NLKVLL GNNDFT LPSELLFLPLI
```

|       |     |                                                                |     |
|-------|-----|----------------------------------------------------------------|-----|
| Sbjct | 76  | LSFLPDWIGTCKNLEQVNLFGNDLTTVPSSFSKLNKLVLLGNNDFTFLPSELLFLPLI     | 135 |
| Query | 122 | KILYVDRNKLTLTETDVeilaslssleeldslslnsGIKALPFNYEKLVLNLINLKRLNIKK | 181 |
|       |     | K LY+D+NKLTLTETD+EIL+SLS LEELDL+LN GIK LP NY KL NLI+LKRLNIKK   |     |
| Sbjct | 136 | KTLYLDQNKLTLTETDIEILSSLSGLEELDNLNPGIKILPSNYNKLKNLIHLKRLNIKK    | 195 |
| Query | 182 | TSLKGEDADKLQAILPNTKIDY                                         | 203 |
|       |     | T LKGEDADKLQAILPNTKIDY                                         |     |
| Sbjct | 196 | TLLKGEDADKLQAILPNTKIDY                                         | 217 |

>WP\_004449517.1 hypothetical protein [Leptospira noguchii]  
 EMI70452.1 leucine rich repeat protein [Leptospira noguchii str. Bonito]  
 TQE73030.1 hypothetical protein FF021\_12990 [Leptospira noguchii]  
 UOG31535.1 hypothetical protein MAL06\_05855 [Leptospira noguchii]  
 UOG35182.1 hypothetical protein MAL02\_05610 [Leptospira noguchii]  
 UOG46091.1 hypothetical protein MAL01\_05745 [Leptospira noguchii]  
 Length=217

Score = 254 bits (650), Expect = 1e-82, Method: Compositional matrix adjust.  
 Identities = 157/194 (81%), Positives = 172/194 (89%), Gaps = 0/194 (0%)

|       |     |                                                                |     |
|-------|-----|----------------------------------------------------------------|-----|
| Query | 10  | DCKKNAEEILGEAKAKPELVQTLDFGMQKLSTVPEEVC GFPNLTKLDLRLNSLTFLEPFI  | 69  |
|       |     | DCKKNA EIL EAK K E VQ LD GMQKL+++PE VC FPNLT+LDLRLNSL+FLP++I   |     |
| Sbjct | 24  | DCKKNAVEILEEAKKSESQVILDLGMQKLTSIPEGVCSFPNLTKLDLRLNSLSFLPDWI    | 83  |
| Query | 70  | GECKRLEQLNLF GNDLTTFPSTFSKLNKLVLLAGNNDFTILPSELLFLPLIKILYVDRN   | 129 |
|       |     | G CK LEQ+NLFGNDLTT PS+FSKLNKLVLL GNNDFT LPSELLFLPLIK LY+D+N    |     |
| Sbjct | 84  | GTCKNLEQVNLFGNDLTTVPSSFSKLNKLVLLGNNDFTFLPSELLFLPLIKTLYLDQN     | 143 |
| Query | 130 | KLTLTETDVeilaslssleeldslslnsGIKALPFNYEKLVLNLINLKRLNIKKTSLKGEDA | 189 |
|       |     | KLTLTETD+EIL+SLS LEELDL+LNSGIK LP NY KL NL +LKRLNIKKT LKGEDA   |     |
| Sbjct | 144 | KLTLTETDIEILSSLSGLEELDNLNLSGIKMLPSNYNKLKNLTHLKRLNIKKTLKGEDA    | 203 |
| Query | 190 | DKLQAILPNTKIDY                                                 | 203 |
|       |     | DKLQAILPNTKIDY                                                 |     |
| Sbjct | 204 | DKLQAILPNTKIDY                                                 | 217 |

>WP\_004422093.1 hypothetical protein [Leptospira noguchii]  
 EKR73675.1 leucine rich repeat protein [Leptospira noguchii str. 2006001870]  
 UOG49773.1 hypothetical protein MAL00\_05865 [Leptospira noguchii]  
 Length=217

Score = 254 bits (650), Expect = 2e-82, Method: Compositional matrix adjust.  
 Identities = 157/194 (81%), Positives = 172/194 (89%), Gaps = 0/194 (0%)

|       |    |                                                               |     |
|-------|----|---------------------------------------------------------------|-----|
| Query | 10 | DCKKNAEEILGEAKAKPELVQTLDFGMQKLSTVPEEVC GFPNLTKLDLRLNSLTFLEPFI | 69  |
|       |    | DCKKNA EIL EAK K E VQ LD GMQKL+++PE VC FPNLT+LDLRLNSL+FLP++I  |     |
| Sbjct | 24 | DCKKNAVEILEEAKKSESQVILDLGMQKLTSIPEGVCSFPNLTKLDLRLNSLSFLPDWI   | 83  |
| Query | 70 | GECKRLEQLNLF GNDLTTFPSTFSKLNKLVLLAGNNDFTILPSELLFLPLIKILYVDRN  | 129 |
|       |    | G CK LEQ+NLFGNDLTT PS+FSKLNKLVLL GNNDFT LPSELLFLPLIK LY+D+N   |     |
| Sbjct | 84 | GTCKNLEQVNLFGNDLTTVPSSFSKLNKLVLLGNNDFTFLPSELLFLPLIKTLYLDQN    | 143 |

```

Query 130 KLTLTETDVeilaslssleeldslslnsGIKALPFNYEKLVLNINLKRLNIKKTSKGEDA 189
          KLTLTETD+EIL+SLS LEELDL+LNSGIK LP NY KL NL +LKRLNIKKT LKGEDA
Sbjct 144 KLTLTETDIEILSSSLGLEELDNLNLSGIKILPSNYNKLKLNTHLKRLNIKKTLLKGEDA 203

Query 190 DKLQAILPNTKIDY 203
          DKLQAILPNTKIDY
Sbjct 204 DKLQAILPNTKIDY 217

```

>WP\_004455400.1 hypothetical protein [Leptospira noguchii]  
 EMS87372.1 leucine rich repeat protein [Leptospira noguchii str. Hook]  
 UOG61555.1 hypothetical protein MAL07\_06005 [Leptospira noguchii]  
 Length=217

Score = 254 bits (648), Expect = 2e-82, Method: Compositional matrix adjust.  
 Identities = 157/194 (81%), Positives = 172/194 (89%), Gaps = 0/194 (0%)

```

Query 10 DCKKNAEEILGEAKAKPELVQTLDFGMQKLSTVPPEEVC GFPNLT KLDLRLNSLTFLPEFI 69
          DCKKNA EIL EAK K E VQ LD GMQKL+++PE VC FPNLT+LDLRLNSL+FLP++I
Sbjct 24 DCKKNAIEILEEAKKKSESVQILD LGMQKLTSIPEGVCSFPNLTQLDLRLNSLSFLPDWI 83

Query 70 GECKRLEQLNLF GNDLTTFPSTFSKLKNLKVLLAGNNDFTILPSELLFLPLIKILYVDRN 129
          G CK LEQ+NLF GNDLTT PS+FSKLKNLKVLL GNNDFT LPSELLFLPLIK LY+D+N
Sbjct 84 GTCKNLEQVNLFGNDLTTVPSSFSKLKNLKVLLGNNDFTFLPSELLFLPLIKTLYLDQN 143

Query 130 KLTLTETDVeilaslssleeldslslnsGIKALPFNYEKLVLNINLKRLNIKKTSKGEDA 189
          KLTLTETD+EIL+SLS LEELDL+LNSGIK LP NY KL NL +LKRLNIKKT LKGEDA
Sbjct 144 KLTLTETDIEILSSSLGLEELDNLNLSGIKILPSNYNKLKLNTHLKRLNIKKTLLKGEDA 203

Query 190 DKLQAILPNTKIDY 203
          DKLQAILPNTKIDY
Sbjct 204 DKLQAILPNTKIDY 217

```

>WP\_243817925.1 hypothetical protein [Leptospira noguchii]  
 UOG36928.1 hypothetical protein MAL08\_12575 [Leptospira noguchii]  
 Length=217

Score = 254 bits (648), Expect = 3e-82, Method: Compositional matrix adjust.  
 Identities = 156/194 (80%), Positives = 171/194 (88%), Gaps = 0/194 (0%)

```

Query 10 DCKKNAEEILGEAKAKPELVQTLDFGMQKLSTVPPEEVC GFPNLT KLDLRLNSLTFLPEFI 69
          DCKKNA EIL EAK K E VQ LD GMQKL+++PE VC FPNLT+LDLRLNSL+FLP++I
Sbjct 24 DCKKNAVEILEEAKKKSESVQILD LGMQKLTSIPEGVCSFPNLTQLDLRLNSLSFLPDWI 83

Query 70 GECKRLEQLNLF GNDLTTFPSTFSKLKNLKVLLAGNNDFTILPSELLFLPLIKILYVDRN 129
          G CK LEQ+NLF GNDLTT PS+FSKLKNLKVLL GNNDFT LPSELLFLPLIK LY+D+N
Sbjct 84 GTCKNLEQVNLFGNDLTTVPSSFSKLKNLKVLLGNNDFTFLPSELLFLPLIKTLYLDQN 143

Query 130 KLTLTETDVeilaslssleeldslslnsGIKALPFNYEKLVLNINLKRLNIKKTSKGEDA 189
          KLTLTETD+EIL+SLS LEELDL+LN GIK LP NY KL NL +LKRLNIKKT LKGEDA
Sbjct 144 KLTLTETDIEILSSSLGLEELDNLNLP GIKMLPSNYNKLKLNTHLKRLNIKKTLLKGEDA 203

Query 190 DKLQAILPNTKIDY 203
          DKLQAILPNTKIDY

```



Sbjct 204 DKLQAILPNTKIDY 217

>WP\_053522720.1 hypothetical protein [Leptospira noguchii]  
Length=217

Score = 254 bits (648), Expect = 3e-82, Method: Compositional matrix adjust.  
Identities = 156/194 (80%), Positives = 172/194 (89%), Gaps = 0/194 (0%)

```
Query 10 DCKKNAEEILGEAKAKPELVQTLDFGMQKLSTVP EECVGFNLT KDLRLNSLTLPEFI 69
          DCKK+A EIL EAK K E VQ LD GMQKL+++PE VC FPNLT+LDLRLNSL+FLP++I
Sbjct 24 DCKKSAVEILEEAKKSESQILD LGMQKLTSIPEGVCSFPNLTQLDLRLNSLSFLPDWI 83

Query 70 GECKRLEQLNLF GNDLTTFPSTFSKLK NLKVLLAGNNDFTILPSELLFLPLIKILYVDRN 129
          G CK LEQ+N FGNDLTT PS+FSKLK NLKVLL GNNDFT LPSELLFLPLIKILY+D+N
Sbjct 84 GTCKNLEQVNF F GNDLTTVPSSFSKLK NLKVLLGNNDFTFLPSELLFLPLIKILYLDQN 143

Query 130 KLTLTETDVeilaslssleeldslslnsGIKALPFNYEKL VNLINLKR LNIKKTSLKGEDA 189
          KLTLTETD+EIL+SLS LEELDL+LNSGIK LP NY KL NL +LKRLNIKKT LKGEDA
Sbjct 144 KLTLTETDIEILSSLSGLEELDLNLNSGIKMLPSNYNKLK NLTHLKR LNIKKTLKGEDA 203

Query 190 DKLQAILPNTKIDY 203
          DKLQAILPNTKIDY
Sbjct 204 DKLQAILPNTKIDY 217
```

>WP\_004452014.1 hypothetical protein [Leptospira noguchii]  
EMS89273.1 leucine rich repeat protein [Leptospira noguchii str. Cascata]  
UOG57651.1 hypothetical protein MAL03\_05830 [Leptospira noguchii]  
Length=217

Score = 253 bits (647), Expect = 4e-82, Method: Compositional matrix adjust.  
Identities = 157/202 (78%), Positives = 173/202 (86%), Gaps = 0/202 (0%)

```
Query 2 FVCFTASFDCKKNAEEILGEAKAKPELVQTLDFGMQKLSTVP EECVGFNLT KDLRLNS 61
          F+ DCKKNA EIL EAK K E VQ LD GMQKL+++PE VC FPNLT+LDLRLNS
Sbjct 16 FLISIFWIDCKKNAVEILEEAKKSESQILD LGMQKLTSIPEGVCSFPNLTQLDLRLNS 75

Query 62 LTLPEFIGECKRLEQLNLF GNDLTTFPSTFSKLK NLKVLLAGNNDFTILPSELLFLPLI 121
          L+FLP++IG CK LEQ+NLFGNDLTT PS+FSKLK NLKVLL GNNDFT LPSELLFLPLI
Sbjct 76 LSFLPDWIGTCKNLEQVNLFGNDLTTVPSSFSKLK NLKVLLGNNDFTFLPSELLFLPLI 135

Query 122 KILYVDRNKLTLTETDVeilaslssleeldslslnsGIKALPFNYEKL VNLINLKR LNIKK 181
          K LY+D+NKLTLTETD+EIL+SLS LEELDL+LN GIK LP NY KL NL +LKRLNIKK
Sbjct 136 KTLYLDQNKLTLTETDIEILSSLSGLEELDLNLNPGIKILPSNYNKLK NLTHLKR LNIKK 195

Query 182 TSLKGEDADKLQAILPNTKIDY 203
          T LKGEDADKLQAILPNTKIDY
Sbjct 196 TLLKGEDADKLQAILPNTKIDY 217
```

>WP\_243827912.1 hypothetical protein [Leptospira noguchii]  
UOG42562.1 hypothetical protein MAL05\_05795 [Leptospira noguchii]  
Length=217

Score = 253 bits (646), Expect = 5e-82, Method: Compositional matrix adjust.  
Identities = 157/202 (78%), Positives = 173/202 (86%), Gaps = 0/202 (0%)

```
Query 2 FVCFTASFDCKKNAEEILGEAKAKPELVQTLDFGMQKLSTVPEEVCGFPNLTKDLRLNS 61
F+ DCKKNA EIL EAK K E VQ LD GMQKL+++PE VC FPNLT+LDLRLNS
Sbjct 16 FLISIFWIDCKKNAIEILEEAKKKSESQILDGLGMQKLTSIPEGVCSFPNLTQLDLRLNS 75

Query 62 LTFLPEFIGECKRLEQLNLFGNLDTTFPSTFSKLKLNKVLLAGNNDFTILPSELLFLPLI 121
L+FLP++IG CK LEQ+NLFGNDLTT PS+FSKLKLNKVLL GNNDFT LPSELLFLPLI
Sbjct 76 LSFLPDWIGTCKNLEQVNLFGNDLTTVPSSFSKLKLNKVLLGNNDFTFLPSELLFLPLI 135

Query 122 KILYVDRNKLTLTETDVeilaslsleeldslslnsGIKALPFNYEKLVLNINLKRLNIKK 181
K LY+D+NKLTLTETD+EIL+SLS LEELDL+LN GIK LP NY KL NL +LKRLNIKK
Sbjct 136 KTLYLDQNKLTLTETDIEILSSLSGLEELDLNLPGIKILPSNYNKLKLNTHLKRLNIKK 195

Query 182 TSLKGEDADKLQAILPNTKIDY 203
T LKGEDADKLQAILPNTKIDY
Sbjct 196 TLLKGEDADKLQAILPNTKIDY 217
```

>WP\_061233070.1 hypothetical protein [Leptospira noguchii]  
Length=217

Score = 253 bits (645), Expect = 8e-82, Method: Compositional matrix adjust.  
Identities = 157/202 (78%), Positives = 173/202 (86%), Gaps = 0/202 (0%)

```
Query 2 FVCFTASFDCKKNAEEILGEAKAKPELVQTLDFGMQKLSTVPEEVCGFPNLTKDLRLNS 61
F+ DCKK+A EIL EAK K E VQ LD GMQKL+++PE VC FPNLT+LDLRLNS
Sbjct 16 FLISIFWIDCKKSAIEILEEAKRKSESQILDGLGMQKLTSIPEGVCSFPNLTQLDLRLNS 75

Query 62 LTFLPEFIGECKRLEQLNLFGNLDTTFPSTFSKLKLNKVLLAGNNDFTILPSELLFLPLI 121
L FLP++IG CK LEQ+NLFGNDLTT PS+FSKLKLNKVLL GNNDFT LPSELLFLPLI
Sbjct 76 LNFLPDWIGTCKNLEQVNLFGNDLTTVPSSFSKLKLNKVLLGNNDFTFLPSELLFLPLI 135

Query 122 KILYVDRNKLTLTETDVeilaslsleeldslslnsGIKALPFNYEKLVLNINLKRLNIKK 181
KILY+D+NKLTLTETD+EIL+SLS LEELDL+LN GIK LP NY KL NL +LKRLNIKK
Sbjct 136 KILYLDQNKLTLTETDIEILSSLSGLEELDLNLPGIKILPSNYNKLKLNTHLKRLNIKK 195

Query 182 TSLKGEDADKLQAILPNTKIDY 203
T LKGEDADKLQAILPNTKIDY
Sbjct 196 TLLKGEDADKLQAILPNTKIDY 217
```

>WP\_017852233.1 hypothetical protein [Leptospira interrogans]  
Length=217

Score = 252 bits (643), Expect = 1e-81, Method: Compositional matrix adjust.  
Identities = 157/194 (81%), Positives = 171/194 (88%), Gaps = 0/194 (0%)

```
Query 10 DCKKNAEEILGEAKAKPELVQTLDFGMQKLSTVPEEVCGFPNLTKDLRLNSLTFLPEFI 69
DCKKNA EIL EAK K E +Q LD GMQKL+++PE VC FPNLT+LDLRLNSL LP +I
Sbjct 24 DCKKNAVEILEEAKRKSESIQILDGLGMQKLTSIPEGVCSFPNLTQLDLRLNSLNSLPGWI 83

Query 70 GECKRLEQLNLFGNLDTTFPSTFSKLKLNKVLLAGNNDFTILPSELLFLPLIKILYVDRN 129
G CK LEQ+NLFGNDL T PS+FSKLKLNKVLL GNNDFT LPSELLFLPLIK LY+D+N
```

|       |     |                                                                |     |
|-------|-----|----------------------------------------------------------------|-----|
| Sbjct | 84  | GACKNLEQINLFGNDLNTVPSSFSKLKNLKVLLLGNDFTFLPSELLFLPLIKTLYLDQN    | 143 |
| Query | 130 | KLTLTETDVeilaslssleeldslslnsGIKALPFNYEKLVLNLINLKRLNIKKTSLKGEDA | 189 |
|       |     | KLTLTETDVEILASLSSLEELD+LNSGIKALP NY KL NL +LKRLNIKKTSLKGEDA    |     |
| Sbjct | 144 | KLTLTETDVEILASLSSLEELDNLNSGIKALPSNYNKLKLNTHLKRLNIKKTSLKGEDA    | 203 |
| Query | 190 | DKLQAILPNTKIDY 203                                             |     |
|       |     | DKLQA+LPNT+IDY                                                 |     |
| Sbjct | 204 | DKLQAVLPNTRIDY 217                                             |     |

>WP\_061241709.1 hypothetical protein [Leptospira interrogans]  
Length=217

Score = 251 bits (641), Expect = 3e-81, Method: Compositional matrix adjust.  
Identities = 157/194 (81%), Positives = 170/194 (88%), Gaps = 0/194 (0%)

|       |     |                                                                |     |
|-------|-----|----------------------------------------------------------------|-----|
| Query | 10  | DCKKNAEEILGEAKAKPELVQTLDFGMQKLSTVPPEEVCGFPNLTKLDLRLNSLTFLPEFI  | 69  |
|       |     | DCKKNA EIL EAK K E +Q LD GMQKL+++PE VC FPNLT+LDLRLNSL LP +I    |     |
| Sbjct | 24  | DCKKNAVEILEEAKRKSESIQILDGGMQKLTSIPEGVCSFPNLTQLDLRLNSLNSLPGWI   | 83  |
| Query | 70  | GECKRLEQLNLFGNDLTTFPSTFSKLKNLKVLLAGNDFTILPSELLFLPLIKILYVDRN    | 129 |
|       |     | G CK LEQ+NLFGNDL T PS+FSKLKNLKVLL GNNDFT LPSELLFLPLIK LY+D+N   |     |
| Sbjct | 84  | GACKNLEQINLFGNDLNTVPSSFSKLKNLKVLLLGNDFTFLPSELLFLPLIKTLYLDQN    | 143 |
| Query | 130 | KLTLTETDVeilaslssleeldslslnsGIKALPFNYEKLVLNLINLKRLNIKKTSLKGEDA | 189 |
|       |     | KLTLTETDVEILASLSSLEELD+LNSGIK LP NY KL NL +LKRLNIKKTSLKGEDA    |     |
| Sbjct | 144 | KLTLTETDVEILASLSSLEELDNLNSGIKVLPSNYNKLKLNTHLKRLNIKKTSLKGEDA    | 203 |
| Query | 190 | DKLQAILPNTKIDY 203                                             |     |
|       |     | DKLQA+LPNTKIDY                                                 |     |
| Sbjct | 204 | DKLQAVLPNTKIDY 217                                             |     |

>WP\_001010180.1 hypothetical protein [Leptospira interrogans]  
EMJ57593.1 leucine rich repeat protein [Leptospira interrogans serovar Valbuzzi str. Duyster]  
EN074053.1 leucine rich repeat protein [Leptospira interrogans serovar Valbuzzi str. Valbuzzi]  
Length=217

Score = 251 bits (641), Expect = 3e-81, Method: Compositional matrix adjust.  
Identities = 157/194 (81%), Positives = 171/194 (88%), Gaps = 0/194 (0%)

|       |     |                                                                |     |
|-------|-----|----------------------------------------------------------------|-----|
| Query | 10  | DCKKNAEEILGEAKAKPELVQTLDFGMQKLSTVPPEEVCGFPNLTKLDLRLNSLTFLPEFI  | 69  |
|       |     | DCKKNA EIL EAK K E +Q LD GMQKL+++PE VC FPNLT+LDLRLNSL LP +I    |     |
| Sbjct | 24  | DCKKNAVEILEEAKRKSESIQILDGGMQKLTSIPEGVCSFPNLTQLDLRLNSLNSLPGWI   | 83  |
| Query | 70  | GECKRLEQLNLFGNDLTTFPSTFSKLKNLKVLLAGNDFTILPSELLFLPLIKILYVDRN    | 129 |
|       |     | G CK LEQ+NLFGNDL T PS+FSKLKNLKVLL GNNDFT LPSELLFLPLIK LY+D+N   |     |
| Sbjct | 84  | GACKNLEQINLFGNDLNTVPSSFSKLKNLKVLLLGNDFTFLPSELLFLPLIKTLYLDQN    | 143 |
| Query | 130 | KLTLTETDVeilaslssleeldslslnsGIKALPFNYEKLVLNLINLKRLNIKKTSLKGEDA | 189 |
|       |     | KLTLTETDVEILASLSSLEELD+LNSGIK LP NY KL NLI+LKRLNIKKTSLKGD+DA   |     |
| Sbjct | 144 | KLTLTETDVEILASLSSLEELDNLNSGIKVLPSNYNKLKLNLIHLKRLNIKKTSLKGD+DA  | 203 |

Query 190 DKLQAILPNTKIDY 203  
 DKLQA+LPNTKIDY  
 Sbjct 204 DKLQAVLPNTKIDY 217

>WP\_001011126.1 MULTISPECIES: hypothetical protein [Leptospira]  
 EJP05270.1 leucine rich repeat protein [Leptospira interrogans serovar Bulgarica str. Mallika]  
 EK005519.1 leucine rich repeat protein [Leptospira interrogans str. C10069]  
 EK013588.1 leucine rich repeat protein [Leptospira kirschneri str. H1]  
 UID84470.1 hypothetical protein J9305\_05680 [Leptospira interrogans]  
 UML79483.1 hypothetical protein FH602\_14425 [Leptospira kirschneri]  
 Length=217

Score = 251 bits (641), Expect = 3e-81, Method: Compositional matrix adjust.  
 Identities = 157/194 (81%), Positives = 170/194 (88%), Gaps = 0/194 (0%)

Query 10 DCKKNAEEILGEAKAKPELVQTLDFGMQKLSTVPEEVC GFPNLTKDLRLNSLTFLPEFI 69  
 DCKKNA EIL EAK K E +Q LD GMQKL+++PE VC FPNLT+LDLRLNSL LP +I  
 Sbjct 24 DCKKNAVEILEEAKRKSESIQILDGMQKLTSIPEGVCSFPNLTLQLDLRLNSLNSLPGWI 83

Query 70 GECKRLEQLNLF GNDLTTFPSTFSKLKNLKVLLAGNNDFTILPSELLFLPLIKILYVDRN 129  
 G CK LEQ+NLF GNDL T PS+FSKLKNLKVLL GNNDFT LPSELLFLPLIK LY+D+N  
 Sbjct 84 GACKNLEQINLF GNDLNTVPSSFSLKLNKVL LLAGNNDFTFLPSELLFLPLIKTLYLDQN 143

Query 130 KLTLTETDVeilaslsleeldslslnsGIKALPFNYEKLVLNINLKRLNIKKTSLKGEDA 189  
 KLTLTETDVEILASLSLEELD+LNSGIK LP NY KL NL +LKRLNIKKTSLKGEDA  
 Sbjct 144 KLTLTETDVEILASLSLEELDNLNSGIKVLPSNYNKLNLTHLKRLNIKKTSLKGEDA 203

Query 190 DKLQAILPNTKIDY 203  
 DKLQA+LPNTKIDY  
 Sbjct 204 DKLQAVLPNTKIDY 217

>WP\_118981207.1 hypothetical protein [Leptospira stimsonii]  
 RHX88693.1 hypothetical protein DLM78\_07170 [Leptospira stimsonii]  
 TGK22822.1 hypothetical protein EH098\_05955 [Leptospira stimsonii]  
 TGM14994.1 hypothetical protein EH090\_11000 [Leptospira stimsonii]  
 Length=217

Score = 251 bits (640), Expect = 4e-81, Method: Compositional matrix adjust.  
 Identities = 145/195 (74%), Positives = 162/195 (83%), Gaps = 0/195 (0%)

Query 9 FDCKKNAEEILGEAKAKPELVQTLDFGMQKLSTVPEEVC GFPNLTKDLRLNSLTFLPEF 68  
 +CKKN EEIL EA A + + LD GMQKL+++PE C FPNL +LDLRLNSL LPE  
 Sbjct 23 VECKKNVEEILNEANASADSI AVL DLGMQKLTSIPEGACKFPNLKRLDLRLNSLASLPES 82

Query 69 IGECKRLEQLNLF GNDLTTFPSTFSKLKNLKVLLAGNNDFTILPSELLFLPLIKILYVDR 128  
 +GECK +EQLN+FGNDL TFPS SKLKNLKVLLAGNND LPSELLFLP IK +Y+D+  
 Sbjct 83 LGECKSVEQLNVFGNDLKT FPSALS KLKLNKVL LLAGNNDLANLPSELLFLPEIKTIYLDQ 142

Query 129 NKLTLETETDVeilaslsleeldslslnsGIKALPFNYEKLVLNINLKRLNIKKTSLKGED 188  
 NKL LTETDV+ILASLSLEELDLSLN+GIK+LP NY KL NL LKRLNIKKTSLKGED  
 Sbjct 143 NKLILTETDVIDILASLSLEELDLSLNTGIKSLPANYTKLKNLTRLKRLNIKKTSLKGED 202

Query 189 ADKLQAILPNTKIDY 203  
A+KLQAILP TKIDY  
Sbjct 203 AEKLQAILPKTKIDY 217

>WP\_004427427.1 hypothetical protein [Leptospira noguchii]  
EMN02249.1 leucine rich repeat protein [Leptospira noguchii str. 2007001578]  
EPE81746.1 leucine rich repeat protein [Leptospira noguchii str. 1993005606]  
Length=217

Score = 251 bits (640), Expect = 4e-81, Method: Compositional matrix adjust.  
Identities = 154/194 (79%), Positives = 171/194 (88%), Gaps = 0/194 (0%)

Query 10 DCKKNAEEILGEAKAKPELVQTLDFGMQKLSTVPEEVCGFPNLTCLDLRLNSLTFLPEFI 69  
DCKK+A EIL EAK K E VQ LD GMQKL+++PE VC FPNLT+LDLRLNSL+FLP++I  
Sbjct 24 DCKKSAIEILEEAKRKSESVQILDGMQKLTSIPEGVCSFPNLTQLDLRLNSLSFLPDWI 83

Query 70 GECKRLEQLNLFQNDLTTFPSTFSKLKNLKVLLAGNNDFTILPSELLFLPLIKILYVDRN 129  
G CK LEQ+NLFQNDLTT PS+FSKLKNLKVLL GNNDFT LPSELLFLPLIK LY+D+N  
Sbjct 84 GTCKNLEQVNLFGNDLTTVPSSFSLKNLKVLLGNNDFTFLPSELLFLPLIKTLYLDQN 143

Query 130 KLTLTETDVeilaslssleeldslslnsGIKALPFNYEKLVLNINLKRNLNIKKTSKGEDA 189  
KLTLTETD+EIL+SLS LEELDL+LN GIK LP NY KL NL +LKRNLNIKK L+GEDA  
Sbjct 144 KLTLTETDIEILSSLSGLEELDLNLPNGIKMLPSNYNKLKNLTHLKRNLNIKKTLRGEDA 203

Query 190 DKLQAILPNTKIDY 203  
DKLQAILPNTKIDY  
Sbjct 204 DKLQAILPNTKIDY 217

>WP\_004438578.1 hypothetical protein [Leptospira noguchii]  
EM040832.1 leucine rich repeat protein [Leptospira noguchii serovar Autumnalis  
str. ZUN142]  
Length=217

Score = 251 bits (640), Expect = 5e-81, Method: Compositional matrix adjust.  
Identities = 156/202 (77%), Positives = 172/202 (85%), Gaps = 0/202 (0%)

Query 2 FVCFTASFDCKKNAEEILGEAKAKPELVQTLDFGMQKLSTVPEEVCGFPNLTCLDLRLNS 61  
F+ DCKKNA EIL EAK K E VQ LD GMQKL+++PE VC FPNLT+LDLRLNS  
Sbjct 16 FLISIFWIDCKKNAVEILEEAKKKSESVQILDGMQKLTSIPEGVCSFPNLTQLDLRLNS 75

Query 62 LTFLPEFIGECKRLEQLNLFQNDLTTFPSTFSKLKNLKVLLAGNNDFTILPSELLFLPLI 121  
L+FLP++IG CK LEQ+NLFQNDLTT PS+FSKLKNLKVLL GNNDFT LPSELLFLPLI  
Sbjct 76 LSFLPDWIGTCKNLEQVNLFGNDLTTVPSSFSLKNLKVLLGNNDFTFLPSELLFLPLI 135

Query 122 KILYVDRNKLTLTETDVeilaslssleeldslslnsGIKALPFNYEKLVLNINLKRNLNIKK 181  
K LY+D+NKLTLTETD+EIL+SLS LEELDL+LN GIK LP NY KL NL +LKRNLNIKK  
Sbjct 136 KTLYLDQNKLTLTETDIEILSSLSGLEELDLNLPNGIKILPSNYNKLKNLTHLKRNLNIKK 195

Query 182 TSLKGEDADKLQAILPNTKIDY 203  
T LKGEDA KLQAILPNTKIDY  
Sbjct 196 TLLKGEDAGKLQAILPNTKIDY 217

>EMN50877.1 leucine rich repeat protein [Leptospira interrogans str. L1207]  
Length=217

Score = 250 bits (639), Expect = 6e-81, Method: Compositional matrix adjust.  
Identities = 156/194 (80%), Positives = 170/194 (88%), Gaps = 0/194 (0%)

```
Query 10 DCKKNAEEILGEAKAKPELVQTLDFGMQKLSTVP EEVCGFPNLTKDLRLNSLTFLPEFI 69
          DCKKNA EIL EAK K E +Q LD GMQKL+++PE VC FPNLT+LDLRLNSL LP +I
Sbjct 24 DCKKNAVEILEEAKRKSESIQILDG MQKLTSIPEGVCSFPNLTKDLRLNSLNSLPGWI 83

Query 70 GECKRLEQLNLF GNDLTTFPSTFSKLK NLKVLLAGNNDFTILPSELLFLPLIKILYVDRN 129
          G CK LEQ+NLFGNDL T PS+FSKLK NLKVLL GNNDFT LPSELLFLPLIK LY+D+N
Sbjct 84 GACKNLEQINLF GNDLNTVPSSFSKLK NLKVLLGNNDFTFLPSELLFLPLIKTLYLDQN 143

Query 130 KLTLTETDVeilaslssleeldslslnsGIKALPFNYEKL VNLINLKRNLNIKKTSLKGEDA 189
          KLTLTETDVEILASLSSLEELD L+LNSGIK LP NY KL NL +LKRLNIKKTSLKGEDA
Sbjct 144 KLTLTETDVEILASLSSLEELD LNLNSGIKVLPSNYNKLK NLTHLKRNLNIKKTSLKGEDA 203

Query 190 DKLQAILPNTKIDY 203
          DKLQA+LPNT+IDY
Sbjct 204 DKLQAVLPNTRIDY 217
```

>WP\_001010181.1 MULTISPECIES: hypothetical protein [Leptospira]  
KAA1269663.1 hypothetical protein C5473\_18355 [Leptospira interrogans serovar Weerasinghe]  
ASV07105.1 hypothetical protein B2G47\_15925 [Leptospira interrogans serovar Canicola]  
EJ080485.1 leucine rich repeat protein [Leptospira interrogans serovar Pomona str. Kennewicki LC82-25]  
EJP16928.1 leucine rich repeat protein [Leptospira interrogans str. FPW2026]  
EKN96857.1 leucine rich repeat protein [Leptospira interrogans serovar Pomona str. Pomona]  
Length=217

Score = 250 bits (638), Expect = 7e-81, Method: Compositional matrix adjust.  
Identities = 156/194 (80%), Positives = 170/194 (88%), Gaps = 0/194 (0%)

```
Query 10 DCKKNAEEILGEAKAKPELVQTLDFGMQKLSTVP EEVCGFPNLTKDLRLNSLTFLPEFI 69
          DCKKNA EIL EAK K E +Q LD GMQKL+++PE VC FPNLT+LDLRLNSL LP +I
Sbjct 24 DCKKNAVEILEEAKRKSESIQILDG MQKLTSIPEGVCSFPNLTKDLRLNSLNSLPGWI 83

Query 70 GECKRLEQLNLF GNDLTTFPSTFSKLK NLKVLLAGNNDFTILPSELLFLPLIKILYVDRN 129
          G CK LEQ+NLFGNDL T PS+FSKLK NLKVLL GNNDFT LPSELLFLPLIK LY+D+N
Sbjct 84 GACKNLEQINLF GNDLNTVPSSFSKLK NLKVLLGNNDFTFLPSELLFLPLIKTLYLDQN 143

Query 130 KLTLTETDVeilaslssleeldslslnsGIKALPFNYEKL VNLINLKRNLNIKKTSLKGEDA 189
          KLTLTETDVEILASLSSLEELD L+LNSGIK LP NY KL NL +LKRLNIKKTSLKGEDA
Sbjct 144 KLTLTETDVEILASLSSLEELD LNLNSGIKVLPSNYNKLK NLTHLKRNLNIKKTSLKGEDA 203

Query 190 DKLQAILPNTKIDY 203
          DKLQA+LPNT+IDY
Sbjct 204 DKLQAVLPNTRIDY 217
```

>WP\_001010177.1 hypothetical protein [Leptospira interrogans]  
 KAA1287472.1 hypothetical protein C4X99\_23350 [Leptospira interrogans serovar Geyawera]  
 MCR8646250.1 hypothetical protein [Leptospira interrogans serovar Bataviae]  
 OAM85608.1 hypothetical protein A1343\_17415 [Leptospira interrogans serovar Bataviae]  
 QC036829.1 hypothetical protein E4412\_06120 [Leptospira interrogans]  
 QOI37956.1 hypothetical protein Lepto1548\_06450 [Leptospira interrogans serovar Bataviae]  
 Length=217

Score = 250 bits (638), Expect = 8e-81, Method: Compositional matrix adjust.  
 Identities = 156/194 (80%), Positives = 170/194 (88%), Gaps = 0/194 (0%)

|       |     |                                                                 |     |
|-------|-----|-----------------------------------------------------------------|-----|
| Query | 10  | DCKKNAEEILGEAKAKPELVQTLDFGMQKLSTVPPEEVC GFPNLT KDLRLNSLTFLPEFI  | 69  |
|       |     | DCKKNA EIL EAK K E +Q LD GMQKL+++PE VC FPNLT+LDLRLNSL LP +I     |     |
| Sbjct | 24  | DCKKNAVEILEEAKRKSESIQILDGMQKLTSIPEGVCSFPNLTQLDLRLNSLNSLPGWI     | 83  |
|       |     |                                                                 |     |
| Query | 70  | GECKRLEQLNLF GNDLTTFPSTFSKLKNLKVLLAGNNDFTILPSELLFLPLIKILYVDRN   | 129 |
|       |     | G CK LEQ+NLFGNDL T PS+FSKLKNLKVLL GNNDFT LPSELLFLPLIK LY+D+N    |     |
| Sbjct | 84  | GACKNLEQINLF GNDLNTVPSSFSKLKNLKVLLGNNDFTFLPSELLFLPLIKTLYLDQN    | 143 |
|       |     |                                                                 |     |
| Query | 130 | KLTLTETDVeilaslsleeeldslslnsGIKALPFNYEKLVLNLINLKRNLNIKKTSLKGEDA | 189 |
|       |     | KLTLTETDVEILASLSLEEELDL+LNSGIK LP NY KL NL +LKRLNIKKTSLKGEDA    |     |
| Sbjct | 144 | KLTLTETDVEILASLSLEEELDLNLNSGIKVLPSNYNKLKLNTHLKRNLNIKKTSLKGEDA   | 203 |
|       |     |                                                                 |     |
| Query | 190 | DKLQAILPNTKIDY 203                                              |     |
|       |     | DKLQA+LPNT+IDY                                                  |     |
| Sbjct | 204 | DKLQAVLPNTRIDY 217                                              |     |

>WP\_002177142.1 hypothetical protein [Leptospira noguchii]  
 EM054849.1 leucine rich repeat protein [Leptospira noguchii]  
 EQA71632.1 leucine rich repeat protein [Leptospira noguchii serovar Panama str. CZ214]  
 MCH1912101.1 hypothetical protein [Leptospira noguchii]  
 MCH1915762.1 hypothetical protein [Leptospira noguchii]  
 UOG63215.1 hypothetical protein MAL04\_12845 [Leptospira noguchii]  
 Length=217

Score = 250 bits (638), Expect = 1e-80, Method: Compositional matrix adjust.  
 Identities = 155/194 (80%), Positives = 169/194 (87%), Gaps = 0/194 (0%)

|       |     |                                                                 |     |
|-------|-----|-----------------------------------------------------------------|-----|
| Query | 10  | DCKKNAEEILGEAKAKPELVQTLDFGMQKLSTVPPEEVC GFPNLT KDLRLNSLTFLPEFI  | 69  |
|       |     | DCKK+A EIL EAK K E VQ LD GMQKL+++PE VC FPNLT+LDLRLNSL FLP++I    |     |
| Sbjct | 24  | DCKKSAIEILEEAKRKSESVQILDGMQKLTSIPEGVCSFPNLTQLDLRLNSLNLFPDWI     | 83  |
|       |     |                                                                 |     |
| Query | 70  | GECKRLEQLNLF GNDLTTFPSTFSKLKNLKVLLAGNNDFTILPSELLFLPLIKILYVDRN   | 129 |
|       |     | G CK LEQ+NLFGNDLTT PS+FSKLKNLKVLL GNNDFT LPSELLFLPLIK LY D+N    |     |
| Sbjct | 84  | GTCKNLEQVNLFGNDLTTVPSSFSKLKNLKVLLGNNDFTFLPSELLFLPLIKTLYFDQN     | 143 |
|       |     |                                                                 |     |
| Query | 130 | KLTLTETDVeilaslsleeeldslslnsGIKALPFNYEKLVLNLINLKRNLNIKKTSLKGEDA | 189 |
|       |     | KLTLTETD+EIL+SLS LEEELDL+LN GIK LP NY KL NL +LKRLNIKKT LKGEDA   |     |
| Sbjct | 144 | KLTLTETDIEILSSLSGLEELDLNLNPGIKILPSNYNKLKLNTHLKRNLNIKKTLLKGEDA   | 203 |

Query 190 DKLQAILPNTKIDY 203  
 DKLQAILPNTKIDY  
 Sbjct 204 DKLQAILPNTKIDY 217

>WP\_100785841.1 hypothetical protein [Leptospira adleri]  
 PJZ53367.1 hypothetical protein CH380\_10810 [Leptospira adleri]  
 PJZ64012.1 hypothetical protein CH376\_00300 [Leptospira adleri]  
 Length=218

Score = 249 bits (637), Expect = 1e-80, Method: Compositional matrix adjust.  
 Identities = 144/193 (75%), Positives = 162/193 (84%), Gaps = 0/193 (0%)

Query 11 CKKNAAEILGEAKAKPELVQTLDFGMQKLSTVPEEVC GFPNLTKDLRLNSLTFLPEFIG 70  
 CKKN EEIL EA A + + LD GMQKL+++PE VC FPNL +LDLRLNSL LP+ +G  
 Sbjct 26 CKKNTEEILNEANANADSI AVL DLGMQKLTSIPEGVCKFPNLKRLDLRLNSLASLPDSL G 85

Query 71 ECKRLEQLNLF GNDLTTFPSTFSKLK NLKVLLAGNNDFTILPSELLFLPLIKILYVDRNK 130  
 +CK +EQLN+FGNDL TFPS SKLKNLKVLLAGNND T LPSELLFLP IK +Y+D+NK  
 Sbjct 86 DCKSVEQLNVFGNDLKT FPSALS KLK NLKVLLAGNNDLTNLPSELLFLPEIKTIYMDQNK 145

Query 131 LTLTETDVeilaslssleeldslnsG IKALPFNYEKL VNLINLKR LNIKKTS LKGEDAD 190  
 LTLTE DV+ILASLS+LEELD L+LNSGIK+LP NY KL NL LKRLNIKKTS LKGEDAD  
 Sbjct 146 LTLTEADVILASLSNLEELD LNLNSGIKSLPTNYAKLKNLTRLKR LNIKKTS LKGEDAD 205

Query 191 KLQAILPNTKIDY 203  
 KLQ ILP TKIDY  
 Sbjct 206 KLQTILPKTKIDY 218

>WP\_135691680.1 hypothetical protein [Leptospira adleri]  
 TGM52779.1 hypothetical protein EHQ97\_12710 [Leptospira adleri]  
 Length=218

Score = 249 bits (635), Expect = 2e-80, Method: Compositional matrix adjust.  
 Identities = 144/193 (75%), Positives = 162/193 (84%), Gaps = 0/193 (0%)

Query 11 CKKNAAEILGEAKAKPELVQTLDFGMQKLSTVPEEVC GFPNLTKDLRLNSLTFLPEFIG 70  
 CKKN EEIL EA A + + LD GMQKL+++PE VC FPNL +LDLRLNSL LP+ +G  
 Sbjct 26 CKKNTEEILNEANANADSI AVL DLGMQKLTSIPEGVCKFPNLKRLDLRLNSLASLPDSL G 85

Query 71 ECKRLEQLNLF GNDLTTFPSTFSKLK NLKVLLAGNNDFTILPSELLFLPLIKILYVDRNK 130  
 +CK +EQLN+FGNDL TFPS SKLKNLKVLLAGNND T LPSELLFLP IK +Y+D+NK  
 Sbjct 86 DCKSVEQLNVFGNDLKT FPSALS KLK NLKVLLAGNNDLTNLPSELLFLPEIKTIYMDQNK 145

Query 131 LTLTETDVeilaslssleeldslnsG IKALPFNYEKL VNLINLKR LNIKKTS LKGEDAD 190  
 LTLTETDV+ILASLS+LEELD L+LNSGIK+LP NY KL NL LKR NIKKTS LKGEDAD  
 Sbjct 146 LTLTETDVILASLSNLEELD LNLNSGIKSLPSNYAKLKNLTRLKRFNIKKTS LKGEDAD 205

Query 191 KLQAILPNTKIDY 203  
 KLQ ILP TKIDY  
 Sbjct 206 KLQTILPKTKIDY 218



>PJZ91020.1 hypothetical protein CH379\_21015 [Leptospira ellisii]  
PKA03647.1 hypothetical protein CH375\_15745 [Leptospira ellisii]  
Length=217

Score = 248 bits (633), Expect = 4e-80, Method: Compositional matrix adjust.  
Identities = 143/200 (72%), Positives = 164/200 (82%), Gaps = 0/200 (0%)

```
Query 4 CFTASFDCCKNAEEILGEAKAKPELVQTLDFGMQKLSTVPPEVCGFPNLTKDLRLNSLT 63
      C + DCKKNAEEIL EA+ K E + LD GMQKLS++PE +C FPNL +LDLRLNSL+
Sbjct 18 CMLSLSDCCKNAEEILTEAEKKTETITVLDLGMQKLSSLPEGICSFPNLQRLDLRLNSLS 77

Query 64 FLPEFIGECKRLEQLNLFGNDLTTFPSTFSKLNKLVLLAGNNDFTILPSELLFLPLIKI 123
      L E IG+C LEQ+NLFGNDL+T PSTFSKLNK L+VLL G+NDF LPSELLFLP I+
Sbjct 78 TLAETIGDCGNLEQINLFGNDLSTLPSTFSKLNKRLRVLLMGSNDFKTLPESELLFLPEIRT 137

Query 124 LYVDRNKLTLTETDVeilaslssleeldslslnsGIKALPFNYEKLVLNLINLKRLNIKKTS 183
      +Y D+NKL+L ETDVEILASL+ LEELDL+LNS IK LP NY KL NL LKRLNIKKTS
Sbjct 138 IYADQNKLSLAETDVEILASLTGLEELDLNLNSNIKTLPPNYTKLNKRLKRLNIKKTS 197

Query 184 LKGEDADKLQAILPNTKIDY 203
      LKGEDA+KLQAILP+TKIDY
Sbjct 198 LKGEDAELQAILPSTKIDY 217
```

>WP\_002188945.1 hypothetical protein [Leptospira interrogans]  
ALE38687.1 leucine-rich-repeat protein [Leptospira interrogans serovar Hardjo str. Norma]  
ALN99945.1 hypothetical protein LIH\_06205 [Leptospira interrogans serovar Hardjo-prajitno]  
EK095373.1 leucine rich repeat protein [Leptospira interrogans str. Brem 329]  
MCD1166362.1 hypothetical protein [Leptospira interrogans]  
MCH1885836.1 hypothetical protein [Leptospira interrogans]  
Length=217

Score = 248 bits (633), Expect = 5e-80, Method: Compositional matrix adjust.  
Identities = 155/194 (80%), Positives = 169/194 (87%), Gaps = 0/194 (0%)

```
Query 10 DCKKNAEEILGEAKAKPELVQTLDFGMQKLSTVPPEVCGFPNLTKDLRLNSLTFLPEFI 69
      DCKKNA EIL EAK K E +Q LD GMQKL+++PE VC FPNLT+LDLRLNSL LP +I
Sbjct 24 DCKKNAVEILEEAKRKSESIQILDLMQKLTSIPEGVCSFPNLQLDLRLNSLNSLPGWI 83

Query 70 GECKRLEQLNLFGNDLTTFPSTFSKLNKLVLLAGNNDFTILPSELLFLPLIKILYVDRN 129
      G CK LEQ+NLFGNDL PS+FSKLNKLVLL GNNDFT LPSELLFLPLIK LY+D+N
Sbjct 84 GACKNLEQINLFGNDLNMVPSSFSLKLNKLVLLGNNDFTFLPSELLFLPLIKTLYLDQN 143

Query 130 KLTLTETDVeilaslssleeldslslnsGIKALPFNYEKLVLNLINLKRLNIKKTSLSKGEDA 189
      KLTLTETDVEILASLSSLEELDL+LNSGIK LP NY KL NL +LKRLNIKKTSLSKGEDA
Sbjct 144 KLTLTETDVEILASLSSLEELDLNLNSGIKVLPSNYNKLKLNTHLKRLNIKKTSLSKGEDA 203

Query 190 DKLQAILPNTKIDY 203
      DKLQA+LPNT+IDY
Sbjct 204 DKLQAVLPNTRIDY 217
```

>WP\_118970865.1 hypothetical protein [Leptospira stimsonii]  
RHX84273.1 hypothetical protein DLM75\_23045 [Leptospira stimsonii]  
Length=217

Score = 248 bits (632), Expect = 6e-80, Method: Compositional matrix adjust.  
Identities = 145/193 (75%), Positives = 160/193 (83%), Gaps = 0/193 (0%)

```
Query   11   CKKNAAEEILGEAKAKPELVQTLDFGMQKLSTVPEEVC GFPNLTKDLRLNSLTFLPEFIG   70
          CKKN EEIL EA A  + +  LD GMQKL+++PE C FPNL +LDLRLNSL LPE G
Sbjct   25   CKKNVEEILNEANASADSI AVL DLGMQKLTSIPEGACKFPNLKRLDLRLNSLASLPESFG   84

Query   71   ECKRLEQLNLF GNDLTTFPSTFSKLKNLKVLLAGNNDFTILPSELLFLPLIKILYVDRNK   130
          ECK +EQLN+FGNDL TFPS SKLKNLKVLLAGNND LPSSELLFLP IK +Y+D+NK
Sbjct   85   ECKSVEQLNVFGNDLKT FPSALS KLKNLKVLLAGNNDLANLPSELLFLPEIKTIYLDQNK   144

Query   131  LTLTETDVeilaslssleeldslslnsGIKALPFNYEKLVLNINLKRNLNIKKTSLKGEDAD   190
          L LTETDV+ILASLSSLEELDLSLN+GIK+LP NY KL NL LKRLNIKKTSLKGEDA+
Sbjct   145  LILTETDVIDILASLSSLEELDLSLNTGIKSLPANYTKLKNLTLLKRLNIKKTSLKGEDAE   204

Query   191  KLQAILPNTKIDY   203
          KLQAILP TKIDY
Sbjct   205  KLQAILPKTKIDY   217
```

>WP\_243399589.1 hypothetical protein [Leptospira ellisii]  
Length=199

Score = 246 bits (627), Expect = 2e-79, Method: Compositional matrix adjust.  
Identities = 142/194 (73%), Positives = 162/194 (84%), Gaps = 0/194 (0%)

```
Query   10   DCKKNAAEEILGEAKAKPELVQTLDFGMQKLSTVPEEVC GFPNLTKDLRLNSLTFLPEFI   69
          DCKKNAAEEIL EA+ K E +  LD GMQKLS++PE +C FPNL +LDLRLNSL+ L E I
Sbjct    6   DCKKNAAEEILTEAEKKTETITVLDLGMQKLSSSLPEGICSFPNLQRLDLRLNSLSTLAETI   65

Query   70   GECKRLEQLNLF GNDLTTFPSTFSKLKNLKVLLAGNNDFTILPSELLFLPLIKILYVDRN   129
          G+C LEQ+NLFGNDL+T PSTFSKLK L+VLL G+NDF LPSSELLFLP I+ +Y D+N
Sbjct   66   GDCGNLEQINLFGNDLSTLPSTFSKLKRLRVLLMGSNDFKTLPSSELLFLPEIRTIYADQN   125

Query   130  KLTLTETDVeilaslssleeldslslnsGIKALPFNYEKLVLNINLKRNLNIKKTSLKGEDA   189
          KL+L ETDVEILASL+ LEELD+LNS IK LP NY KL NL LKRLNIKKTSLKGEDA
Sbjct   126  KLSLAETDVEILASLTGLEELDNLNSNIKTLPPNYTKLKNLRLKRLNIKKTSLKGEDA   185

Query   190  DKLQAILPNTKIDY   203
          +KLQAILP+TKIDY
Sbjct   186  EKLQAILPSTKIDY   199
```

>WP\_135589926.1 leucine-rich repeat domain-containing protein [Leptospira gomenensis]  
TGK28958.1 leucine-rich repeat domain-containing protein [Leptospira gomenensis]  
TGK35419.1 leucine-rich repeat domain-containing protein [Leptospira gomenensis]  
TGK40717.1 leucine-rich repeat domain-containing protein [Leptospira gomenensis]  
TGK68439.1 leucine-rich repeat domain-containing protein [Leptospira gomenensis]  
Length=217

Score = 244 bits (622), Expect = 2e-78, Method: Compositional matrix adjust.

Identities = 136/193 (70%), Positives = 160/193 (83%), Gaps = 0/193 (0%)

```
Query 11  CKKNAAEILGEAKAKPELVQTLDFGMQKLSTVPEEVC GFPNLTKDLRLNSLTFLPEFIG 70
          CKKNAAEIL +A+A PE V LD GMQKL++ P +C FPNL++LDLRLNSL+ L E IG
Sbjct 25  CKKNAAEILKDAEASPETVTVLDLGMQKLSTPNGICSFPNLSRLDLRLNSLSSLAETIG 84

Query 71  ECKRLEQLNLF GNDLTTFPSTFSKLKLNKVLLAGNNDFTILPSELLFLPLIKILYVDRNK 130
          +CK LEQ+NLFGNDL+ FPS+FSKLK L+V+L G+NDF PSE LFLP I+ +Y D+N+
Sbjct 85  DCKNLEQINLFGNDLSAFPSSFSKLKRLRVILMGSNDFKTFPSEFLFLPEIRTIYADQNQ 144

Query 131  LTLTETDVeilaslssleeldslslnsGIKALPFNYEKLVLNINLKRLNIKKTSLKGEDAD 190
          L+LTETDVEILASL+ LEELDL+LN IK+LP NY KL NL LKRLNIKKTSL+GEDAD
Sbjct 145  LSLTETDVEILASLTGLEELDLNLRNISKSLPSNYTKLKNLTRLKRLNIKKTSLRGEDAD 204

Query 191  KLQAILPNTKIDY 203
          KLQAILP TKIDY
Sbjct 205  KLQAILPKTKIDY 217
```

>WP\_250180949.1 hypothetical protein [Leptospira interrogans]  
MCL8309742.1 hypothetical protein [Leptospira interrogans]  
Length=217

Score = 232 bits (591), Expect = 1e-73, Method: Compositional matrix adjust.  
Identities = 156/194 (80%), Positives = 170/194 (88%), Gaps = 0/194 (0%)

```
Query 10  DCKKNAAEILGEAKAKPELVQTLDFGMQKLSTVPEEVC GFPNLTKDLRLNSLTFLPEFI 69
          DCKKNA EIL EAK K E +Q LD GMQKL+++PE VC FPNLT+LDLRLNSL LP +I
Sbjct 24  DCKKNAVEILEEAKRKSESIQILDGMQKLTSIPEGVCSFPNLTQLDLRLNSLNSLPGWI 83

Query 70  GECKRLEQLNLF GNDLTTFPSTFSKLKLNKVLLAGNNDFTILPSELLFLPLIKILYVDRN 129
          G CK LEQ+NLFGNDL T PS+FSKLKLNKVLL GNNDFT LPSELLFLPL+K LY+D+N
Sbjct 84  GACKNLEQINLFGNDLNTVPSSFSKLKLNKVLLGNNDFTFLPSELLFLPLLKTLYLDQN 143

Query 130  KLTLTETDVeilaslssleeldslslnsGIKALPFNYEKLVLNINLKRLNIKKTSLKGEDA 189
          KLTLTETDVEILASLSSLEELDL+LNSGIK LP NY KL NL +LKRLNIKKTSLKGEDA
Sbjct 144  KLTLTETDVEILASLSSLEELDLNLSGIKVLPSNYNKLKNLTHLKRLNIKKTSLKGEDA 203

Query 190  DKLQAILPNTKIDY 203
          DKLQA+LPNTKIDY
Sbjct 204  DKLQAVLPNTKIDY 217
```

>WP\_061272825.1 hypothetical protein [Leptospira interrogans]  
Length=217

Score = 231 bits (590), Expect = 2e-73, Method: Compositional matrix adjust.  
Identities = 156/194 (80%), Positives = 170/194 (88%), Gaps = 0/194 (0%)

```
Query 10  DCKKNAAEILGEAKAKPELVQTLDFGMQKLSTVPEEVC GFPNLTKDLRLNSLTFLPEFI 69
          DCKKNA EIL EAK K E +Q LD GMQKL+++PE VC FPNLT+LDLRLNSL LP +I
Sbjct 24  DCKKNAVEILEEAKRKSESIQILDGMQKLTSIPEGVCSFPNLTQLDLRLNSLNSLPGWI 83

Query 70  GECKRLEQLNLF GNDLTTFPSTFSKLKLNKVLLAGNNDFTILPSELLFLPLIKILYVDRN 129
          G CK LEQ+NLFGNDL T PS+FSKLKLNKVLL GNNDFT LPSELLFLPL+K LY+D+N
```

|       |     |                                                                |     |
|-------|-----|----------------------------------------------------------------|-----|
| Sbjct | 84  | GACKNLEQINLFGNDLNTVPSSFSKLKNLKVLLLGNNDFTFLPSELLFLPLLKTYLDQN    | 143 |
| Query | 130 | KLTLTETDVeilaslssleeldslslnsGIKALPFNYEKLVLNLINLKRLNIKKTSLKGEDA | 189 |
|       |     | KLTLTETDVEILASLSSLEELD+LNSGIK LP NY KL NL +LKRLNIKKTSLKGEDA    |     |
| Sbjct | 144 | KLTLTETDVEILASLSSLEELDNLNSGIKVLPSNYNKLKLNTHLKRLNIKKTSLKGEDA    | 203 |
| Query | 190 | DKLQAILPNTKIDY                                                 | 203 |
|       |     | DKLQA+LPNTKIDY                                                 |     |
| Sbjct | 204 | DKLQAVLPNTKIDY                                                 | 217 |

>WP\_002127204.1 hypothetical protein [Leptospira interrogans]  
 EMN78462.1 leucine rich repeat protein [Leptospira interrogans serovar Grippotyphosa str. UI 12764]  
 EM095466.1 leucine rich repeat protein [Leptospira interrogans str. UI 13372]  
 Length=217

Score = 231 bits (590), Expect = 2e-73, Method: Compositional matrix adjust.  
 Identities = 156/194 (80%), Positives = 170/194 (88%), Gaps = 0/194 (0%)

|       |     |                                                                |     |
|-------|-----|----------------------------------------------------------------|-----|
| Query | 10  | DCKKNAEEILGEAKAKPELVQTLDFGMQKLSTVPPEEVCGFPNLTKLDLRLNSLTFLPEFI  | 69  |
|       |     | DCKKNA EIL EAK K E +Q LD GMQKL+++PE VC FPNLT+LDLRLNSL LP +I    |     |
| Sbjct | 24  | DCKKNAVEILEEAKRKSESIQILDGLMQKLTSIPEGVCSFPNLTQLDLRLNSLNSLPGWI   | 83  |
| Query | 70  | GECKRLEQLNLFGNDLTTFPSTFSKLKNLKVLLAGNNDFTILPSELLFLPLIKILYVDRN   | 129 |
|       |     | G CK LEQ+NLFGNDL T PS+FSKLKNLKVLL GNNDFT LPSELLFLPL+K LY+D+N   |     |
| Sbjct | 84  | GACKNLEQINLFGNDLNTVPSSFSKLKNLKVLLLGNNDFTFLPSELLFLPLLKTYLDQN    | 143 |
| Query | 130 | KLTLTETDVeilaslssleeldslslnsGIKALPFNYEKLVLNLINLKRLNIKKTSLKGEDA | 189 |
|       |     | KLTLTETDVEILASLSSLEELD+LNSGIK LP NY KL NL +LKRLNIKKTSLKGEDA    |     |
| Sbjct | 144 | KLTLTETDVEILASLSSLEELDNLNSGIKVLPSNYNKLKLNTHLKRLNIKKTSLKGEDA    | 203 |
| Query | 190 | DKLQAILPNTKIDY                                                 | 203 |
|       |     | DKLQA+LPNTKIDY                                                 |     |
| Sbjct | 204 | DKLQAVLPNTKIDY                                                 | 217 |

>WP\_061286495.1 hypothetical protein [Leptospira interrogans]  
 Length=217

Score = 231 bits (589), Expect = 2e-73, Method: Compositional matrix adjust.  
 Identities = 154/194 (79%), Positives = 170/194 (88%), Gaps = 0/194 (0%)

|       |     |                                                                |     |
|-------|-----|----------------------------------------------------------------|-----|
| Query | 10  | DCKKNAEEILGEAKAKPELVQTLDFGMQKLSTVPPEEVCGFPNLTKLDLRLNSLTFLPEFI  | 69  |
|       |     | DCKKNA EIL EAK K E +Q LD GMQKL+++PE VC FPNLT+LDLRLNSL LP +I    |     |
| Sbjct | 24  | DCKKNAVEILEEAKRKSESIQILDGLMQKLTSIPEGVCSFPNLTQLDLRLNSLNSLPGWI   | 83  |
| Query | 70  | GECKRLEQLNLFGNDLTTFPSTFSKLKNLKVLLAGNNDFTILPSELLFLPLIKILYVDRN   | 129 |
|       |     | G CK LEQ+NLFGNDL T PS+FSKLKNLKVLL GNNDFT LPSELLFLPL+K LY+D+N   |     |
| Sbjct | 84  | GACKNLEQINLFGNDLNTVPSSFSKLKNLKVLLLGNNDFTFLPSELLFLPLLKTYLDQN    | 143 |
| Query | 130 | KLTLTETDVeilaslssleeldslslnsGIKALPFNYEKLVLNLINLKRLNIKKTSLKGEDA | 189 |
|       |     | KLTLTETDVEI+ASLSSLEELD+LNSGIK LP NY KL NL +LKRLNIKKTSLKGEDA    |     |
| Sbjct | 144 | KLTLTETDVEIIASLSSLEELDNLNSGIKVLPSNYNKLKLNTHLKRLNIKKTSLKGEDA    | 203 |

Query 190 DKLQAILPNTKIDY 203  
 DKLQA+LPNT+IDY  
 Sbjct 204 DKLQAVLPNTRIDY 217

>WP\_001010185.1 hypothetical protein [Leptospira interrogans]  
 EMN29390.1 leucine rich repeat protein [Leptospira interrogans serovar Pyrogenes str. L0374]  
 EMP06413.1 leucine rich repeat protein [Leptospira interrogans serovar Pyrogenes str. 200701872]  
 EMN63541.1 leucine rich repeat protein [Leptospira interrogans serovar Pyrogenes str. R168]  
 QC033794.1 hypothetical protein E4414\_12465 [Leptospira interrogans]  
 QOI35068.1 hypothetical protein LeptoLang\_13150 [Leptospira interrogans serovar Icterohaemorrhagiae]  
 Length=217

Score = 231 bits (589), Expect = 3e-73, Method: Compositional matrix adjust.  
 Identities = 155/194 (80%), Positives = 170/194 (88%), Gaps = 0/194 (0%)

Query 10 DCKKNAEEILGEAKAKPELVQTLDFGMQKLSTVPPEVCGFPNLTKLDLRLNSLTFLPEFI 69  
 DCKKNA EIL EAK K E +Q LD GMQKL+++PE VC FPNLT+LDLRLNSL LP +I  
 Sbjct 24 DCKKNAVEILEEAKRKSESIQILDGMLQKLSIPEGVCSFPNLTKLDLRLNSLNSLPGWI 83

Query 70 GECKRLEQLNLFQNDLTTFPSTFSKLNKLVLLAGNNDFTILPSELLFLPLIKILYVDRN 129  
 G CK LEQ+NLFGNDL T PS+FSKLNKLVLL GNNDFT LPSELLFLPL+K LY+D+N  
 Sbjct 84 GACKNLEQINLFGNDLNTVPSSFSLKLNKLVLLGNNDFTFLPSELLFLPLKTLTYLDQN 143

Query 130 KLTLTETDVeilaslsleeldlslnsGIKALPFNYEKLVLNINLKRNLNIKKTSLKGEDA 189  
 KLTLTETDVEILASLSLEELD+LNSGIK LP NY KL NL +LKRLNIKKTSLKGEDA  
 Sbjct 144 KLTLTETDVEILASLSLEELDNLNSGIKVLPSNYNKLNLTHLKRNLNIKKTSLKGEDA 203

Query 190 DKLQAILPNTKIDY 203  
 DKLQA+LPNT+IDY  
 Sbjct 204 DKLQAVLPNTRIDY 217

>WP\_001010184.1 MULTISPECIES: hypothetical protein [Leptospira]  
 EMF71629.1 leucine rich repeat protein [Leptospira interrogans serovar Canicola str. LT1962]  
 EMG20762.1 leucine rich repeat protein [Leptospira interrogans serovar Copenhageni str. LT2050]  
 EM002625.1 leucine rich repeat protein [Leptospira interrogans serovar Icterohaemorrhagiae str. Verdun HP]  
 OCA00011.1 Leucine rich repeat protein [Leptospira interrogans serovar Copenhageni/Icterohaemorrhagiae]  
 AAN48523.1 leucine-rich-repeat protein [Leptospira interrogans serovar Lai str. 56601]  
 Length=217

Score = 231 bits (588), Expect = 3e-73, Method: Compositional matrix adjust.  
 Identities = 155/194 (80%), Positives = 170/194 (88%), Gaps = 0/194 (0%)

Query 10 DCKKNAEEILGEAKAKPELVQTLDFGMQKLSTVPPEVCGFPNLTKLDLRLNSLTFLPEFI 69

|       |     |                                                                                                                               |     |
|-------|-----|-------------------------------------------------------------------------------------------------------------------------------|-----|
| Sbjct | 24  | DCKKNA EIL EAK K E +Q LD GMQKL+++PE VC FPNLT+LDLRLNSL LP +I<br>DCKKNAVEILEEAKRKSESIQILDGMQKLTSIPEGVCSFPNLTQLDLRLNSLNSLPGWI    | 83  |
| Query | 70  | GECKRLEQLNLFGNDLTTFPSTFSKLKNLKVLLAGNNDFTILPSELLFLPLIKILYVDRN<br>G CK LEQ+NLFGNDL T PS+FSKLKNLKVLL GNNDFT LPSELLFLPL+K LY+D+N  | 129 |
| Sbjct | 84  | GACKNLEQINLFGNDLNTVPSSFSLKLNKVLLLGNNDFTFLPSELLFLPLLKTLYLDQN                                                                   | 143 |
| Query | 130 | KLTLTETDVeilaslssleeldslslnSGIKALPFNYEKLVLNLINLKRLNIKKTSLKGEDA<br>KLTLTETDVEILASLSSLEELD+LNSGIK LP NY KL NL +LKRLNIKKTSLKGEDA | 189 |
| Sbjct | 144 | KLTLTETDVEILASLSSLEELDNLNSGIKVLPSNYNKLNLTHLKRLNIKKTSLKGEDA                                                                    | 203 |
| Query | 190 | DKLQAILPNTKIDY 203<br>DKLQA+LPNT+IDY                                                                                          |     |
| Sbjct | 204 | DKLQAVLPNTRIDY 217                                                                                                            |     |

>WP\_001010182.1 hypothetical protein [Leptospira interrogans]  
 EMY06628.1 leucine rich repeat protein [Leptospira interrogans str. 2002000626]  
 EMY23346.1 leucine rich repeat protein [Leptospira interrogans serovar Australis str. 200703203]  
 EKN86156.1 leucine rich repeat protein [Leptospira interrogans str. 2002000624]  
 EKQ39337.1 leucine rich repeat protein [Leptospira interrogans str. 2002000621]  
 EKQ45586.1 leucine rich repeat protein [Leptospira interrogans str. 2002000623]  
 Length=217

Score = 231 bits (588), Expect = 3e-73, Method: Compositional matrix adjust.  
 Identities = 154/194 (79%), Positives = 170/194 (88%), Gaps = 0/194 (0%)

|       |     |                                                                                                                               |     |
|-------|-----|-------------------------------------------------------------------------------------------------------------------------------|-----|
| Query | 10  | DCKKNAEEILGEAKAKPELVQTLDFGMQKLSTVPPEVCGFPNLTKLDLRLNSLTLFPEFI                                                                  | 69  |
| Sbjct | 24  | DCKKNA EIL EAK K E +Q LD GMQKL+++PE VC FPNLT+LDLRLNSL LP +I<br>DCKKNAVEILEEAKRKSESIQILDGMQKLTSIPEGVCSFPNLTQLDLRLNSLNSLPGWI    | 83  |
| Query | 70  | GECKRLEQLNLFGNDLTTFPSTFSKLKNLKVLLAGNNDFTILPSELLFLPLIKILYVDRN<br>G CK LEQ+NLFGNDL T PS+FSKLKNLKVLL GNNDFT LPSELLFLPL+K LY+D+N  | 129 |
| Sbjct | 84  | GACKNLEQINLFGNDLNTVPSSFSLKLNKVLLLGNNDFTFLPSELLFLPLLKTLYLDQN                                                                   | 143 |
| Query | 130 | KLTLTETDVeilaslssleeldslslnSGIKALPFNYEKLVLNLINLKRLNIKKTSLKGEDA<br>KLTLTETDVEI+ASLSSLEELD+LNSGIK LP NY KL NL +LKRLNIKKTSLKGEDA | 189 |
| Sbjct | 144 | KLTLTETDVEIIASLSSLEELDNLNSGIKVLPSNYNKLNLTHLKRLNIKKTSLKGEDA                                                                    | 203 |
| Query | 190 | DKLQAILPNTKIDY 203<br>DKLQA+LPNT+IDY                                                                                          |     |
| Sbjct | 204 | DKLQAVLPNTRIDY 217                                                                                                            |     |

>WP\_001010178.1 hypothetical protein [Leptospira interrogans]  
 EMF44105.1 leucine rich repeat protein [Leptospira interrogans serovar Lora str. TE 1992]  
 EMG10292.1 leucine rich repeat protein [Leptospira interrogans serovar Grippotyphosa str. LT2186]  
 EMN70889.1 leucine rich repeat protein [Leptospira interrogans serovar Bataviae str. UI 08561]  
 AJR13823.1 hypothetical protein LIL\_11221 [Leptospira interrogans serovar Linhai str. 56609]  
 AKH76669.1 leucine rich repeat protein [Leptospira interrogans serovar Bratislava]

Length=217

Score = 231 bits (588), Expect = 3e-73, Method: Compositional matrix adjust.  
Identities = 155/194 (80%), Positives = 170/194 (88%), Gaps = 0/194 (0%)

```
Query 10 DCKKNAEEILGEAKAKPELVQTLDGFMQKLSTVPPEEVC GFPNLT KDLRLNSLTFLPEFI 69
          DCKKNA EIL EAK K E +Q LD GMQKL+++PE VC FPNLT+LDLRLNSL LP +I
Sbjct 24 DCKKNAVEILEEAKRKSESIQILDGFMQKLTSIPEGVCSFPNLTQLDLRLNSLNSLPGWI 83

Query 70 GECKRLEQLNLF GNDLTTFPSTFSKLKNLKVLLAGNNDFTILPSELLFLPLIKILYVDRN 129
          G CK LEQ+NLF GNDL T PS+FSKLKNLKVLL GNNDFT LPSELLFLPL+K LY+D+N
Sbjct 84 GACKNLEQINLF GNDLNTVPSSFSKLKNLKVLLGNNDFTFLPSELLFLPLLKTLYLDQN 143

Query 130 KLTLTETDVeilaslssleeldslnsGIKALPFNYEKL VNLINLKRLNIKKTSLKGEDA 189
          KLTLTETDVEILASLSSLEELD+LNSGIK LP NY KL NL +LKRLNIKKTSLKGEDA
Sbjct 144 KLTLTETDVEILASLSSLEELDNLNSGIKVLPSNYNKLKNLTHLKRLNIKKTSLKGEDA 203

Query 190 DKLQAILPNTKIDY 203
          DKLQA+LPNT+IDY
Sbjct 204 DKLQAVLPNTRIDY 217
```

>WP\_001010183.1 hypothetical protein [Leptospira interrogans]

AKP26578.1 leucine rich repeat protein [Leptospira interrogans serovar Manilae]

AKP30357.1 leucine rich repeat protein [Leptospira interrogans serovar Manilae]

EYU63041.1 hypothetical protein CI00\_16890 [Leptospira interrogans serovar

Manilae]

SOR62694.1 Leucine rich repeat protein [Leptospira interrogans serovar Manilae]

Length=217

Score = 231 bits (588), Expect = 4e-73, Method: Compositional matrix adjust.  
Identities = 155/194 (80%), Positives = 169/194 (87%), Gaps = 0/194 (0%)

```
Query 10 DCKKNAEEILGEAKAKPELVQTLDGFMQKLSTVPPEEVC GFPNLT KDLRLNSLTFLPEFI 69
          DCKKNA EIL EAK K E +Q LD GMQKL+++PE VC FPNLT+LDLRLNSL LP +I
Sbjct 24 DCKKNAVEILEEAKRKSESIQILDGFMQKLTSIPEGVCSFPNLTQLDLRLNSLNSLPGWI 83

Query 70 GECKRLEQLNLF GNDLTTFPSTFSKLKNLKVLLAGNNDFTILPSELLFLPLIKILYVDRN 129
          G CK LEQ+NLF GNDL T PS+FSKLKNLKVLL GNNDFT LPSELLFLPL+K LY+D+N
Sbjct 84 GACKNLEQINLF GNDLNTVPSSFSKLKNLKVLLGNNDFTFLPSELLFLPLLKTLYLDQN 143

Query 130 KLTLTETDVeilaslssleeldslnsGIKALPFNYEKL VNLINLKRLNIKKTSLKGEDA 189
          KLTLTETDVEILASL SLEELD+LNSGIK LP NY KL NL +LKRLNIKKTSLKGEDA
Sbjct 144 KLTLTETDVEILASLFSLEELDNLNSGIKVLPSNYNKLKNLTHLKRLNIKKTSLKGEDA 203

Query 190 DKLQAILPNTKIDY 203
          DKLQA+LPNTKIDY
Sbjct 204 DKLQAVLPNTKIDY 217
```

>WP\_192505591.1 hypothetical protein [Leptospira interrogans]

QOI42007.1 hypothetical protein Lepto782\_06840 [Leptospira interrogans serovar Canicola]

Length=217

Score = 229 bits (584), Expect = 1e-72, Method: Compositional matrix adjust.  
Identities = 154/194 (79%), Positives = 169/194 (87%), Gaps = 0/194 (0%)

```
Query 10 DCKKNAEEILGEAKAKPELVQTLDFGMQKLSTVPPEVCGFPNLTKDLRLNSLTFLPEFI 69
          DCKKNA EIL EAK K E +Q LD GMQKL+++PE VC FPNLT+LDLRLNSL LP +I
Sbjct 24 DCKKNAVEILEEAKRKSESIQILDGMLQKLSIPEGVCSPNLTLQDLRLNSLNSLPGWI 83

Query 70 GECKRLEQLNLFNGDLTTFPSTFSKLKLNKVLLAGNNDFTILPSELLFLPLIKILYVDRN 129
          G CK LEQ+NLFGNDL T PS+FSKLKLNKVLL GNNDFT LPSELLFLPL+K LY+D+N
Sbjct 84 GACKNLEQINLFNGDLNTPSSFSKLKLNKVLLGNNDFTFLPSELLFLPLLKTYLDQN 143

Query 130 KLTLTETDVeilaslsleeldlslnsGIKALPFNYEKLVLNINLKRLNIKKTSLKGEDA 189
          K TLTLTETDVEILASLSSEELD+LNSGIK LP NY KL NL +LKRLNIKKTSLKGEDA
Sbjct 144 KFTLTETDVEILASLSSEELDNLNSGIKVLPSNYNKLKLNTHLKRLNIKKTSLKGEDA 203

Query 190 DKLQAILPNTKIDY 203
          DKLQA+LPNT+IDY
Sbjct 204 DKLQAVLPNTRIDY 217
```

>EMM97254.1 leucine rich repeat protein [*Leptospira interrogans* serovar Zanon]  
str. LT2156]  
Length=188

Score = 218 bits (555), Expect = 1e-68, Method: Compositional matrix adjust.  
Identities = 147/187 (79%), Positives = 164/187 (88%), Gaps = 0/187 (0%)

```
Query 17 EILGEAKAKPELVQTLDFGMQKLSTVPPEVCGFPNLTKDLRLNSLTFLPEFIGECKRLE 76
          EIL +AK K E +Q LD GMQKL+++PE VC FPNLT+LDLRLNSL LP +IG CK LE
Sbjct 2 EILEAKARKSESIQILDGMLQKLSIPEGVCSPNLTLQDLRLNSLNSLPGWIGACKNLE 61

Query 77 QLNLFNGDLTTFPSTFSKLKLNKVLLAGNNDFTILPSELLFLPLIKILYVDRNKLTLTET 136
          Q+NLFGNDL T PS+FSKLKLNKVLL GNNDFT LPSELLFLPL+K LY+D+NKLTTLTET
Sbjct 62 QINLFNGDLNTPSSFSKLKLNKVLLGNNDFTFLPSELLFLPLLKTYLDQNKLTLTET 121

Query 137 DVeilaslsleeldlslnsGIKALPFNYEKLVLNINLKRLNIKKTSLKGEDADKLQAIL 196
          DVEI+ASLSSEELD+LNSGIK LP NY KL NL +LKRLNIKKTSLKGEDADKLQA+L
Sbjct 122 DVEIIASLSSEELDNLNSGIKVLPSNYNKLKLNTHLKRLNIKKTSLKGEDADKLQAVL 181

Query 197 PNTKIDY 203
          PNT+IDY
Sbjct 182 PNTRIDY 188
```

>MBW9228790.1 hypothetical protein [*Leptospira interrogans*]  
Length=186

Score = 216 bits (551), Expect = 5e-68, Method: Compositional matrix adjust.  
Identities = 147/186 (79%), Positives = 163/186 (88%), Gaps = 0/186 (0%)

```
Query 18 ILGEAKAKPELVQTLDFGMQKLSTVPPEVCGFPNLTKDLRLNSLTFLPEFIGECKRLEQ 77
          +L EAK K E +Q LD GMQKL+++PE VC FPNLT+LDLRLNSL LP +IG CK LEQ
Sbjct 1 MLEEAKRKSESIQILDGMLQKLSIPEGVCSPNLTLQDLRLNSLNSLPGWIGACKNLEQ 60

Query 78 LNLFGNDLTTFPSTFSKLKLNKVLLAGNNDFTILPSELLFLPLIKILYVDRNKLTLTETD 137
```



|       |     |                                                                                                                               |     |
|-------|-----|-------------------------------------------------------------------------------------------------------------------------------|-----|
| Sbjct | 61  | +NLFGNDL T PS+FSKLKNLKVLL GNNDFT LPSELLFLPL+K LY+D+NKLTLTETD<br>INLFGNDLNTVPSSFSKLKNLKVLLLGNNDFTFLPSELLFLPLLKTLYLDQNKLTLTETD  | 120 |
| Query | 138 | VeilaslsleeeldlslnsGIKALPFNYEKLVLNLINLKRLNIKKTSLKGEDADKLQAILP<br>VEILASLSLEEELDL+LNSGIK LP NY KL NL +LKRLNIKKTSLKGEDADKLQA+LP | 197 |
| Sbjct | 121 | VEILASLSLEEELDLNLNSGIKVLPSNYNKLKNLTHLKRLNIKKTSLKGEDADKLQAVLP                                                                  | 180 |
| Query | 198 | NTKIDY 203<br>NT+IDY                                                                                                          |     |
| Sbjct | 181 | NTRIDY 186                                                                                                                    |     |

Multiple sequence alignment of the protein rhKU\_Sej\_LRR\_2271 (Genbank: AFV46188.1) and the amino sequences of *Leptospira* that has the same serovars with rabbit hyperimmune sera in this study using Clustal Omega (<https://www.ebi.ac.uk/Tools/msa/clustalo/>: access on 11 November 2022)

```

OCA00011.1      -----MN-----F-LSLKKIFKLYFFLWSFFGIDCKKNAVEILEEA 36
EM002625.1      -----MN-----F-LSLKKIFKLYFFLWSFFGIDCKKNAVEILEEA 36
EMF71629.1      -----MN-----F-LSLKKIFKLYFFLWSFFGIDCKKNAVEILEEA 36
QOI35068.1      -----MN-----F-LSLKKIFKLYFFLWSFFVIDCKKNAVEILEEA 36
EMN63541.1      -----MN-----F-LSLKKIFKLYFFLWSFFVIDCKKNAVEILEEA 36
EMP06413.1      -----MN-----F-LSLKKIFKLYFFLWSFFVIDCKKNAVEILEEA 36
EMN29390.1      -----MN-----F-LSLKKIFKLYFFLWSFFVIDCKKNAVEILEEA 36
EMN70889.1      -----MN-----F-LSLKKIFKIYFFLWSFFGIDCKKNAVEILEEA 36
EMN78462.1      -----MN-----F-LSLKKIFKIYFFLWSFFGIDCKKNAVEILEEA 36
AKH76669.1      -----MN-----F-LSLKKIFKIYFFLWSFFGIDCKKNAVEILEEA 36
EMG10292.1      -----MN-----F-LSLKKIFKIYFFLWSFFGIDCKKNAVEILEEA 36
EMY23346.1      -----MN-----F-LSLKKIFKLYFFLWSFFGIDCKKNAVEILEEA 36
QOI42007.1      -----MN-----F-LSLKKIFKLYFFLWSFFGIDCKKNAVEILEEA 36
ASV07105.1      -----MN-----F-LSLKKIFKLYFFLWSFFGIDCKKNAVEILEEA 36
EJ080485.1      -----MN-----F-LSLKKIFKLYFFLWSFFGIDCKKNAVEILEEA 36
EKN96857.1      -----MN-----F-LSLKKIFKLYFFLWSFFGIDCKKNAVEILEEA 36
MCR8646250.1    -----MN-----F-LSLKKIFKIYFFLWSFFGIDCKKNAVEILEEA 36
OAM85608.1      -----MN-----F-LSLKKIFKIYFFLWSFFGIDCKKNAVEILEEA 36
QOI37956.1      -----MN-----F-LSLKKIFKIYFFLWSFFGIDCKKNAVEILEEA 36
OOV43912.1      -----MN-----F-VFLKKIFRIYFFFWISIFGIDCKKNAVEIIEEA 36

```

|            |                                                              |    |
|------------|--------------------------------------------------------------|----|
| EKQ84072.1 | -----MN-----F-LFLKKIFRIYFFFWISIFGIDCKKNAVEILEEA              | 36 |
| EPG48343.1 | -----MN-----F-LFLKKIFRIYFFFWISIFGIDCKKNAVEILEEA              | 36 |
| EJ071711.1 | -----MN-----F-LFLKKIFRIYFFFWISIFGIDCKKNAVEILEEA              | 36 |
| EM040832.1 | -----MN-----S-LSLKKIFRIYFFFLISIFWIDCKKNAVEILEEA              | 36 |
| EQA71632.1 | -----MN-----S-LSLKKIFRIYFFFLISIFWIDCKKSAIEILEEA              | 36 |
| EMY77189.1 | MQVKSMILVGTLEKFAFLILFIPKTFQLVGKVMIAIGWLFFASIFWIDCKKTAEIILGEA | 60 |
| EMJ90581.1 | -----MN-----F-PSLKKFVTIGSLFLAPIFWIDCKKNAAEILREA              | 36 |
| EQA82096.1 | -----MN-----F-PSLKKFVTIGSLFLAPIFWIDCKKNAAEILREA              | 36 |
| EKT85788.2 | -----MIEGVERMN-----F-PLLKRFLTIGFICFTASLEIDCKKNTEEILEEA       | 43 |
| EMN21750.1 | -----MN-----F-PLLKRFLTIGFICFTASLEIDCKKNTEEILEEA              | 36 |
| EQA64549.1 | -----MREGVKRMN-----F-PLLKEFLAIGFICFTAS--FDCKKNAAEILGEA       | 41 |
| AFV46185.1 | -----GFLCFTAS--FDCKKNAAEILGEA                                | 22 |
| PTM44326.1 | -----MREGAKRMN-----F-PLLKEFLVIGFVCFTAS--FDCKKNAAEILGEA       | 41 |
| AFV46188.1 | -----GFVCFTAS--FDCKKNAAEILGEA                                | 22 |
| ALO26640.1 | -----MREGAKRMN-----F-PLLKEFLVIGFVCFTAS--FDCKKNAAEILGEA       | 41 |
| AFV46187.1 | -----GFVCFTAS--FDCKKNAAEILGEA                                | 22 |
| AFV46186.1 | -----GFVCFTAS--FDCKKNAAEILGEA                                | 22 |
| AXX17321.1 | -----MN-----F-PLLKEFLVIGFVCFTAS--FDCKKNAAEILGEA              | 34 |
| EM062774.1 | -----MN-----F-PLLKEFLVIGFVCFTAS--FNCKKNAAEILGEA              | 34 |
| ABJ76745.1 | -----MN-----F-PLLKEFLVIGFVCFTAS--FNCKKNAAEILGEA              | 34 |

. ::\*\*\*.: \*\*: \*\*

|              |                                                                |
|--------------|----------------------------------------------------------------|
| OCA00011.1   | KRKSESIQILDLMQKLTSIPEGVCSFPNLTQLDLRLNSLNSLPGWIGACKNLEQINLFG 96 |
| EM002625.1   | KRKSESIQILDLMQKLTSIPEGVCSFPNLTQLDLRLNSLNSLPGWIGACKNLEQINLFG 96 |
| EMF71629.1   | KRKSESIQILDLMQKLTSIPEGVCSFPNLTQLDLRLNSLNSLPGWIGACKNLEQINLFG 96 |
| QOI35068.1   | KRKSESIQILDLMQKLTSIPEGVCSFPNLTQLDLRLNSLNSLPGWIGACKNLEQINLFG 96 |
| EMN63541.1   | KRKSESIQILDLMQKLTSIPEGVCSFPNLTQLDLRLNSLNSLPGWIGACKNLEQINLFG 96 |
| EMP06413.1   | KRKSESIQILDLMQKLTSIPEGVCSFPNLTQLDLRLNSLNSLPGWIGACKNLEQINLFG 96 |
| EMN29390.1   | KRKSESIQILDLMQKLTSIPEGVCSFPNLTQLDLRLNSLNSLPGWIGACKNLEQINLFG 96 |
| EMN70889.1   | KRKSESIQILDLMQKLTSIPEGVCSFPNLTQLDLRLNSLNSLPGWIGACKNLEQINLFG 96 |
| EMN78462.1   | KRKSESIQILDLMQKLTSIPEGVCSFPNLTQLDLRLNSLNSLPGWIGACKNLEQINLFG 96 |
| AKH76669.1   | KRKSESIQILDLMQKLTSIPEGVCSFPNLTQLDLRLNSLNSLPGWIGACKNLEQINLFG 96 |
| EMG10292.1   | KRKSESIQILDLMQKLTSIPEGVCSFPNLTQLDLRLNSLNSLPGWIGACKNLEQINLFG 96 |
| EMY23346.1   | KRKSESIQILDLMQKLTSIPEGVCSFPNLTQLDLRLNSLNSLPGWIGACKNLEQINLFG 96 |
| QOI42007.1   | KRKSESIQILDLMQKLTSIPEGVCSFPNLTQLDLRLNSLNSLPGWIGACKNLEQINLFG 96 |
| ASV07105.1   | KRKSESIQILDLMQKLTSIPEGVCSFPNLTQLDLRLNSLNSLPGWIGACKNLEQINLFG 96 |
| EJ080485.1   | KRKSESIQILDLMQKLTSIPEGVCSFPNLTQLDLRLNSLNSLPGWIGACKNLEQINLFG 96 |
| EKN96857.1   | KRKSESIQILDLMQKLTSIPEGVCSFPNLTQLDLRLNSLNSLPGWIGACKNLEQINLFG 96 |
| MCR8646250.1 | KRKSESIQILDLMQKLTSIPEGVCSFPNLTQLDLRLNSLNSLPGWIGACKNLEQINLFG 96 |
| OAM85608.1   | KRKSESIQILDLMQKLTSIPEGVCSFPNLTQLDLRLNSLNSLPGWIGACKNLEQINLFG 96 |
| QOI37956.1   | KRKSESIQILDLMQKLTSIPEGVCSFPNLTQLDLRLNSLNSLPGWIGACKNLEQINLFG 96 |
| OOV43912.1   | KRKSESVQILDLMQKLTSIPEGICSFPNLTQLDLRLNSLNSLPDWIGTCKNLEQINLFG 96 |
| EKQ84072.1   | KRKSESVQILDLMQKLTSIPEGICSFPNLTQLDLRLNSLNSLPDWIGTCKNLEQINLFG 96 |
| EPG48343.1   | KRKSESVQILDLMQKLTSIPEGICSFPNLTQLDLRLNSLNSLPDWIGTCKNLEQINLFG 96 |
| EJ071711.1   | KRKSESVQILDLMQKLTSIPEGICSFPNLTQLDLRLNSLNSLPDWIGTCKNLEQINLFG 96 |

|            |                                                                   |
|------------|-------------------------------------------------------------------|
| EM040832.1 | KKKSESVQILDLMQKLTSIPEGVCSFPNLTQLDLRLNSLSFLPDWIGTCKNLEQVNLFG 96    |
| EQA71632.1 | KRKSESVQILDLMQKLTSIPEGVCSFPNLTQLDLRLNSLNFLPDWIGTCKNLEQVNLFG 96    |
| EMY77189.1 | KASPSSVLLLDLMQKLSSIEGICSFPNLTKDLRLNSLTSLPESVGECKNLEQLNLFG 120     |
| EMJ90581.1 | NTKPESVRVLDLMQKLSSVPDGVCGFPNLTNLDLRLNSLTSLPEFIGECKNLEQLNLFG 96    |
| EQA82096.1 | NTKPESVRVLDLMQKLSSVPDGVCGFPNLTNLDLRLNSLTSLPEFIGECKNLEQLNLFG 96    |
| EKT85788.2 | KARPESVQTLDFGMRKLSAVPEGVCGFPNLTKDLRLNSLTSLPEFIGECKSLEQLNLFG 103   |
| EMN21750.1 | KARPESVQTLDFGMRKLSAVPEGVCGFPNLTKDLRLNSLTSLPEFIGECKSLEQLNLFG 96    |
| EQA64549.1 | KAKPELVQTLDFGMQKLSTVPEGVCGFPNLTKDLRLNSLSSLPDEIGDCKNLEQLNLFG 101   |
| AFV46185.1 | KAKPELVQTLDFGMQKLSTVPEEVCVCGFPNLTKDLRLNSLTFLPEFIGECKRLEQLNLFG 82  |
| PTM44326.1 | KAKPELVQTLDFGMQKLSTVPEEVCVCGFPNLTKDLRLNSLTFLPEFIGECKRLEQLNLFG 101 |
| AFV46188.1 | KAKPELVQTLDFGMQKLSTVPEEVCVCGFPNLTKDLRLNSLTFLPEFIGECKRLEQLNLFG 82  |
| ALO26640.1 | KAKPELVQTLDFGMQKLSTVPEEVCVCGFPNLTKDLRLNSLTFLPEFIGECKRLEQLNLFG 101 |
| AFV46187.1 | KAKPELVQTLDFGMQKLSTVPEEVCVCGFPNLTKDLRLNSLTFLPEFIGECKRLEQLNLFG 82  |
| AFV46186.1 | KAKPELVQTLDFGMQKLSTVPEEVCVCGFPNLTKDLRLNSLTFLPEFIGECKRLEQLNLFG 82  |
| AXX17321.1 | KAKPELVQTLDFGMQKLSTVPEEVCVCGFPNLTKDLRLNSLTFLPEFIGECKRLEQLNLFG 94  |
| EM062774.1 | KAKPELVQTLDFGMQKLSTVPEGVCGFPNLTKDLRLNSLTFLPEFIGECKRLEQLNLFG 94    |
| ABJ76745.1 | KAKPELVQTLDFGMQKLSTVPEGVCGFPNLTKDLRLNSLTFLPEFIGECKRLEQLNLFG 94    |

: . : \*\*:\*\*:\*\*:\*\*:\*: :\*.\*\*\*\* :\*\*\*\*\*. \* :\* \*\* \*\*:\*\*\*\*

|              |                                                                       |
|--------------|-----------------------------------------------------------------------|
| OCA00011.1   | NDLNTVPSSF SKLKNLKVLLLGNNDFTF LPSSELLFLPLLKTL YLDQNKLT LTETDVEILA 156 |
| EM002625.1   | NDLNTVPSSF SKLKNLKVLLLGNNDFTF LPSSELLFLPLLKTL YLDQNKLT LTETDVEILA 156 |
| EMF71629.1   | NDLNTVPSSF SKLKNLKVLLLGNNDFTF LPSSELLFLPLLKTL YLDQNKLT LTETDVEILA 156 |
| QOI35068.1   | NDLNTVPSSF SKLKNLKVLLLGNNDFTF LPSSELLFLPLLKTL YLDQNKLT LTETDVEILA 156 |
| EMN63541.1   | NDLNTVPSSF SKLKNLKVLLLGNNDFTF LPSSELLFLPLLKTL YLDQNKLT LTETDVEILA 156 |
| EMP06413.1   | NDLNTVPSSF SKLKNLKVLLLGNNDFTF LPSSELLFLPLLKTL YLDQNKLT LTETDVEILA 156 |
| EMN29390.1   | NDLNTVPSSF SKLKNLKVLLLGNNDFTF LPSSELLFLPLLKTL YLDQNKLT LTETDVEILA 156 |
| EMN70889.1   | NDLNTVPSSF SKLKNLKVLLLGNNDFTF LPSSELLFLPLLKTL YLDQNKLT LTETDVEILA 156 |
| EMN78462.1   | NDLNTVPSSF SKLKNLKVLLLGNNDFTF LPSSELLFLPLLKTL YLDQNKLT LTETDVEILA 156 |
| AKH76669.1   | NDLNTVPSSF SKLKNLKVLLLGNNDFTF LPSSELLFLPLLKTL YLDQNKLT LTETDVEILA 156 |
| EMG10292.1   | NDLNTVPSSF SKLKNLKVLLLGNNDFTF LPSSELLFLPLLKTL YLDQNKLT LTETDVEILA 156 |
| EMY23346.1   | NDLNTVPSSF SKLKNLKVLLLGNNDFTF LPSSELLFLPLLKTL YLDQNKLT LTETDVEIIA 156 |
| QOI42007.1   | NDLNTVPSSF SKLKNLKVLLLGNNDFTF LPSSELLFLPLLKTL YLDQNKFT LTETDVEILA 156 |
| ASV07105.1   | NDLNTVPSSF SKLKNLKVLLLGNNDFTF LPSSELLFLPLIKTL YLDQNKLT LTETDVEILA 156 |
| EJ080485.1   | NDLNTVPSSF SKLKNLKVLLLGNNDFTF LPSSELLFLPLIKTL YLDQNKLT LTETDVEILA 156 |
| EKN96857.1   | NDLNTVPSSF SKLKNLKVLLLGNNDFTF LPSSELLFLPLIKTL YLDQNKLT LTETDVEILA 156 |
| MCR8646250.1 | NDLNTVPSSF SKLKNLKVLLLGNNDFTF LPSSELLFLPLIKTL YLDQNKLT LTETDVEILA 156 |
| OAM85608.1   | NDLNTVPSSF SKLKNLKVLLLGNNDFTF LPSSELLFLPLIKTL YLDQNKLT LTETDVEILA 156 |
| QOI37956.1   | NDLNTVPSSF SKLKNLKVLLLGNNDFTF LPSSELLFLPLIKTL YLDQNKLT LTETDVEILA 156 |
| OOV43912.1   | NDLATIPSSF SKLKNLKVLLVGNNDFAF LPSSELLFLPLIKIL YLDQNKLT LTETDVEILS 156 |
| EKQ84072.1   | NDLATIPSSF SKLKNLKVLLVGNNDFAF LPSSELLFLPLIKIL YLDQNKLT LTETDVEILA 156 |
| EPG48343.1   | NDLATIPSSF SKLKNLKVLLVGNNDFAF LPSSELLFLPLIKIL YLDQNKLT LTETDVEILA 156 |
| EJ071711.1   | NDLATIPSSF SKLKNLKVLLVGNNDFAF LPSSELLFLPLIKIL YLDQNKLT LTETDVEILA 156 |

|            |                                                                    |
|------------|--------------------------------------------------------------------|
| EM040832.1 | NDLTTVPSSF SKLKNLKVLL LGNNDFTFLPSELLFLPLIKTLYLDQNKLTLTETDIEILS 156 |
| EQA71632.1 | NDLTTVPSSF SKLKNLKVLL LGNNDFTFLPSELLFLPLIKTLYFDQNKLTLTETDIEILS 156 |
| EMY77189.1 | NDLTTFPASF SKLKNLKVLL AGNNDLTVLPSELLFLPRIKTLYLDQNKITLTETDVEILA 180 |
| EMJ90581.1 | NDLGTFPASIS KLKNLKVLL AGNNDFAALPSELLFLPSIKTLYLDRNKLTLTETDVEILA 156 |
| EQA82096.1 | NDLGTFPASIS KLKNLKVLL AGNNDFAALPSELLFLPSIKTLYLDRNKLTLTETDVEILA 156 |
| EKT85788.2 | NDLTTLPSTF SKLKNLKVLL AGSNDFTVLPSELLFLPSIKTLYVDRNRLTLTETDVEILA 163 |
| EMN21750.1 | NDLTTLPSTF SKLKNLKVLL AGSNDFTVLPSELLFLPSIKTLYVDRNRLTLTETDVEILA 156 |
| EQA64549.1 | NDLTTFPAALS KLKKLRILL AGNNDLKFLPSELLFLPEIKTIYMDQNKLTLTETDVEILA 161 |
| AFV46185.1 | NDLTTFPSTF SKLKNLKVLL AGNNDFTILPSELLFLPLIKILYVDRNKLTLTETDVEILA 142 |
| PTM44326.1 | NDLTTFPSTF SKLKNLKVLL AGNNDFTILPSELLFLPLIKILYVDRNKLTLTETDVEILA 161 |
| AFV46188.1 | NDLTTFPSTF SKLKNLKVLL AGNNDFTILPSELLFLPLIKILYVDRNKLTLTETDVEILA 142 |
| ALO26640.1 | NDLTTFPSTF SKLKNLKVLL AGNNDFTILPSELLFLPLIKILYVDRNKLTLTETDVEILA 161 |
| AFV46187.1 | NDLTTFPSTF SKLKNLKVLL AGNNDFTILPSELLFLPLIKILYVDRNKLTLTETDVEILA 142 |
| AFV46186.1 | NDLTTFPSTF SKLKNLKVLL AGNNDFTILPSELLFLPLIKILYVDRNKLTLTETDVEILA 142 |
| AXX17321.1 | NDLTTFPSTF SKLKNLKVLL AGNNDFTILPSELLFLPLIKILYVDRNKLTLTETDVEILA 154 |
| EM062774.1 | NDLTTFPSTF SKLKNLKVLL AGNNDFTILPSELLFLPLIKILYVDRNKLTLTETDVEILA 154 |
| ABJ76745.1 | NDLTTFPSTF SKLKNLKVLL AGNNDFTILPSELLFLPLIKILYVDRNKLTLTETDVEILA 154 |

\*\*\* \*.\*:.:\*\*\*\*\*:\*:.\* \*.\*\*: \*\*\*\*\* :\* :\*.\*:.\*\*: \*\*\*\*\*:\*\*\*:.

|              |                                                                  |
|--------------|------------------------------------------------------------------|
| OCA00011.1   | SLSSLEELDLNLNSGIKVLPSNYNKLKNLTHLKRLNIKKTSLKGEDADKLQAVLPNTRID 216 |
| EM002625.1   | SLSSLEELDLNLNSGIKVLPSNYNKLKNLTHLKRLNIKKTSLKGEDADKLQAVLPNTRID 216 |
| EMF71629.1   | SLSSLEELDLNLNSGIKVLPSNYNKLKNLTHLKRLNIKKTSLKGEDADKLQAVLPNTRID 216 |
| QOI35068.1   | SLSSLEELDLNLNSGIKVLPSNYNKLKNLTHLKRLNIKKTSLKGEDADKLQAVLPNTRID 216 |
| EMN63541.1   | SLSSLEELDLNLNSGIKVLPSNYNKLKNLTHLKRLNIKKTSLKGEDADKLQAVLPNTRID 216 |
| EMP06413.1   | SLSSLEELDLNLNSGIKVLPSNYNKLKNLTHLKRLNIKKTSLKGEDADKLQAVLPNTRID 216 |
| EMN29390.1   | SLSSLEELDLNLNSGIKVLPSNYNKLKNLTHLKRLNIKKTSLKGEDADKLQAVLPNTRID 216 |
| EMN70889.1   | SLSSLEELDLNLNSGIKVLPSNYNKLKNLTHLKRLNIKKTSLKGEDADKLQAVLPNTRID 216 |
| EMN78462.1   | SLSSLEELDLNLNSGIKVLPSNYNKLKNLTHLKRLNIKKTSLKGEDADKLQAVLPNTKID 216 |
| AKH76669.1   | SLSSLEELDLNLNSGIKVLPSNYNKLKNLTHLKRLNIKKTSLKGEDADKLQAVLPNTRID 216 |
| EMG10292.1   | SLSSLEELDLNLNSGIKVLPSNYNKLKNLTHLKRLNIKKTSLKGEDADKLQAVLPNTRID 216 |
| EMY23346.1   | SLSSLEELDLNLNSGIKVLPSNYNKLKNLTHLKRLNIKKTSLKGEDADKLQAVLPNTRID 216 |
| QOI42007.1   | SLSSLEELDLNLNSGIKVLPSNYNKLKNLTHLKRLNIKKTSLKGEDADKLQAVLPNTRID 216 |
| ASV07105.1   | SLSSLEELDLNLNSGIKVLPSNYNKLKNLTHLKRLNIKKTSLKGEDADKLQAVLPNTRID 216 |
| EJ080485.1   | SLSSLEELDLNLNSGIKVLPSNYNKLKNLTHLKRLNIKKTSLKGEDADKLQAVLPNTRID 216 |
| EKN96857.1   | SLSSLEELDLNLNSGIKVLPSNYNKLKNLTHLKRLNIKKTSLKGEDADKLQAVLPNTRID 216 |
| MCR8646250.1 | SLSSLEELDLNLNSGIKVLPSNYNKLKNLTHLKRLNIKKTSLKGEDADKLQAVLPNTRID 216 |
| OAM85608.1   | SLSSLEELDLNLNSGIKVLPSNYNKLKNLTHLKRLNIKKTSLKGEDADKLQAVLPNTRID 216 |
| QOI37956.1   | SLSSLEELDLNLNSGIKVLPSNYNKLKNLTHLKRLNIKKTSLKGEDADKLQAVLPNTRID 216 |
| OOV43912.1   | SLSSLEELDLNLNSGIKTLPSNYNKLKNLNRLKRLNIKKTSLKGEDADKLQAILPNTKID 216 |
| EKQ84072.1   | SLSSLEELDLNLNSGIKTLPSNYNKLKNLNRLKRLNIKKTSLKGEDADKLQAILPNTKID 216 |
| EPG48343.1   | SLSSLEELDLNLNSGIKTLPSNYNKLKNLNRLKRLNIKKTSLKGEDADKLQAILPNTKID 216 |
| EJ071711.1   | SLSSLEELDLNLNSGIKTLPSNYNKLKNLNRLKRLNIKKTSLRGEDADKLQAILPNTKID 216 |



|            |                                                                   |
|------------|-------------------------------------------------------------------|
| EM040832.1 | SLSGLEELDLNLPNGIKILPSNYNKLKNLTHLKRLNIKKTLKGEDAGKLQAILPNTKID 216   |
| EQA71632.1 | SLSGLEELDLNLPNGIKILPSNYNKLKNLTHLKRLNIKKTLKGEDADKLQAILPNTKID 216   |
| EMY77189.1 | SLSELEELDLNLTGIKTLPSNYGKLKSLARLKKLNIKKTSLKGEDAEKLQAILPNTKID 240   |
| EMJ90581.1 | SLSGLEELDLNLSNDIKALPSNYKKLKNLTRLKRLNIKKTSLKGEDAEKLQAILPNTKID 216  |
| EQA82096.1 | SLSGLEELDLNLSNDIKALPSNYKKLKNLTRLKRLNIKKTSLKGEDAEKLQAILPNTKID 216  |
| EKT85788.2 | SLSSLEELDLNQNSGIGTLPFNYEKLRLNLTGLKRLNIKKTSLKGEDAGKLQAILPNAKID 223 |
| EMN21750.1 | SLSSLEELDLNQNSGIGTLPFNYEKLRLNLTGLKRLNIKKTSLKGEDAGKLQAILPNAKID 216 |
| EQA64549.1 | SLSSLEELDLNLTGIKTLPFNYEKLGNLTNLKRLNIKKTSLKGEDADKLQAILPNTKID 221   |
| AFV46185.1 | SLSSLEELDLSLNSGIKALPFNYEKLVLNLINLKRLNIKKTSLKGEDADKLQAILRNTKID 202 |
| PTM44326.1 | SLSSLEELDLSLNSGIKALPFNYEKLVLNLINLKRLNIKKTSLKGEDADKLQAILPNTKID 221 |
| AFV46188.1 | SLSSLEELDLSLNSGIKALPFNYEKLVLNLINLKRLNIKKTSLKGEDADKLQAILPNTKID 202 |
| ALO26640.1 | SLSSLEELDLSLNSGIKALPFNYEKLVLNLINLKRLNIKKTSLKGEDADKLQAILPNTKID 221 |
| AFV46187.1 | SLSSLEELDLSLNSGIKALPFNYEKLVLNLINLKRLNIKKTSLKGEDADKLQAILPNTKID 202 |
| AFV46186.1 | SLSSLEELDLSLNSGIKALPFNYEKLVLNLINLKRLNIKKTSLKGEDADKLQAILPNTKID 202 |
| AXX17321.1 | SLSSLEELDLSLNSGIKALPFNYEKLVLNLINLKRLNIKKTSLKGEDADKLQAILPNTKID 214 |
| EM062774.1 | SLSSLEELDLSLNSGIKALPFNYEKLVLNLINLKRLNIKKTSLKGEDADKLQAILPNTKID 214 |
| ABJ76745.1 | SLSSLEELDLSLNSGIKALPFNYEKLVLNLINLKRLNIKKTSLKGEDADKLQAILPNTKID 214 |

\*\*\* \*\*\*\*\* . \* . \* \*\* \*\* \*\* . \* \*\*:\*\*\*\*\* \*:\*\*\*\*\* \*\*\*\*\*: \* \*:\*\*\*

|              |       |
|--------------|-------|
| OCA00011.1   | Y 217 |
| EM002625.1   | Y 217 |
| EMF71629.1   | Y 217 |
| QOI35068.1   | Y 217 |
| EMN63541.1   | Y 217 |
| EMP06413.1   | Y 217 |
| EMN29390.1   | Y 217 |
| EMN70889.1   | Y 217 |
| EMN78462.1   | Y 217 |
| AKH76669.1   | Y 217 |
| EMG10292.1   | Y 217 |
| EMY23346.1   | Y 217 |
| QOI42007.1   | Y 217 |
| ASV07105.1   | Y 217 |
| EJ080485.1   | Y 217 |
| EKN96857.1   | Y 217 |
| MCR8646250.1 | Y 217 |
| OAM85608.1   | Y 217 |
| QOI37956.1   | Y 217 |
| OOV43912.1   | Y 217 |
| EKQ84072.1   | Y 217 |
| EPG48343.1   | Y 217 |
| EJ071711.1   | Y 217 |

|            |       |
|------------|-------|
| EM040832.1 | Y 217 |
| EQA71632.1 | Y 217 |
| EMY77189.1 | Y 241 |
| EMJ90581.1 | Y 217 |
| EQA82096.1 | Y 217 |
| EKT85788.2 | Y 224 |
| EMN21750.1 | Y 217 |
| EQA64549.1 | Y 222 |
| AFV46185.1 | Y 203 |
| PTM44326.1 | Y 222 |
| AFV46188.1 | Y 203 |
| ALO26640.1 | Y 222 |
| AFV46187.1 | Y 203 |
| AFV46186.1 | Y 203 |
| AXX17321.1 | Y 215 |
| EM062774.1 | Y 215 |
| ABJ76745.1 | Y 215 |

\*

| Accession    | Accession from 100 Hit | Description                                                                                  | Max Score | Total Score | Query Cover | E value   | Per. Ident |
|--------------|------------------------|----------------------------------------------------------------------------------------------|-----------|-------------|-------------|-----------|------------|
| ALO26640.1   | ALO26640.1             | leucine rich repeat protein [Leptospira borgpetersenii serovar Ballum]                       | 359       | 359         | 100%        | 8E-124    | 100.00%    |
| PTM44326.1   | ALO26640.1             | leucine rich repeat (LRR) protein [Leptospira borgpetersenii serovar Javanica]               | 359       | 359         | 100%        | 8E-124    | 100.00%    |
| AFV46187.1   | AFV46186.1             | leucine-rich repeat protein, partial [Leptospira borgpetersenii serovar Mini]                | 358       | 358         | 100%        | 6.00E-124 | 100.00%    |
| AFV46186.1   | AFV46186.1             | leucine-rich repeat protein, partial [Leptospira borgpetersenii serovar Ballum]              | 358       | 358         | 100%        | 6E-124    | 100.00%    |
| AFV46188.1   | AFV46186.1             | leucine-rich repeat protein, partial [Leptospira borgpetersenii serovar Sejroe]              | 358       | 358         | 100%        | 6E-124    | 100.00%    |
| AXX17321.1   | WP_002731979.1         | hypothetical protein C4Q31_14790 [Leptospira borgpetersenii serovar Ceylonica]               | 358       | 358         | 100%        | 1E-123    | 100.00%    |
| EMO62774.1   | EMO62774.1             | leucine rich repeat protein [Leptospira borgpetersenii serovar Pomona str. 200901868]        | 354       | 354         | 100%        | 7.00E-122 | 99.01%     |
| AFV46185.1   | AFV46185.1             | leucine-rich repeat protein, partial [Leptospira borgpetersenii serovar Javanica]            | 354       | 354         | 100%        | 3E-122    | 99.01%     |
| ABJ76745.1   | WP_011669694.1         | Leucine-rich-repeat protein [Leptospira borgpetersenii serovar Hardjo-bovis str. JB197]      | 352       | 352         | 100%        | 4E-121    | 98.52%     |
| EQA64549.1   | EQA64549.1             | leucine rich repeat protein [Leptospira alexanderi serovar Manhao 3 str. L60]                | 312       | 312         | 100%        | 2E-105    | 86.70%     |
| EKT85788.2   | EKT85788.2             | hypothetical protein LSS_15741 [Leptospira santarosai serovar Shermani str. LT 821]          | 305       | 305         | 100%        | 1E-102    | 85.85%     |
| EMN21750.1   | WP_004471631.1         | leucine rich repeat protein [Leptospira santarosai serovar Arenal str. MAVJ 401]             | 305       | 305         | 100%        | 2E-102    | 85.85%     |
| EMJ90581.1   | WP_020775386.1         | leucine rich repeat protein [Leptospira alstonii serovar Sichuan str. 79601]                 | 278       | 278         | 96%         | 6E-92     | 83.59%     |
| EQA82096.1   | WP_020775386.1         | leucine rich repeat protein [Leptospira alstonii serovar Pingchang str. 80-412]              | 278       | 278         | 96%         | 6E-92     | 83.59%     |
| EMY77189.1   | EMY77189.1             | leucine rich repeat protein [Leptospira weilii serovar Ranarum str. ICFT]                    | 277       | 277         | 100%        | 4E-91     | 78.05%     |
| EPG48343.1   | WP_004759233.1         | leucine rich repeat protein [Leptospira kirschneri serovar Cynopteri str. 3522 CT]           | 270       | 270         | 95%         | 2E-88     | 81.44%     |
| EJO71711.1   | WP_004750770.1         | leucine rich repeat protein [Leptospira kirschneri serovar Grippotyphosa str. RM52]          | 269       | 269         | 95%         | 3E-88     | 80.93%     |
| OOV43912.1   | WP_082292870.1         | hypothetical protein B1J93_06785 [Leptospira kirschneri serovar Pomona]                      | 268       | 268         | 95%         | 1.00E-87  | 80.41%     |
| EKQ84072.1   | WP_004760926.1         | leucine rich repeat protein [Leptospira kirschneri serovar Grippotyphosa str. Moskva]        | 266       | 266         | 95%         | 2E-87     | 80.93%     |
| EMO40832.1   | WP_004438578.1         | leucine rich repeat protein [Leptospira noguchii serovar Autumnalis str. ZUN142]             | 251       | 251         | 99%         | 5E-81     | 77.23%     |
| ASV07105.1   | WP_001010181.1         | hypothetical protein B2G47_15925 [Leptospira interrogans serovar Canicola]                   | 250       | 250         | 95%         | 7.00E-81  | 80.41%     |
| EJO80485.1   | WP_001010181.1         | leucine rich repeat protein [Leptospira interrogans serovar Pomona str. Kennewicki LC82-25]  | 250       | 250         | 95%         | 7.00E-81  | 80.41%     |
| EKN96857.1   | WP_001010181.1         | leucine rich repeat protein [Leptospira interrogans serovar Pomona str. Pomona]              | 250       | 250         | 95%         | 7.00E-81  | 80.41%     |
| MCR8646250.1 | WP_001010177.1         | hypothetical protein [Leptospira interrogans serovar Bataviae]                               | 250       | 250         | 95%         | 8.00E-81  | 80.41%     |
| OAM85608.1   | WP_001010177.1         | hypothetical protein A1343_17415 [Leptospira interrogans serovar Bataviae]                   | 250       | 250         | 95%         | 8.00E-81  | 80.41%     |
| QOI37956.1   | WP_001010177.1         | hypothetical protein Lepto1548_06450 [Leptospira interrogans serovar Bataviae]               | 250       | 250         | 95%         | 8.00E-81  | 80.41%     |
| EQA71632.1   | WP_002177142.1         | leucine rich repeat protein [Leptospira noguchii serovar Panama str. CZ214]                  | 250       | 250         | 95%         | 1E-80     | 79.90%     |
| QOI35068.1   | WP_001010185.1         | hypothetical protein LeptoLang_13150 [Leptospira interrogans serovar Icterohaemorrhagiae]    | 231       | 231         | 95%         | 3.00E-73  | 79.90%     |
| EMF71629.1   | WP_001010184.1         | leucine rich repeat protein [Leptospira interrogans serovar Canicola str. LT1962]            | 231       | 231         | 95%         | 3.00E-73  | 79.90%     |
| EMO02625.1   | WP_001010184.1         | leucine rich repeat protein [Leptospira interrogans serovar Icterohaemorrhagiae str. Verdun] | 231       | 231         | 95%         | 3.00E-73  | 79.90%     |
| OCA00011.1   | WP_001010184.1         | Leucine rich repeat protein [Leptospira interrogans serovar Copenhageni/Icterohaemorrhagiae] | 231       | 231         | 95%         | 3.00E-73  | 79.90%     |
| EMY23346.1   | WP_001010182.1         | leucine rich repeat protein [Leptospira interrogans serovar Australis str. 200703203]        | 231       | 231         | 95%         | 3.00E-73  | 79.38%     |
| EMN70889.1   | WP_001010178.1         | leucine rich repeat protein [Leptospira interrogans serovar Bataviae str. UI 08561]          | 231       | 231         | 95%         | 3.00E-73  | 79.90%     |
| EMN78462.1   | WP_002127204.1         | leucine rich repeat protein [Leptospira interrogans serovar Grippotyphosa str. UI 12764]     | 231       | 231         | 95%         | 2E-73     | 80.41%     |
| EMN29390.1   | WP_001010185.1         | leucine rich repeat protein [Leptospira interrogans serovar Pyrogenes str. L0374]            | 231       | 231         | 95%         | 3E-73     | 79.90%     |
| EMP06413.1   | WP_001010185.1         | leucine rich repeat protein [Leptospira interrogans serovar Pyrogenes str. 200701872]        | 231       | 231         | 95%         | 3E-73     | 79.90%     |
| EMN63541.1   | WP_001010185.1         | leucine rich repeat protein [Leptospira interrogans serovar Pyrogenes str. R168]             | 231       | 231         | 95%         | 3E-73     | 79.90%     |
| EMG10292.1   | WP_001010178.1         | leucine rich repeat protein [Leptospira interrogans serovar Grippotyphosa str. LT2186]       | 231       | 231         | 95%         | 3E-73     | 79.90%     |
| AKH76669.1   | WP_001010178.1         | leucine rich repeat protein [Leptospira interrogans serovar Bratislava]                      | 231       | 231         | 95%         | 3E-73     | 79.90%     |
| QOI42007.1   | WP_192505591.1         | hypothetical protein Lepto782_06840 [Leptospira interrogans serovar Canicola]                | 229       | 229         | 95%         | 1.00E-72  | 79.38%     |
